# Supplementary material for: Healthcare providers’ attitudes, beliefs and barriers to pulmonary rehabilitation for patients with chronic obstructive pulmonary disease in Saudi Arabia: a cross-sectional study
Source: PubMed Central journal article supplement — BMJ Open. 2022 Oct 27;12(10):e063900. doi: 10.1136/bmjopen-2022-063900 (PMC9621177; doi:10.1136/bmjopen-2022-063900), 2022-10-27
Supplement: bmjopen-2022-063900.draft_revisions.pdf [file bmjopen-2022-063900.draft_revisions.pdf]

# BMJ Open

BMJ Open is committed to open peer review. As part of this commitment we make the peer review history of every article we publish publicly available.

When an article is published we post the peer reviewers' comments and the authors' responses online. We also post the versions of the paper that were used during peer review. These are the versions that the peer review comments apply to.

The versions of the paper that follow are the versions that were submitted during the peer review process. They are not the versions of record or the final published versions. They should not be cited or distributed as the published version of this manuscript.

BMJ Open is an open access journal and the full, final, typeset and author-corrected version of record of the manuscript is available on our site with no access controls, subscription charges or pay-per-view fees (<http://bmjopen.bmj.com>).

If you have any questions on BMJ Open's open peer review process please email [info.bmjopen@bmj.com](mailto:info.bmjopen@bmj.com)

# BMJ Open

## Healthcare Providers' Attitudes, Beliefs and Barriers to Pulmonary Rehabilitation for COPD Patients in Saudi Arabia: A National Survey

|                               |                                                                                                                                                                                                                                                                                                                                                                                                                                                                                                                                                                                                                                                                                                                                                                                                                                                                                                                                                                                                                                                                                                                                                                                                                                                                                                                                                                                                                                                                                                                                                                                                                                         |
|-------------------------------|-----------------------------------------------------------------------------------------------------------------------------------------------------------------------------------------------------------------------------------------------------------------------------------------------------------------------------------------------------------------------------------------------------------------------------------------------------------------------------------------------------------------------------------------------------------------------------------------------------------------------------------------------------------------------------------------------------------------------------------------------------------------------------------------------------------------------------------------------------------------------------------------------------------------------------------------------------------------------------------------------------------------------------------------------------------------------------------------------------------------------------------------------------------------------------------------------------------------------------------------------------------------------------------------------------------------------------------------------------------------------------------------------------------------------------------------------------------------------------------------------------------------------------------------------------------------------------------------------------------------------------------------|
| Journal:                      | <i>BMJ Open</i>                                                                                                                                                                                                                                                                                                                                                                                                                                                                                                                                                                                                                                                                                                                                                                                                                                                                                                                                                                                                                                                                                                                                                                                                                                                                                                                                                                                                                                                                                                                                                                                                                         |
| Manuscript ID                 | bmjopen-2022-063900                                                                                                                                                                                                                                                                                                                                                                                                                                                                                                                                                                                                                                                                                                                                                                                                                                                                                                                                                                                                                                                                                                                                                                                                                                                                                                                                                                                                                                                                                                                                                                                                                     |
| Article Type:                 | Original research                                                                                                                                                                                                                                                                                                                                                                                                                                                                                                                                                                                                                                                                                                                                                                                                                                                                                                                                                                                                                                                                                                                                                                                                                                                                                                                                                                                                                                                                                                                                                                                                                       |
| Date Submitted by the Author: | 14-Apr-2022                                                                                                                                                                                                                                                                                                                                                                                                                                                                                                                                                                                                                                                                                                                                                                                                                                                                                                                                                                                                                                                                                                                                                                                                                                                                                                                                                                                                                                                                                                                                                                                                                             |
| Complete List of Authors:     | <p>Aldhahir, Abdulelah; Jazan University, Faculty of Applied Medical Sciences, Respiratory Therapy Department<br/>         Alqahtani , Jaber S. ; Prince Sultan Military College of Health Sciences, Department of Respiratory Care<br/>         AlDraiwiesh, Ibrahim; Prince Sultan Military College of Health Sciences, Department of Respiratory Care<br/>         Alghamdi, Saeed; Umm Al-Qura University College of Applied Medical Science, Clinical Technology Department, Respiratory Care Program; Imperial College London, National Heart and Lung Institute<br/>         Alsulayyim, Abdullah; Imperial College London, National Heart and Lung Institute; Jazan University, Faculty of Applied Medical Sciences<br/>         Alqarni, Abdullah; King Abdulaziz University, Department of Respiratory Therapy, Faculty of Medical Rehabilitation Sciences<br/>         Alhotye, Munyra; King Saud bin Abdulaziz University for Health Sciences College of Applied Medical Sciences, Department of Respiratory Therapy<br/>         Alwafi, Hassan; Umm Al-Qura University College of Medicine, Faculty of Medicine<br/>         Siraj, Rayan; King Faisal University, Department of Respiratory Therapy, College of Applied Medical Sciences<br/>         Alrajeh, Ahmed; King Faisal University, Department of Respiratory Therapy, College of Applied Medical Sciences<br/>         Aldabayan, Yousef; King Faisal University, Department of Respiratory Therapy, College of Applied Medical Sciences<br/>         Hakamy, Ali ; Jazan University, Respiratory Therapy Department, Faculty of Applied Medical Sciences</p> |
| Keywords:                     | REHABILITATION MEDICINE, RESPIRATORY MEDICINE (see Thoracic Medicine), Chronic airways disease < THORACIC MEDICINE                                                                                                                                                                                                                                                                                                                                                                                                                                                                                                                                                                                                                                                                                                                                                                                                                                                                                                                                                                                                                                                                                                                                                                                                                                                                                                                                                                                                                                                                                                                      |
|                               |                                                                                                                                                                                                                                                                                                                                                                                                                                                                                                                                                                                                                                                                                                                                                                                                                                                                                                                                                                                                                                                                                                                                                                                                                                                                                                                                                                                                                                                                                                                                                                                                                                         |

SCHOLARONE™  
Manuscripts

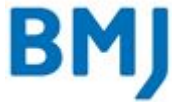

I, the Submitting Author has the right to grant and does grant on behalf of all authors of the Work (as defined in the below author licence), an exclusive licence and/or a non-exclusive licence for contributions from authors who are: i) UK Crown employees; ii) where BMJ has agreed a CC-BY licence shall apply, and/or iii) in accordance with the terms applicable for US Federal Government officers or employees acting as part of their official duties; on a worldwide, perpetual, irrevocable, royalty-free basis to BMJ Publishing Group Ltd ("BMJ") its licensees and where the relevant Journal is co-owned by BMJ to the co-owners of the Journal, to publish the Work in this journal and any other BMJ products and to exploit all rights, as set out in our [licence](#).

The Submitting Author accepts and understands that any supply made under these terms is made by BMJ to the Submitting Author unless you are acting as an employee on behalf of your employer or a postgraduate student of an affiliated institution which is paying any applicable article publishing charge ("APC") for Open Access articles. Where the Submitting Author wishes to make the Work available on an Open Access basis (and intends to pay the relevant APC), the terms of reuse of such Open Access shall be governed by a Creative Commons licence – details of these licences and which [Creative Commons](#) licence will apply to this Work are set out in our licence referred to above.

Other than as permitted in any relevant BMJ Author's Self Archiving Policies, I confirm this Work has not been accepted for publication elsewhere, is not being considered for publication elsewhere and does not duplicate material already published. I confirm all authors consent to publication of this Work and authorise the granting of this licence.

# Healthcare Providers' Attitudes, Beliefs and Barriers to Pulmonary Rehabilitation for COPD Patients in Saudi Arabia: A National Survey

Abdulelah M. Aldhahir<sup>1</sup>  
Jaber S. Alqahtani<sup>2</sup>  
Ibrahim A. AlDraiwiash<sup>2</sup>  
Saeed M. Alghamdi<sup>3,4</sup>  
Abdullah S. Alsulayyim<sup>1,4</sup>  
Abdullah A. Alqarni<sup>5</sup>  
Munyra Alhotye  
Hassan Alwafi<sup>7</sup>  
Rayan A. Siraj<sup>8</sup>  
Ahmed M. Al Rajeh<sup>8</sup>  
Yousef S. Aldabayan<sup>8</sup>  
Ali Hakamy<sup>1</sup>

<sup>1</sup>Respiratory Therapy Department, Faculty of Applied Medical Sciences, Jazan University, Jazan, Saudi Arabia; <sup>2</sup>Department of Respiratory Care, Prince Sultan Military College of Health Sciences, Dammam, Saudi Arabia; <sup>3</sup>Clinical Technology Department, Respiratory Care Program, Faculty of Applied Medical Sciences, Umm Al-Qura University, Makkah, Saudi Arabia; <sup>4</sup>National Heart and Lung Institute, Imperial College London, UK; <sup>5</sup>Department of Respiratory Therapy, Faculty of Medical Rehabilitation Sciences, King Abdulaziz University, Jeddah, Saudi Arabia; <sup>6</sup>Department of Respiratory Therapy, King Saud Bin Abdulaziz University for Health Sciences, Riyadh, Saudi Arabia; <sup>7</sup>Faculty of Medicine, Umm Al-Qura University, Mecca, Saudi Arabia; <sup>8</sup>Department of Respiratory Therapy, College of Applied Medical Sciences, King Faisal University, Al-Hasa, Saudi Arabia

**Word count:** 2214

Corresponding Author:  
Abdulelah Mastour Aldhahir, PhD  
Respiratory Therapy Department  
Faculty of Applied Medical Sciences  
Jazan University  
Saudi Arabia  
Phone: +966557775561  
Email: [Aldhahir.abdulelah@hotmail.com](mailto:Aldhahir.abdulelah@hotmail.com)

## Abstract

**Objectives:** this study are aimed to assess Healthcare Providers (HCPs) attitudes toward delivering PR to COPD patients and identify factors and barriers that might influence referral.

**Design:** A cross-sectional online survey consisting of nine multiple-choice questions.

**Settings:** Kingdom of Saudi Arabia

**Participants:** 980 HCPs included nurses, respiratory therapists, and physiotherapists.

**Primary outcome measures:** to explore HCPs attitudes and expectations toward delivering a PR program to patients with COPD and identify factors and barriers that might influence referral in Saudi Arabia

**Results:** Overall, 980 HCPs, 520 of them male (53.1%), completed the online survey. Nurses accounted for 40.1% of the total sample size, while respiratory therapists and physiotherapists accounted for 32.1% and 16.5%, respectively. Most HCPs strongly agreed that PR would improve COPD patients' exercise capacity 589 (60.1%), improve patients' health-related quality of life 571 (58.3%), and improve disease self-management in COPD patients 589 (60.1%). Moreover, an in-hospital supervised PR program was the preferred way to deliver PR for 748 (76.3%) HCPs, and 832 (84.9%) perceived information about COPD disease as an essential component of PR, followed by smoking cessation 787 (80.3%). The most common patient-related factor that strongly influenced referral decisions was "mobility affected by breathlessness" (64%), while "availability of PR centres" (61%), "lack of trained HCPs" (52%) and "lack of authority to refer patients" (44%) were the most common barriers for referring.

**Conclusion:** PR is an effective management strategy for COPD patients, but sufficient PR centres, trained staff, and the authority to refer patients are lacking. An in-hospital supervised PR program is the preferred method of delivering PR, with information about COPD disease and smoking cessation being considered essential components of PR. Further research is needed to address physicians' and patients' attitudes and expectations toward delivering a PR program and identify factors and barriers of referring.

Keywords: PR, COPD, pulmonary rehabilitation, Saudi Arabia

### - Strengths and limitations of this study

1. To our knowledge, this is the first national study that explores HCPs' attitudes and beliefs toward delivering PR to COPD patients and identify factors and barriers that might influence referral in Saudi Arabia
2. Availability of PR centres, lack of trained HCPs and lack of authority to refer patients were the most common barriers for referring COPD patients to PR program

- 1
- 2
- 3
- 4 3. The study was conducted during the COVID-19 pandemic, which may have impacted
- 5 respondents' opinions.
- 6
- 7
- 8
- 9
- 10
- 11
- 12
- 13
- 14
- 15
- 16
- 17
- 18
- 19
- 20
- 21
- 22
- 23
- 24
- 25
- 26
- 27
- 28
- 29
- 30
- 31
- 32
- 33
- 34
- 35
- 36
- 37
- 38
- 39
- 40
- 41
- 42
- 43
- 44
- 45
- 46
- 47
- 48
- 49
- 50
- 51
- 52
- 53
- 54
- 55
- 56
- 57
- 58
- 59
- 60

For peer review only

## 1. Introduction

COPD is a common, preventable, and treatable disease characterized by airway and/or alveolar abnormalities, leading to airflow limitation and persistent pulmonary symptoms<sup>1</sup>. Patients with COPD are susceptible to daily symptoms, reduced exercise capacity and frequent chest infections that could result in deterioration of lung function and acceleration of disease progression, subsequently leading to emergency hospital admissions<sup>1 2</sup>. The prevalence of COPD in Saudi Arabia is ranging from 2.4% to 17.2% among adult who are 45years old and older<sup>3 4</sup>. In addition to pharmacologic approaches, the International Global Initiative for Obstructive Lung Disease (GOLD) stresses the importance of including non-pharmacologic interventions such as PR in the management of COPD symptoms as PR provides symptomatic improvement<sup>5 6</sup>, thereby reducing unnecessary hospital admissions.

PR is a comprehensive, multidisciplinary, non-pharmacologic intervention aimed at improving quality of life and exercise performance in patients with COPD<sup>6-8</sup>. PR usually consists of patient assessment, exercise training, and health education and is administered by a group of multidisciplinary healthcare providers. In Saudi Arabia, PR programs are often unavailable or underutilized<sup>9</sup>, likely due to the lack of trained staff who can manage patients with COPD<sup>10</sup>. In addition, PR services across the country must be conducted under close supervision by pulmonologists or internists with an interest in pulmonary medicine, although the number of chest physicians in Saudi Arabia is relatively low<sup>11 12</sup>. Consequently, an inadequate number of services are provided to meet the needs of patients with COPD.

International and national COPD management guidelines recommend increasing the implementation of PR programs worldwide by involving well-trained healthcare providers in the PR team<sup>7 11 12</sup>, considering that COPD is now perceived as a heterogeneous disease with multisystem manifestation that causes systemic consequences<sup>12</sup>. Despite the current contribution and involvement of experienced healthcare providers (e.g., nurses, respiratory

1  
2  
3 therapists, physiotherapists, psychologists, occupational therapists, and dietitians) in Saudi PR  
4 programs, awareness of and barriers to healthcare professionals in delivering PR programs in  
5 Saudi Arabia are largely unknown. Therefore, this study aims to explore healthcare  
6 professionals' attitudes and expectations toward delivering a PR program to patients with  
7 COPD in Saudi Arabia.  
8  
9  
10  
11  
12  
13  
14  
15  
16

## 17 **2. Methods**

### 18 *2.1. Study design*

19  
20 A cross-sectional survey was conducted through an online platform (Survey Monkey) between  
21 September 15, 2021, and January 19, 2022.  
22  
23  
24  
25  
26  
27  
28  
29

### 30 *2.2. Questionnaire tool*

31  
32 The survey was composed of nine multiple-choice closed questions and free text fields for  
33 additional comments; it was structured, formulated, and validated by multidisciplinary experts  
34 including nursing, respiratory therapy, physiotherapy, and nutrition in the field of PR based on  
35 the currently available literature<sup>7 13 14</sup>. Before the initial distribution, content and face validity  
36 were assessed after piloting the survey with ten healthcare professionals with a clinical  
37 background in COPD management.  
38  
39  
40  
41  
42  
43  
44  
45

46 Before participants started to answer the questionnaire, the aim of the study was provided,  
47 together with information about the lead investigator. Additionally, no personal information  
48 was recorded; voluntary participation was ensured by asking if participants were happy to  
49 complete the survey or not. An additional statement was provided in the survey: "By answering  
50 'yes' in completing the survey question, you voluntarily agree to participate in this study and  
51 give your consent to use your anonymous data for research purposes." The time required to  
52  
53  
54  
55  
56  
57  
58  
59  
60



1  
2  
3 complete the survey was approximately three to five minutes. The questionnaire consisted of  
4  
5 two pages of structured responses that involved multiple-choice answers in three sections.  
6  
7 Section 1 requested the respondents' demographic information, including gender, profession,  
8  
9 years of experience and responsibilities in the management of COPD. Section 2 consisted of  
10  
11 three questions asking about healthcare providers' perceptions of PR. The first question had  
12  
13 six statements regarding the effectiveness of PR with COPD patients and used a 5-point Likert  
14  
15 scale ranging from 1 = strongly disagree to 5 = strongly agree. The second question asked about  
16  
17 additional components of PR aside from the exercise component, and the third question was  
18  
19 about the best way to deliver PR for COPD patients. Section 3 included two questions regarding  
20  
21 patient-related factors that influence referral decisions and process-related factors that  
22  
23 influence the decision not to refer COPD patients. These questions used influence as a grading  
24  
25 tool: no influence, some influence and strong influence.  
26  
27  
28  
29  
30  
31  
32

### 33 2.3. *Study population and sampling strategy*

34  
35 Convenience sampling techniques were used to recruit the study participants. nurses,  
36  
37 respiratory therapists, physiotherapists, psychologists, occupational therapists, and nutritionists  
38  
39 involved in managing COPD patients or having potential contact with this population were the  
40  
41 main targets. Professional committees managing respiratory diseases and social networks  
42  
43 (Twitter, WhatsApp, and Telegram) were used to distribute the survey to reach a greater  
44  
45 number of HCPs working in Saudi Arabia.  
46  
47  
48  
49  
50

### 51 2.4. *Patient and Public Involvement statement*

52  
53 Patients were not involved.  
54  
55  
56  
57  
58

### 59 2.5. *Sample size*

1  
2  
3 Assuming a response distribution of 50%, the minimum sample size to conduct this research is  
4  
5 377, with a 5% margin of error and a 95% confidence level.  
6  
7  
8  
9

## 10 2.6. *Ethical approval*

11  
12 Institutional Review Board approval for the study was obtained from Jazan University,  
13  
14 reference number (HAPO-10-Z-001).  
15  
16  
17

## 18 2.7. *Statistical analysis*

19  
20 Data were collected and analysed using the Statistical Package for Social Sciences (SPSS  
21  
22 software, Version 25). The categorical variables were reported and presented in percentages  
23  
24 and frequencies. A Chi-square ( $\chi^2$ ) test was used to assess the statistically significant difference  
25  
26 and frequencies. A Chi-square ( $\chi^2$ ) test was used to assess the statistically significant difference  
27  
28 between categorical variables. Statistical significance was considered if the  $p < 0.05$ .  
29  
30  
31

## 32 3. Results

33  
34 Overall, 980 HCPs (520, or 53.1%, male and 460, or 46.9%, female) participated in the online  
35  
36 survey between September 9, 2021, and January 19, 2022. Nurses accounted for 40.1% of the  
37  
38 participants, followed by respiratory therapists (32.1%), physiotherapists (16.5%) and other  
39  
40 healthcare specialties (11.2%) such as nutritionists and occupational therapists. Most  
41  
42 respondents had one to two years of clinical experience in caring for COPD patients, while  
43  
44 26% had three to four years and 15.2% had five to six years. Oxygen therapy (57%), inpatient  
45  
46 treatment (47.1%), ongoing management (42.1%), diagnosis (38.9%), and outpatient clinics  
47  
48 (38.1%) were the main responsibilities for managing COPD patients (Table1).  
49  
50  
51  
52  
53  
54  
55  
56  
57  
58  
59  
60

**Table 1:** Demographic data and characteristics of all study respondents (n= 980).

| Demographic variables                        | Frequency (%) |
|----------------------------------------------|---------------|
| Gender                                       |               |
| Male                                         | 520 (53.1%)   |
| Female                                       | 460 (46.9%)   |
| Profession                                   |               |
| Nursing                                      | 393 (40.1%)   |
| Respiratory therapy                          | 315 (32.1%)   |
| Physiotherapy                                | 162 (16.5%)   |
| Others                                       | 110 (11.2%)   |
| Year of experience with COPD patients        |               |
| < 1 year                                     | 96 (9.8%)     |
| 1-2 years                                    | 294 (30%)     |
| 3-4 years                                    | 255 (26%)     |
| 5-6 years                                    | 149 (15.2%)   |
| 7-8 years                                    | 75 (7.7%)     |
| 9-10 years                                   | 47 (6.5%)     |
| >10 years                                    | 47 (4.8%)     |
| Responsibilities for care with COPD patients |               |
| Diagnosis                                    | 381 (38.9%)   |
| Urgent assessments                           | 350 (35.7%)   |
| Non-urgent care                              | 360 (36.7%)   |
| Ongoing management                           | 413 (42.1%)   |
| Admission prevention                         | 227 (23.2%)   |
| Medication check                             | 360 (36.7%)   |
| Prescribing                                  | 106 (10.8%)   |
| Oxygen therapy                               | 559 (57%)     |
| In patient treatment                         | 462 (47.1%)   |
| Outpatient clinics                           | 373 (38.1%)   |
| Primary care                                 | 282 (28.8%)   |

Data are presented as frequencies and percentages.

### 3.1. HCPs' opinions on referring COPD patients

Most HCPs strongly agreed that PR would improve COPD patients' exercise capacity (589, or 60.1%), and they strongly believed that PR would reduce symptoms of dyspnoea and fatigue (545, or 55.6%). In addition, most HCPs strongly agreed that PR would reduce levels of anxiety and depression (479, or 48.9%), and 571 (58.3%) strongly agreed that PR would improve patients' health-related quality of life. Moreover, 517 (52.8%) strongly agreed that PR would reduce hospital readmission, and 528 (53.9%) strongly agreed that PR would reduce the risk of future COPD exacerbation. Moreover, 440 HCPs (44.9%) strongly agreed that PR would

improve patients' nutritional status, and the majority strongly agreed that PR would improve disease self-management in COPD patients (589, or 60.1%) (Table 2).

### 3.2. Mode of delivery and components of PR

When asked about the preferred way to deliver a PR program for COPD patients, most HCPs believed that in-hospital supervised PR was the preferred method (748, or 76.3%), followed by delivering the PR at home (557, or 56.8%). However, only 275 (28.1%) believed that tailored PR with healthcare provider support over the phone would be the preferred method. Most HCPs believed that the essential components of PR include information about COPD (832, or 84.9%), followed by smoking cessation (787, or 80.3%) and COPD symptoms management (749, or 76.4%), aside from the exercise component (Table 3).

**Table 2:** Healthcare providers' perception on referring COPD patients to PR (n=980).

| Item                                                                      | Frequency (%) |
|---------------------------------------------------------------------------|---------------|
| <b>Perception on referring COPD patients to PR</b>                        |               |
| <i>I believe PR will improve patients' exercise capacity</i>              |               |
| Strongly agree                                                            | 589 (60.1%)   |
| Agree                                                                     | 260 (26.5%)   |
| Neutral                                                                   | 32 (3.3%)     |
| Disagree                                                                  | 8 (0.8%)      |
| Strongly disagree                                                         | 91 (9.3%)     |
| <i>I believe PR would reduce dyspnoea and fatigue</i>                     |               |
| Strongly agree                                                            | 545 (55.6%)   |
| Agree                                                                     | 297 (30.3%)   |
| Neutral                                                                   | 62 (6.3%)     |
| Disagree                                                                  | 25 (2.6%)     |
| Strongly disagree                                                         | 51 (5.2%)     |
| <i>I believe PR will improve patients' anxiety and depression</i>         |               |
| Strongly agree                                                            | 479 (48.9%)   |
| Agree                                                                     | 320 (32.7%)   |
| Neutral                                                                   | 105 (10.7%)   |
| Disagree                                                                  | 29 (3%)       |
| Strongly disagree                                                         | 47 (4.8%)     |
| <i>I believe PR will improve patients' health-related quality of life</i> |               |
| Strongly agree                                                            | 571 (58.3%)   |
| Agree                                                                     | 283 (28.9%)   |
| Neutral                                                                   | 57 (5.8%)     |
| Disagree                                                                  | 19 (1.9%)     |
| Strongly disagree                                                         | 50 (5.1%)     |
| <i>I believe PR will reduce the risk hospital readmission</i>             |               |
| Strongly agree                                                            | 517 (52.8%)   |

|                                                                      |             |
|----------------------------------------------------------------------|-------------|
| Agree                                                                | 317 (32.3%) |
| Neutral                                                              | 70 (7.1%)   |
| Disagree                                                             | 28 (2.9%)   |
| Strongly disagree                                                    | 48 (4.9%)   |
| <i>I believe PR will reduce the risk of future COPD exacerbation</i> |             |
| Strongly agree                                                       | 528 (53.9%) |
| Agree                                                                | 305 (31.1%) |
| Neutral                                                              | 78 (8%)     |
| Disagree                                                             | 18 (1.8%)   |
| Strongly disagree                                                    | 51 (5.2%)   |
| <i>I believe PR will improve patients' nutritional status</i>        |             |
| Strongly agree                                                       | 440 (44.9%) |
| Agree                                                                | 341 (34.8%) |
| Neutral                                                              | 117 (11.9%) |
| Disagree                                                             | 28 (2.9%)   |
| Strongly disagree                                                    | 54 (5.5%)   |
| <i>I believe PR will improve patients' disease self-management</i>   |             |
| Strongly agree                                                       | 589 (60.1%) |
| Agree                                                                | 260 (26.5%) |
| Neutral                                                              | 32 (3.3%)   |
| Disagree                                                             | 8 (0.8%)    |
| Strongly disagree                                                    | 91 (9.3%)   |

Data are presented as frequencies and percentages.

**Table 3:** Mode of delivery and component of PR (n=980).

| Item                                                            | Frequency (%) |
|-----------------------------------------------------------------|---------------|
| <b>The best way to deliver PR program for COPD patients</b>     |               |
| In hospital supervised program                                  | 748 (76.3%)   |
| At home                                                         | 557 (56.8%)   |
| Online program with healthcare provider support                 | 404 (41.2%)   |
| Tailored program with healthcare provider support through phone | 275 (28.1%)   |
| <b>Component of PR program aside from exercise component</b>    |               |
| Information about COPD disease                                  | 832 (84.9%)   |
| Smoking cessation                                               | 787 (80.3%)   |
| Symptoms management                                             | 749 (76.4%)   |
| Psychological support                                           | 671 (68.5%)   |
| Information about medications                                   | 648 (66.1%)   |
| Nutritional counselling                                         | 526 (53.7%)   |

Data are presented as frequencies and percentages.

### 3.3. Patient-related factors that influence referral decisions to PR

The main factors that strongly influenced the decision to refer COPD patients to PR from the HCPs' perspective included mobility affected by patients' breathlessness (64.10%), followed by low activity levels (61.60%), low exercise tolerance (58.20%), patient fatigue related to COPD (52.90%), and patient anxiety related to COPD (50.70%) (Figure 1).

### 3.4. PR referral barriers

From the HCPs' perspective, the main barriers that strongly affect the referral process for COPD patients included a lack of available PR centres (61.80%), followed by a lack of trained HCPs who could manage COPD patients (52.70%) and the lack of authority to refer a patient (44.30%). In addition, 43% reported that patients might refuse the referral process (Figure 2).

## 4. Discussion

To the best of our knowledge, this is the first national study that explores HCPs' attitudes and beliefs about PR programs in Saudi Arabia. Findings show a consensus on the benefits of PR in improving clinical outcomes in COPD. While a supervised hospital-based program was seen as the preferred mode of delivery, the lack of PR centres, well-trained staff, and the authority to refer posed significant barriers to PR referrals. HCPs perceived patients' education about COPD and smoking cessation as the most essential components to be incorporated into a PR program.

PR has established a solid position as the cornerstone of the management of patients with COPD. Indeed, current evidence shows that PR alleviates exercise limitations and dyspnoea, improves nutritional status and psychological well-being, and reduces hospitalizations, future COPD exacerbations, and mortality rates<sup>7 15 16</sup>. Despite this, the global referral rate is currently suboptimal<sup>17 18</sup>. Current international COPD guidelines recommend the involvement of HCPs in the referral of COPD patients; however, referral to PR is solely undertaken by physicians in Saudi Arabia<sup>18-22</sup>. In the current study, nearly half of the participants believed that a lack of authority to refer posed a significant barrier to PR referral. Empowering HCPs who are part of the PR team and COPD management to refer patients in need of PR treatment may increase the referral rate and thus improve clinical outcomes.

1  
2  
3 Reasons for not referring patients with COPD to PR programs are likely to be multifactorial;  
4 lack of available PR centres is at top of the list, as shown in this study. Saudi Arabia has a  
5  
6 limited number of PR centres, and the number of people who can access these centres is  
7  
8 extremely low<sup>9</sup>. This contrasts, for instance, with the situation in the UK, which has 228 PR  
9  
10 services. The gap in the current practice is therefore clear, and the establishment of new PR  
11  
12 programs needs to be facilitated across the country. It is however important to mention that PR  
13  
14 programs can be offered within the existing infrastructure using the incumbent HCPs in the  
15  
16 hospitals<sup>23</sup>. It has been previously demonstrated that an outpatient PR program offered at a  
17  
18 small hospital is as effective as a program offered in a large hospital<sup>24</sup>. Current evidence also  
19  
20 suggests that PR can be effectively offered using different modalities, including inpatient,  
21  
22 community-based, home settings or online<sup>24 25</sup>. Thus, any of these modes of delivery can be  
23  
24 adopted according to the hospital's available resources.  
25  
26  
27  
28  
29

30 Participants in this study also perceived the lack of well-trained staff as a major barrier to PR  
31  
32 referral, in concordance with the current literature<sup>18 19</sup>. Studies show that Saudi Arabia suffers  
33  
34 from a severe shortage of healthcare professionals and that only limited specialties participate  
35  
36 in the management of COPD<sup>26 27</sup>. Evidence suggests that COPD management is much better if  
37  
38 performed by a multidisciplinary team<sup>27 28</sup>, highlighting the need for an integrated approach. It  
39  
40 is however important to mention that the number of specialized physicians and healthcare  
41  
42 professionals (e.g., respiratory nurses and respiratory physiotherapists) is, overall, low<sup>26 27</sup>,  
43  
44 which could affect the quality of COPD care in the country. Therefore, the healthcare authority  
45  
46 in Saudi Arabia should take action to reduce the current shortage by providing training  
47  
48 incentives to people willing to specialize in respiratory medicine and encouraging the  
49  
50 upskilling of current healthcare workers. In addition, offering high-quality education either  
51  
52 inside or outside the country could be a useful approach to stimulate this change.  
53  
54  
55  
56  
57  
58  
59  
60

1  
2  
3 Almost 80% of HCPs in this study considered supervised hospital-based programs the  
4 preferred mode of PR delivery, despite the limited number of PR centres in the country. This  
5 is likely because of a lack of knowledge about PR services in Saudi Arabia, as only a small  
6 proportion of HCPs know what PR is<sup>10</sup>. However, utilizing the available resources within the  
7 infrastructure of the hospital remains possible for setting up and delivering a PR program.  
8 Alternatively, home settings, which are as effective as conventional PR programs in improving  
9 exercise capacity and respiratory symptoms<sup>29</sup>, could be considered a viable option.

10  
11 In this study, most HCPs believed that information about COPD and smoking cessation are the  
12 most important components of a PR program. Indeed, disease-related education contributes to  
13 patients' recognition of their symptoms and worsening disease<sup>30</sup>. However, the content of the  
14 PR educational program, who delivers it, and how it is delivered remain unclear. According to  
15 the ATS/ERS official consensus, smoking cessation is a major component of a PR program<sup>13</sup>  
16  
17  
18  
19  
20  
21  
22  
23  
24  
25  
26  
27  
28  
29  
30  
31  
32  
33  
34  
35  
36  
37  
38  
39  
40  
41  
42  
43  
44  
45  
46  
47  
48  
49  
50  
51  
52  
53  
54  
55  
56  
57  
58  
59  
60

14. It is the primary cause of COPD, with the prevalence of COPD smokers ranging from 38%  
to 77%<sup>31</sup>. In addition, smoking contributes to 73% of COPD-related deaths worldwide<sup>32</sup>.  
Smoking is also associated with accelerated lung function declines, higher COPD  
exacerbations<sup>33 34</sup>, and increased dropout rates from PR. Therefore, support for smoking  
cessation should be offered throughout the PR program.

#### 4.1. *Strengths and limitations*

Convenience sample techniques were used in the study, which may impose a selection bias,  
although *a priori* desired level of power was met. In this study, we did not survey or  
interview physicians who are part of COPD management. Finally, the study was conducted  
during the COVID-19 pandemic, which may have impacted respondents' opinions.



## 5. Conclusion

HCPs across specialties agreed on the effectiveness of PR. A supervised hospital-based program was the preferred mode of PR delivery although limited PR services existed. Lack of PR centres, well-trained staff, and the authority to refer were major barriers to referring COPD patients. Patients' education and smoking cessation were perceived as essential components of the PR program, in addition to the exercise component.

### Contributors

The study was designed by A.M.A., M.A., and J.S.A. Data collection was performed by A.A.A, I.A.A, H.W, and A.S.A, statistical methodology was performed by A.M.A, and formal analysis was performed by A.H, Y.S.A and S.M.A. The draft of the manuscript was written by A.M.A, A.A.A, I.A.A, R.A.S, and M.A, and reviewed and revised by J.S.A, H.W and S.M.A. All authors approved the paper for publication.

**Funding:** This research received no specific grant from any funding agency in the public, commercial or not-for-profit sectors

**Competing interests:** None declared.

**Patient consent for publication:** Not required

**Ethics approval:** Institutional Review Board approval for the study was obtained from Jazan University, reference number (HAPO-10-Z-001).

**Provenance and peer review:** Not commissioned; externally peer reviewed.

**Data availability statement:** Data are available on reasonable request.

## References

1. Halpin DMG, Criner GJ, Papi A, et al. Global Initiative for the Diagnosis, Management, and Prevention of Chronic Obstructive Lung Disease. The 2020 GOLD Science Committee Report on COVID-19 and Chronic Obstructive Pulmonary Disease. *Am J Respir Crit Care Med* 2021;203(1):24-36. doi: 10.1164/rccm.202009-3533SO [published Online First: 2020/11/05]
2. Alqahtani JS, Njoku CM, Bereznicki B, et al. Risk factors for all-cause hospital readmission following exacerbation of COPD: a systematic review and meta-analysis. *Eur Respir Rev* 2020;29(156) doi: 10.1183/16000617.0166-2019 [published Online First: 2020/06/06]
3. Wali SO, Idrees MM, Alamoudi OS, et al. Prevalence of chronic obstructive pulmonary disease in Saudi Arabia. *Saudi Med J* 2014;35(7):684-90. [published Online First: 2014/07/17]
4. Al Ghobain M, Al-Hajjaj Mohamed S, Wali Siraj O. Prevalence of chronic obstructive pulmonary disease among smokers attending primary healthcare clinics in Saudi Arabia. *Annals of Saudi Medicine* 2011;31(2):129-33. doi: 10.4103/0256-4947.77485
5. von Trott P, Oei SL, Ramsenthaler C. Acupuncture for Breathlessness in Advanced Diseases: A Systematic Review and Meta-analysis. *J Pain Symptom Manage* 2020;59(2):327-38 e3. doi: 10.1016/j.jpainsymman.2019.09.007 [published Online First: 2019/09/21]
6. Evans RA, Singh SJ. Minimum important difference of the incremental shuttle walk test distance in patients with COPD. *Thorax* 2019;74(10):994-95. doi: 10.1136/thoraxjnl-2018-212725 [published Online First: 2019/05/31]
7. Spruit MA, Singh SJ, Garvey C, et al. An official American Thoracic Society/European Respiratory Society statement: key concepts and advances in pulmonary rehabilitation. *Am J Respir Crit Care Med* 2013;188(8):e13-64. doi: 10.1164/rccm.201309-1634ST [published Online First: 2013/10/17]
8. Sahin H, Naz I, Varol Y, et al. Is a pulmonary rehabilitation program effective in COPD patients with chronic hypercapnic failure? *Expert review of respiratory medicine* 2016;10(5):593-8. doi: 10.1586/17476348.2016.1164041 [published Online First: 2016/03/10]
9. Aldhahir AM, Alghamdi SM, Alqahtani JS, et al. Pulmonary rehabilitation for COPD: A narrative review and call for further implementation in Saudi Arabia. *Ann Thorac Med* 2021;16(4):299-305. doi: 10.4103/atm.atm\_639\_20 [published Online First: 2021/11/26]
10. Alsubaiei ME, Cafarella PA, Frith PA, et al. Barriers for setting up a pulmonary rehabilitation program in the Eastern Province of Saudi Arabia. *Ann Thorac Med* 2016;11(2):121-7. doi: 10.4103/1817-1737.180028 [published Online First: 2016/05/12]
11. Khan JH, Lababidi HM, Al-Moamary MS, et al. The Saudi Guidelines for the Diagnosis and Management of COPD. *Ann Thorac Med* 2014;9(2):55-76. doi: 10.4103/1817-1737.128843 [published Online First: 2014/05/03]
12. Celli BR, Decramer M, Wedzicha JA, et al. An Official American Thoracic Society/European Respiratory Society Statement: Research questions in chronic obstructive pulmonary disease. *Am J Respir Crit Care Med* 2015;191(7):e4-e27. doi: 10.1164/rccm.201501-0044ST

13. Hill K, Vogiatzis I, Burtin C. The importance of components of pulmonary rehabilitation, other than exercise training, in COPD. *European Respiratory Review* 2013;22(129):405. doi: 10.1183/09059180.00002913
14. Holland AE, Cox NS, Houchen-Wolloff L, et al. Defining Modern Pulmonary Rehabilitation. An Official American Thoracic Society Workshop Report. *Annals of the American Thoracic Society* 2021;18(5):e12-e29. doi: 10.1513/AnnalsATS.202102-146ST
15. Vogelmeier CF, Criner GJ, Martinez FJ, et al. Global strategy for the diagnosis, management, and prevention of chronic obstructive lung disease 2017 report. *American Journal of Respiratory and Critical Care Medicine* 2017;195(5):557-82.
16. Aldhahir AM, Rajeh AMA, Aldabayan YS, et al. Nutritional supplementation during pulmonary rehabilitation in COPD: A systematic review. *Chron Respir Dis* 2020;17:1479973120904953. doi: 10.1177/1479973120904953 [published Online First: 2020/02/15]
17. Milner SC, Boruff JT, Beaupaire C, et al. Rate of, and barriers and enablers to, pulmonary rehabilitation referral in COPD: A systematic scoping review. *Respir Med* 2018;137:103-14. doi: 10.1016/j.rmed.2018.02.021 [published Online First: 2018/04/02]
18. Johnston KN, Young M, Grimmer KA, et al. Barriers to, and facilitators for, referral to pulmonary rehabilitation in COPD patients from the perspective of Australian general practitioners: a qualitative study. *Primary Care Respiratory Journal* 2013;22(3):319-24. doi: 10.4104/pcrj.2013.00062
19. Rochester CL, Vogiatzis I, Holland AE, et al. An Official American Thoracic Society/European Respiratory Society Policy Statement: Enhancing Implementation, Use, and Delivery of Pulmonary Rehabilitation. *American Journal of Respiratory and Critical Care Medicine* 2015;192(11):1373-86. doi: 10.1164/rccm.201510-1966ST
20. Hogg L, Garrod R, Thornton H, et al. Effectiveness, Attendance, and Completion of an Integrated, System-Wide Pulmonary Rehabilitation Service for COPD: Prospective Observational Study. *COPD: Journal of Chronic Obstructive Pulmonary Disease* 2012;9(5):546-54. doi: 10.3109/15412555.2012.707258
21. Bolton CE, Bevan-Smith EF, Blakey JD, et al. British Thoracic Society guideline on pulmonary rehabilitation in adults: accredited by NICE. *Thorax* 2013;68(Suppl 2):ii1. doi: 10.1136/thoraxjnl-2013-203808
22. Khan JH, Lababidi HMS, Al-Moamary MS, et al. The Saudi Guidelines for the Diagnosis and Management of COPD. *Annals of thoracic medicine* 2014;9(2):55-76. doi: 10.4103/1817-1737.128843
23. Jenkins S, Hill K, Cecins NM. State of the art: how to set up a pulmonary rehabilitation program. *Respirology* 2010;15(8):1157-73. doi: 10.1111/j.1440-1843.2010.01849.x [published Online First: 2010/10/06]
24. Ward JA, Akers G, Ward DG, et al. Feasibility and effectiveness of a pulmonary rehabilitation programme in a community hospital setting. *Br J Gen Pract* 2002;52(480):539-42. [published Online First: 2002/07/18]
25. Maltais F, Bourbeau J, Shapiro S, et al. Effects of home-based pulmonary rehabilitation in patients with chronic obstructive pulmonary disease: a randomized trial. *Ann Intern Med* 2008;149(12):869-78. doi: 10.7326/0003-4819-149-12-200812160-00006 [published Online First: 2008/12/17]

- 1  
2  
3  
4  
5  
6  
7  
8  
9  
10  
11  
12  
13  
14  
15  
16  
17  
18  
19  
20  
21  
22  
23  
24  
25  
26  
27  
28  
29  
30  
31  
32  
33  
34  
35  
36  
37  
38  
39  
40  
41  
42  
43  
44  
45  
46  
47  
48  
49  
50  
51  
52  
53  
54  
55  
56  
57  
58  
59  
60
26. Aboshaiqah A. Strategies to address the nursing shortage in Saudi Arabia. *International Nursing Review* 2016;63(3):499-506. doi: <https://doi.org/10.1111/inr.12271>
  27. Alsubaiei M, Cafarella P, Frith P, et al. Factors influencing management of chronic respiratory diseases in general and chronic obstructive pulmonary disease in particular in Saudi Arabia: An overview. *Annals of Thoracic Medicine* 2018;13(3):144-49. doi: 10.4103/atm.ATM\_293\_17
  28. Kuzma AM, Meli Y, Meldrum C, et al. Multidisciplinary care of the patient with chronic obstructive pulmonary disease. *Proc Am Thorac Soc* 2008;5(4):567-71. doi: 10.1513/pats.200708-125ET
  29. McCarthy B, Casey D, Devane D, et al. Pulmonary rehabilitation for chronic obstructive pulmonary disease. *Cochrane Database Syst Rev* 2015(2):Cd003793. doi: 10.1002/14651858.CD003793.pub3 [published Online First: 2015/02/24]
  30. Crisafulli E, Loschi S, Beneventi C, et al. Learning impact of education during pulmonary rehabilitation program. An observational short-term cohort study. *Monaldi Arch Chest Dis* 2010;73(2):64-71. doi: 10.4081/monaldi.2010.300 [published Online First: 2010/10/19]
  31. Tønnesen P. Smoking cessation and COPD. *European Respiratory Review* 2013;22(127):37. doi: 10.1183/09059180.00007212
  32. MacNee W. Chronic obstructive pulmonary disease. 5 ed: Oxford University Press 2010.
  33. Badaran E, Ortega E, Bujalance C, et al. Smoking and COPD exacerbations. *European Respiratory Journal* 2012;40(Suppl 56):P1055.
  34. Brown AT, Hitchcock J, Schumann C, et al. Determinants of successful completion of pulmonary rehabilitation in COPD. *International journal of chronic obstructive pulmonary disease* 2016;11:391-97. doi: 10.2147/COPD.S100254

### Figure legend:

**Figure 1:** Patient-related factors that influence referral decision to PR, using strong, some or no influence grading.

**Figure 2:** Barriers to referring COPD patients to PR from HCPs perspective, using strong, some or no influence grading.

1  
2  
3  
4  
5  
6  
7  
8  
9  
10  
11  
12  
13  
14  
15  
16  
17  
18  
19  
20  
21  
22  
23  
24  
25  
26  
27  
28  
29  
30  
31  
32  
33  
34  
35  
36  
37  
38  
39  
40  
41  
42  
43  
44  
45  
46  
47  
48  
49  
50  
51  
52  
53  
54  
55  
56  
57  
58  
59  
60

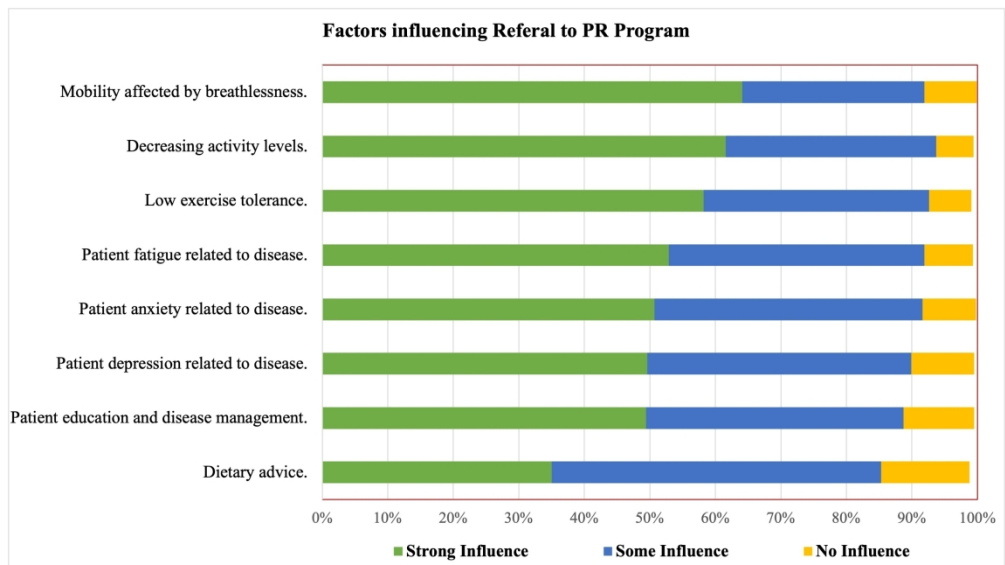

Patient-related factors that influence referral decision to PR, using strong, some or no influence grading.

247x139mm (300 x 300 DPI)

1  
2  
3  
4  
5  
6  
7  
8  
9  
10  
11  
12  
13  
14  
15  
16  
17  
18  
19  
20  
21  
22  
23  
24  
25  
26  
27  
28  
29  
30  
31  
32  
33  
34  
35  
36  
37  
38  
39  
40  
41  
42  
43  
44  
45  
46  
47  
48  
49  
50  
51  
52  
53  
54  
55  
56  
57  
58  
59  
60

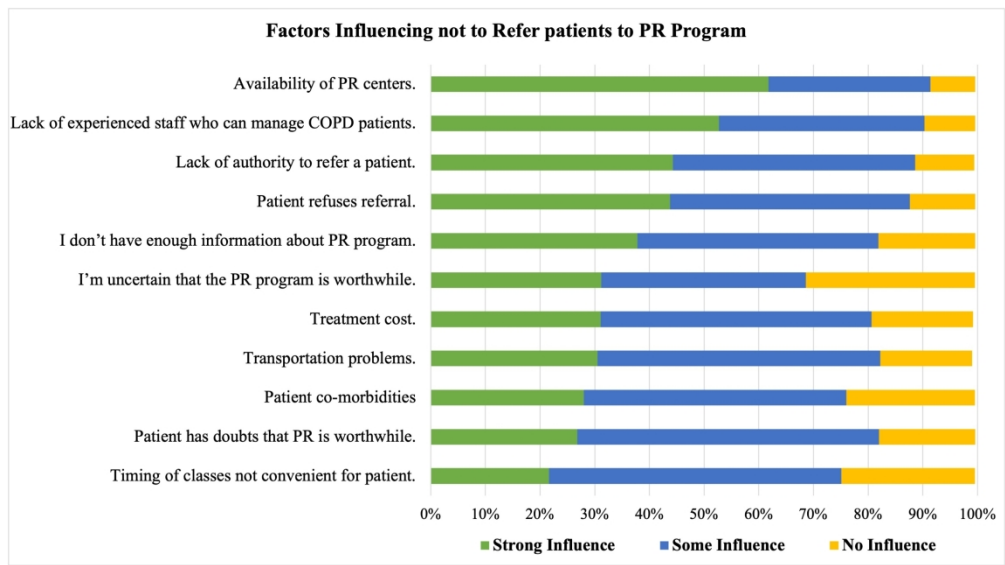

Barriers to referring COPD patients to PR from HCPs perspective, using strong, some or no influence grading.

247x138mm (300 x 300 DPI)

# BMJ Open

## Healthcare Providers' Attitudes, Beliefs and Barriers to Pulmonary Rehabilitation for Chronic Obstructive Pulmonary Disease Patients in Saudi Arabia: A Cross-Sectional Study

|                                 |                                                                                                                                                                                                                                                                                                                                                                                                                                                                                                                                                                                                                                                                                                                                                                                                                                                                                                                                                                                                                                                                                                                                                                                                                                                                                                                                                                                                                                                                                                                                                                                                                                                                                                                                                        |
|---------------------------------|--------------------------------------------------------------------------------------------------------------------------------------------------------------------------------------------------------------------------------------------------------------------------------------------------------------------------------------------------------------------------------------------------------------------------------------------------------------------------------------------------------------------------------------------------------------------------------------------------------------------------------------------------------------------------------------------------------------------------------------------------------------------------------------------------------------------------------------------------------------------------------------------------------------------------------------------------------------------------------------------------------------------------------------------------------------------------------------------------------------------------------------------------------------------------------------------------------------------------------------------------------------------------------------------------------------------------------------------------------------------------------------------------------------------------------------------------------------------------------------------------------------------------------------------------------------------------------------------------------------------------------------------------------------------------------------------------------------------------------------------------------|
| Journal:                        | <i>BMJ Open</i>                                                                                                                                                                                                                                                                                                                                                                                                                                                                                                                                                                                                                                                                                                                                                                                                                                                                                                                                                                                                                                                                                                                                                                                                                                                                                                                                                                                                                                                                                                                                                                                                                                                                                                                                        |
| Manuscript ID                   | bmjopen-2022-063900.R1                                                                                                                                                                                                                                                                                                                                                                                                                                                                                                                                                                                                                                                                                                                                                                                                                                                                                                                                                                                                                                                                                                                                                                                                                                                                                                                                                                                                                                                                                                                                                                                                                                                                                                                                 |
| Article Type:                   | Original research                                                                                                                                                                                                                                                                                                                                                                                                                                                                                                                                                                                                                                                                                                                                                                                                                                                                                                                                                                                                                                                                                                                                                                                                                                                                                                                                                                                                                                                                                                                                                                                                                                                                                                                                      |
| Date Submitted by the Author:   | 09-Jun-2022                                                                                                                                                                                                                                                                                                                                                                                                                                                                                                                                                                                                                                                                                                                                                                                                                                                                                                                                                                                                                                                                                                                                                                                                                                                                                                                                                                                                                                                                                                                                                                                                                                                                                                                                            |
| Complete List of Authors:       | <p>Aldhahir, Abdulelah; Jazan University, Faculty of Applied Medical Sciences, Respiratory Therapy Department<br/>         Alqahtani , Jaber S. ; Prince Sultan Military College of Health Sciences, Department of Respiratory Care<br/>         AlDraiwiesh, Ibrahim; Prince Sultan Military College of Health Sciences, Department of Respiratory Care<br/>         Alghamdi, Saeed; Umm Al-Qura University College of Applied Medical Science, Clinical Technology Department, Respiratory Care Program; Imperial College London, National Heart and Lung Institute<br/>         Alsulayyim, Abdullah; Imperial College London, National Heart and Lung Institute; Jazan University, Faculty of Applied Medical Sciences<br/>         Alqarni, Abdullah; King Abdulaziz University, Department of Respiratory Therapy, Faculty of Medical Rehabilitation Sciences<br/>         Alhotye, Munyra; King Saud bin Abdulaziz University for Health Sciences College of Applied Medical Sciences, Department of Respiratory Therapy<br/>         Alwafi, Hassan; Umm Al-Qura University College of Medicine, Faculty of Medicine<br/>         Siraj, Rayan; King Faisal University, Department of Respiratory Therapy, College of Applied Medical Sciences<br/>         Alrajeh, Ahmed; King Faisal University, Department of Respiratory Therapy, College of Applied Medical Sciences<br/>         Aldabayan, Yousef; King Faisal University, Department of Respiratory Therapy, College of Applied Medical Sciences<br/>         Alzahrani, Eidan ; Prince Sultan Military College of Health Sciences, Department of Physiotherapy<br/>         Hakamy, Ali ; Jazan University, Respiratory Therapy Department, Faculty of Applied Medical Sciences</p> |
| <b>Primary Subject Heading</b>: | Rehabilitation medicine                                                                                                                                                                                                                                                                                                                                                                                                                                                                                                                                                                                                                                                                                                                                                                                                                                                                                                                                                                                                                                                                                                                                                                                                                                                                                                                                                                                                                                                                                                                                                                                                                                                                                                                                |
| Secondary Subject Heading:      | Rehabilitation medicine                                                                                                                                                                                                                                                                                                                                                                                                                                                                                                                                                                                                                                                                                                                                                                                                                                                                                                                                                                                                                                                                                                                                                                                                                                                                                                                                                                                                                                                                                                                                                                                                                                                                                                                                |
| Keywords:                       | REHABILITATION MEDICINE, RESPIRATORY MEDICINE (see Thoracic Medicine), Chronic airways disease < THORACIC MEDICINE                                                                                                                                                                                                                                                                                                                                                                                                                                                                                                                                                                                                                                                                                                                                                                                                                                                                                                                                                                                                                                                                                                                                                                                                                                                                                                                                                                                                                                                                                                                                                                                                                                     |
|                                 |                                                                                                                                                                                                                                                                                                                                                                                                                                                                                                                                                                                                                                                                                                                                                                                                                                                                                                                                                                                                                                                                                                                                                                                                                                                                                                                                                                                                                                                                                                                                                                                                                                                                                                                                                        |

1  
2  
3  
4  
5  
6  
7  
8  
9  
10  
11  
12  
13  
14  
15  
16  
17  
18  
19  
20  
21  
22  
23  
24  
25  
26  
27  
28  
29  
30  
31  
32  
33  
34  
35  
36  
37  
38  
39  
40  
41  
42  
43  
44  
45  
46  
47  
48  
49  
50  
51  
52  
53  
54  
55  
56  
57  
58  
59  
60

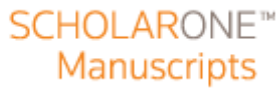





I, the Submitting Author has the right to grant and does grant on behalf of all authors of the Work (as defined in the below author licence), an exclusive licence and/or a non-exclusive licence for contributions from authors who are: i) UK Crown employees; ii) where BMJ has agreed a CC-BY licence shall apply, and/or iii) in accordance with the terms applicable for US Federal Government officers or employees acting as part of their official duties; on a worldwide, perpetual, irrevocable, royalty-free basis to BMJ Publishing Group Ltd ("BMJ") its licensees and where the relevant Journal is co-owned by BMJ to the co-owners of the Journal, to publish the Work in this journal and any other BMJ products and to exploit all rights, as set out in our [licence](#).

The Submitting Author accepts and understands that any supply made under these terms is made by BMJ to the Submitting Author unless you are acting as an employee on behalf of your employer or a postgraduate student of an affiliated institution which is paying any applicable article publishing charge ("APC") for Open Access articles. Where the Submitting Author wishes to make the Work available on an Open Access basis (and intends to pay the relevant APC), the terms of reuse of such Open Access shall be governed by a Creative Commons licence – details of these licences and which [Creative Commons](#) licence will apply to this Work are set out in our licence referred to above.

Other than as permitted in any relevant BMJ Author's Self Archiving Policies, I confirm this Work has not been accepted for publication elsewhere, is not being considered for publication elsewhere and does not duplicate material already published. I confirm all authors consent to publication of this Work and authorise the granting of this licence.

1  
2  
3 **1 Healthcare Providers' Attitudes, Beliefs and Barriers to Pulmonary**  
4  
5  
6 **2 Rehabilitation for Chronic Obstructive Pulmonary Disease Patients in Saudi**  
7  
8  
9 **3 Arabia: A Cross-Sectional Study**  
10  
11  
12 **4**

13 5 Abdulelah M. Aldhahir <sup>1</sup>  
14 6 Jaber S. Alqahtani<sup>2</sup>  
15 7 Ibrahim A. Aldraiwiash<sup>2</sup>  
16 8 Saeed M. Alghamdi<sup>3,4</sup>  
17 9 Abdullah S. Alsulayyim<sup>1,4</sup>  
18 10 Abdullah A. Alqarni <sup>5</sup>  
19 11 Munyra Alhotye<sup>6</sup>  
20 12 Hassan Alwafi<sup>7</sup>  
21 13 Rayan A. Siraj<sup>8</sup>  
22 14 Ahmed M. Al Rajeh<sup>8</sup>  
23 15 Yousef S. Aldabayan<sup>8</sup>  
24 16 Edan M. Alzahrani<sup>9</sup>  
25 17 Ali Hakamy<sup>1</sup>  
26  
27  
28  
29  
30

31 <sup>1</sup>Respiratory Therapy Department, Faculty of Applied Medical Sciences, Jazan University, Jazan, Saudi  
32 Arabia; <sup>2</sup>Department of Respiratory Care, Prince Sultan Military College of Health Sciences, Dammam,  
33 Saudi Arabia; <sup>3</sup>Clinical Technology Department, Respiratory Care Program, Faculty of Applied Medical  
34 Sciences, Umm Al-Qura University, Makkah, Saudi Arabia; <sup>4</sup>National Heart and Lung Institute, Imperial  
35 College London, UK; <sup>5</sup>Department of Respiratory Therapy, Faculty of Medical Rehabilitation Sciences,  
36 King Abdulaziz University, Jeddah, Saudi Arabia; <sup>6</sup>Department of Respiratory Therapy, King Saud Bin  
37 Abdulaziz University for Health Sciences, Riyadh, Saudi Arabia; <sup>7</sup>Faculty of Medicine, Umm Al-Qura  
38 University, Mecca, Saudi Arabia; <sup>8</sup>Department of Respiratory Therapy, College of Applied Medical  
39 Sciences, King Faisal University, Al-Hasa, Saudi Arabia; Department of Physiotherapy, Prince Sultan  
40 Military College of Health Sciences, Dammam, Saudi Arabia  
41  
42  
43  
44  
45  
46  
47  
48  
49  
50  
51  
52  
53  
54  
55  
56  
57  
58  
59  
60

31  
32  
33  
34 **Word count: 2675**  
35  
36  
37

38 Corresponding Author:  
39 Abdulelah Mastour Aldhahir, PhD  
40 Respiratory Therapy Department  
41 Faculty of Applied Medical Sciences  
42 Jazan University  
43 Saudi Arabia  
44 Phone: +966557775561  
45 Email: [Aldhahir.abdulelah@hotmail.com](mailto:Aldhahir.abdulelah@hotmail.com)

## 46 Abstract

47 **Objectives:** To assess Healthcare Providers (HCPs) attitudes toward delivering Pulmonary  
48 rehabilitation (PR) to Chronic obstructive pulmonary disease (COPD) patients, and identify  
49 factors and barriers that might influence referral.

50 **Design:** A cross-sectional online survey consisted of nine multiple-choice questions.

51 **Settings:** Kingdom of Saudi Arabia.

52 **Participants:** 980 HCPs included nurses, respiratory therapists, and physiotherapists.

53 **Primary outcome measures:** HCPs attitudes and expectations toward delivering PR to COPD  
54 patients and identify factors and barriers that might influence referral in Saudi Arabia

55 **Results:** Overall, 980 HCPs, (53.1%) male, completed the online survey. Nurses accounted for  
56 40.1% of the total sample size, respiratory therapists and physiotherapists accounted for 32.1%  
57 and 16.5%, respectively. The majority of HCPs strongly agreed that PR would improve  
58 exercise capacity 589 (60.1%), health-related quality of life 571 (58.3%), and disease self-  
59 management in COPD patients 589 (60.1%). Moreover, in-hospital supervised PR program  
60 was the preferred method of delivering PR according to 374 (38.16%) HCPs. Around 85% of  
61 HCPs perceived information about COPD disease, followed by smoking cessation 787 (80.3%)  
62 and symptoms management 749 (76.4%) as essential components of PR next to exercise  
63 component. The most common patient-related factor that strongly influenced referral decisions  
64 was "mobility affected by breathlessness" (64%), while "availability of PR centres" (61%),  
65 "lack of trained HCPs" (52%) and "lack of authority to refer patients" (44%) were the most  
66 common barriers for referring.

67 **Conclusion:** PR is an effective management strategy for COPD patients, but sufficient PR  
68 centres, trained staff, and the authority to refer patients are lacking. An in-hospital supervised  
69 PR program is the preferred method of delivering PR, with information about COPD disease,  
70 smoking cessation and symptoms management being considered essential components of PR  
71 in addition to exercise component. Further research is needed to address patients' attitudes and  
72 expectations toward delivering PR program and identify factors and barriers of referring.

73

74

75 **Keywords:** PR, COPD, pulmonary rehabilitation, Saudi Arabia

76

77

78

1  
2  
3  
4 79 - **Strengths and limitations of this study**  
5

- 6 80 1. To our knowledge, this is the first national study that explores HCPs' attitudes and beliefs  
7 81 toward delivering PR to COPD patients and identify factors and barriers that might  
8 82 influence referral in Saudi Arabia  
9 83 2. Availability of PR centres, lack of trained HCPs and lack of authority to refer patients were  
10 84 the most common barriers for referring COPD patients to PR program  
11 85 3. The study was conducted during the COVID-19 pandemic, which may have impacted  
12 86 respondents' opinions.  
13  
14  
15  
16  
17  
18  
19  
20  
21  
22  
23  
24  
25  
26  
27  
28  
29  
30  
31  
32  
33  
34  
35  
36  
37  
38  
39  
40  
41  
42  
43  
44  
45  
46  
47  
48  
49  
50  
51  
52  
53  
54  
55  
56  
57  
58  
59  
60

For peer review only

## 1. Introduction

COPD is a common, preventable, and treatable disease characterized by airway and/or alveolar abnormalities, leading to airflow limitation and persistent pulmonary symptoms[1]. Patients with COPD are susceptible to daily symptoms, reduced exercise capacity and frequent chest infections that could result in deterioration of lung function and acceleration of disease progression, subsequently leading to emergency hospital admissions[1, 2]. In addition to pharmacologic approaches, the International Global Initiative for Obstructive Lung Disease (GOLD) stresses the importance of including non-pharmacologic interventions such as PR in the management of COPD symptoms as PR provides symptomatic improvement[3, 4], thereby reducing unnecessary hospital admissions.

PR is a comprehensive, multidisciplinary, non-pharmacologic intervention aimed at improving quality of life and exercise performance in patients with COPD[4-6]. PR usually consists of patient assessment with an exercise test and dyspnoea assessment, exercise training that includes endurance and resistance training, quality of life measure, nutritional with occupational evaluation and health education and is administered by a group of multidisciplinary healthcare providers[7].

There has been an increasing trend in Saudi Arabia's prevalence and incidence of COPD from 1990 to 2019 [8]. In 2019, it has been estimated that around 434,560 people had COPD in the Kingdom of Saudi Arabia[8]. This study shows that the burden of COPD is increasing, and public health policy is necessary to offset this trend. PR programs are an example of community-based primary care management that must be implemented to lessen such a burden [8]. However, in Saudi Arabia, PR programs are often unavailable or underutilized [9], likely due to the lack of trained staff who can manage patients with COPD[10]. In addition, PR services across the country must be conducted under close supervision by pulmonologists or internists with an interest in pulmonary medicine, although the number of chest physicians in

1  
2  
3 112 Saudi Arabia is relatively low[11, 12]. Consequently, an inadequate number of services are  
4  
5 113 provided to meet the needs of patients with COPD.  
6  
7  
8 114 International and national COPD management guidelines recommend increasing the  
9  
10 115 implementation of PR programs worldwide by involving well-trained healthcare providers in  
11  
12 116 the PR team[5, 11, 12], considering that COPD is now perceived as a heterogeneous disease  
13  
14 117 with multisystem manifestation that causes systemic consequences[12]. Despite the current  
15  
16 118 contribution and involvement of experienced healthcare providers (e.g., nurses, respiratory  
17  
18 119 therapists, physiotherapists, psychologists, occupational therapists, and dietitians) in Saudi PR  
19  
20 120 programs, awareness of and barriers to healthcare professionals in delivering PR programs in  
21  
22 121 Saudi Arabia are limited. Recently, we have conducted a study to assess pulmonologists',  
23  
24 122 internal medicine', general physicians' attitudes toward delivering PR to COPD patients and  
25  
26 123 to identify factors and barriers that might influence PR referral decisions. Our findings showed  
27  
28 124 that referral rate was low among all physicians, due to a lack of PR centres and trained staff.  
29  
30 125 Giving the fact that our previous study did not assess non-physicians' health care providers  
31  
32 126 attitudes, beliefs, and barriers to PR even though they are part of the referring process.  
33  
34 127 Therefore, this study aims to explore healthcare professionals' attitudes and expectations  
35  
36 128 toward delivering a PR program and identify factors and barriers that might influence referral  
37  
38 129 of COPD patients in Saudi Arabia.  
39  
40  
41  
42  
43  
44  
45  
46

## 131 **2. Methods**

### 132 *2.1. Study design*

133 A cross-sectional survey was conducted through an online platform (Survey Monkey) between  
134 September 15, 2021, and January 19, 2022.

### 135 136 *2.2. Questionnaire tool*

1  
2  
3 137 The survey was composed of nine multiple-choice closed questions and free text fields for  
4  
5 138 additional comments; it was structured, formulated, and validated by multidisciplinary experts  
6  
7 139 including nursing, respiratory therapy, physiotherapy, and nutrition in the field of PR based on  
8  
9 140 the currently available literature[5, 7, 13]. Before the initial distribution, content and face  
10  
11 141 validity were assessed after piloting the survey with ten healthcare professionals with a clinical  
12  
13 142 background in COPD management.  
14  
15

16  
17 143 Before participants started to answer the questionnaire, the aim of the study was provided,  
18  
19 144 together with information about the lead investigator. Additionally, no personal information  
20  
21 145 was recorded; voluntary participation was ensured by asking if participants were happy to  
22  
23 146 complete the survey or not. An additional statement was provided in the survey: “By answering  
24  
25 147 ‘yes’ in completing the survey question, you voluntarily agree to participate in this study and  
26  
27 148 give your consent to use your anonymous data for research purposes.” The time required to  
28  
29 149 complete the survey was approximately three to five minutes. The questionnaire consisted of  
30  
31 150 two pages of structured responses that involved multiple-choice answers in three sections.  
32  
33 151 Section 1 requested the respondents' demographic information, including gender, profession,  
34  
35 152 years of experience and responsibilities in the management of COPD. Section 2 consisted of  
36  
37 153 three questions asking about healthcare providers' perceptions of PR. The first question had  
38  
39 154 six statements regarding the effectiveness of PR with COPD patients and used a 5-point Likert  
40  
41 155 scale ranging from 1 = strongly disagree to 5 = strongly agree. The second question asked about  
42  
43 156 additional components of PR aside from the exercise component, and the third question was  
44  
45 157 about the best way to deliver PR for COPD patients. Section 3 included two questions regarding  
46  
47 158 patient-related factors that influence referral decisions and process-related factors that  
48  
49 159 influence the decision not to refer COPD patients. These questions used influence as a grading  
50  
51 160 tool: no influence, some influence and strong influence. (See Appendix 1)  
52  
53  
54  
55  
56  
57  
58  
59  
60

### 162 2.3. *Study population and sampling strategy*

163 Convenience sampling techniques were used to recruit the study participants. nurses,  
164 respiratory therapists, physiotherapists, psychologists, occupational therapists, and nutritionists  
165 involved in managing COPD patients or having potential contact with this population were the  
166 main targets. Professional committees managing respiratory diseases such as Saudi Society of  
167 Respiratory Care, Saudi Physical Therapy Association and Saudi Nurses Association, and  
168 social networks (Twitter, WhatsApp, and Telegram) were used to distribute the survey to reach  
169 a greater number of HCPs working in Saudi Arabia.

### 171 2.4. *Patient and Public Involvement statement*

172 Patients were not involved.

### 174 2.5. *Sample size*

175 Sample size calculation was not required, as this was an exploratory study designed.

### 177 2.6. *Ethical approval*

178 Institutional Review Board approval for the study was obtained from Jazan University,  
179 reference number (HAPO-10-Z-001).

### 181 2.7. *Statistical analysis*

182 Data were collected and analysed using the Statistical Package for Social Sciences (SPSS  
183 software, Version 25). The categorical variables were reported and presented in percentages  
184 and frequencies. A Chi-square ( $\chi^2$ ) test was used to assess the statistically significant difference  
185 between categorical variables. Statistical significance was considered if the  $p < 0.05$ .



### 3. Results

Overall, 980 HCPs (53.1% male) participated in the online survey between September 9, 2021, and January 19, 2022. Nurses accounted for 40.1% of the participants, followed by respiratory therapists (32.1%), physiotherapists (16.5%) and other healthcare specialties (11.2%) such as nutritionists and occupational therapists. The majority of respondents had one to two (30%) or three to four (26%) years of clinical experience in caring for COPD patients, while 15.2% had five to six years. Oxygen therapy (57%), inpatient treatment (47.1%), ongoing management (42.1%), diagnosis (38.9%), and outpatient clinics (38.1%) were the main responsibilities for managing COPD patients (Table 1).

**Table 1:** Demographic data and characteristics of all study respondents (n= 980).

| Demographic variables                        | Frequency (%) |
|----------------------------------------------|---------------|
| Gender                                       |               |
| Male                                         | 520 (53.1%)   |
| Female                                       | 460 (46.9%)   |
| Profession                                   |               |
| Nursing                                      | 393 (40.1%)   |
| Respiratory therapy                          | 315 (32.1%)   |
| Physiotherapy                                | 162 (16.5%)   |
| Others                                       | 110 (11.2%)   |
| Year of experience with COPD patients        |               |
| < 1 year                                     | 96 (9.8%)     |
| 1-2 years                                    | 294 (30%)     |
| 3-4 years                                    | 255 (26%)     |
| 5-6 years                                    | 149 (15.2%)   |
| 7-8 years                                    | 75 (7.7%)     |
| 9-10 years                                   | 47 (6.5%)     |
| >10 years                                    | 47 (4.8%)     |
| Responsibilities for care with COPD patients |               |
| Diagnosis                                    | 381 (38.9%)   |
| Urgent assessments                           | 350 (35.7%)   |
| Non-urgent care                              | 360 (36.7%)   |
| Ongoing management                           | 413 (42.1%)   |
| Admission prevention                         | 227 (23.2%)   |
| Medication check                             | 360 (36.7%)   |
| Prescribing                                  | 106 (10.8%)   |
| Oxygen therapy                               | 559 (57%)     |
| In patient treatment                         | 462 (47.1%)   |
| Outpatient clinics                           | 373 (38.1%)   |
| Primary care                                 | 282 (28.8%)   |

Data are presented as frequencies and percentages.

### 3.1. HCPs' opinions on referring COPD patients

Most HCPs strongly agreed that PR would improve COPD patients' exercise capacity (589, or 60.1%), and they strongly believed that PR would reduce symptoms of dyspnoea and fatigue (545, or 55.6%). In addition, most HCPs strongly agreed that PR would reduce levels of anxiety and depression (479, or 48.9%), and 571 (58.3%) strongly agreed that PR would improve patients' health-related quality of life. Moreover, 517 (52.8%) strongly agreed that PR would reduce hospital readmission, and 528 (53.9%) strongly agreed that PR would reduce the risk of future COPD exacerbation. Moreover, 440 HCPs (44.9%) strongly agreed that PR would improve patients' nutritional status, and the majority strongly agreed that PR would improve disease self-management in COPD patients (589, or 60.1%) (Table 2).

### 3.2. Mode of delivery and components of PR

When asked about the preferred way to deliver a PR program for COPD patients, most HCPs believed that in-hospital supervised PR was the preferred method (748, or 76.3%), followed by delivering the PR at home (557, or 56.8%). However, only 275 (28.1%) believed that tailored PR with healthcare provider support over the phone would be the preferred method. Most HCPs believed that the essential components of PR include information about COPD disease (832, or 84.9%), followed by smoking cessation (787, or 80.3%) and COPD symptoms management (749, or 76.4%), aside from the exercise component (Table 3).

**Table 2:** Healthcare providers' perception on referring COPD patients to PR (n=980).

| Item                                                         | Frequency (%) |
|--------------------------------------------------------------|---------------|
| <b>Perception on referring COPD patients to PR</b>           |               |
| <i>I believe PR will improve patients' exercise capacity</i> |               |
| Strongly agree                                               | 589 (60.1%)   |
| Agree                                                        | 260 (26.5%)   |
| Neutral                                                      | 32 (3.3%)     |
| Disagree                                                     | 8 (0.8%)      |
| Strongly disagree                                            | 91 (9.3%)     |
| <i>I believe PR would reduce dyspnoea and fatigue</i>        |               |
| Strongly agree                                               | 545 (55.6%)   |

|    |                                                                           |             |
|----|---------------------------------------------------------------------------|-------------|
| 3  | Agree                                                                     | 297 (30.3%) |
| 4  | Neutral                                                                   | 62 (6.3%)   |
| 5  | Disagree                                                                  | 25 (2.6%)   |
| 6  | Strongly disagree                                                         | 51 (5.2%)   |
| 7  | <i>I believe PR will improve patients' anxiety and depression</i>         |             |
| 8  | Strongly agree                                                            | 479 (48.9%) |
| 9  | Agree                                                                     | 320 (32.7%) |
| 10 | Neutral                                                                   | 105 (10.7%) |
| 11 | Disagree                                                                  | 29 (3%)     |
| 12 | Strongly disagree                                                         | 47 (4.8%)   |
| 13 | <i>I believe PR will improve patients' health-related quality of life</i> |             |
| 14 | Strongly agree                                                            | 571 (58.3%) |
| 15 | Agree                                                                     | 283 (28.9%) |
| 16 | Neutral                                                                   | 57 (5.8%)   |
| 17 | Disagree                                                                  | 19 (1.9%)   |
| 18 | Strongly disagree                                                         | 50 (5.1%)   |
| 19 | <i>I believe PR will reduce the risk hospital readmission</i>             |             |
| 20 | Strongly agree                                                            | 517 (52.8%) |
| 21 | Agree                                                                     | 317 (32.3%) |
| 22 | Neutral                                                                   | 70 (7.1%)   |
| 23 | Disagree                                                                  | 28 (2.9%)   |
| 24 | Strongly disagree                                                         | 48 (4.9%)   |
| 25 | <i>I believe PR will reduce the risk of future COPD exacerbation</i>      |             |
| 26 | Strongly agree                                                            | 528 (53.9%) |
| 27 | Agree                                                                     | 305 (31.1%) |
| 28 | Neutral                                                                   | 78 (8%)     |
| 29 | Disagree                                                                  | 18 (1.8%)   |
| 30 | Strongly disagree                                                         | 51 (5.2%)   |
| 31 | <i>I believe PR will improve patients' nutritional status</i>             |             |
| 32 | Strongly agree                                                            | 440 (44.9%) |
| 33 | Agree                                                                     | 341 (34.8%) |
| 34 | Neutral                                                                   | 117 (11.9%) |
| 35 | Disagree                                                                  | 28 (2.9%)   |
| 36 | Strongly disagree                                                         | 54 (5.5%)   |
| 37 | <i>I believe PR will improve patients' disease self-management</i>        |             |
| 38 | Strongly agree                                                            | 589 (60.1%) |
| 39 | Agree                                                                     | 260 (26.5%) |
| 40 | Neutral                                                                   | 32 (3.3%)   |
| 41 | Disagree                                                                  | 8 (0.8%)    |
| 42 | Strongly disagree                                                         | 91 (9.3%)   |

220 Data are presented as frequencies and percentages.

221

222 **Table 3:** Mode of delivery and component of PR (n=980).

| Item                                                            | Frequency (%) |
|-----------------------------------------------------------------|---------------|
| <b>The best way to deliver PR program for COPD patients</b>     |               |
| In hospital supervised program                                  | 374 (38.16%)  |
| At home                                                         | 276 (28.16%)  |
| Online program with healthcare provider support                 | 192 (19.59%)  |
| Tailored program with healthcare provider support through phone | 138 (14.08%)  |

| <b>Component of PR program aside from exercise component</b> |             |
|--------------------------------------------------------------|-------------|
| Information about COPD disease                               | 832 (84.9%) |
| Smoking cessation                                            | 787 (80.3%) |
| Symptoms management                                          | 749 (76.4%) |
| Psychological support                                        | 671 (68.5%) |
| Information about medications                                | 648 (66.1%) |
| Nutritional counselling                                      | 526 (53.7%) |

223 Data are presented as frequencies and percentages.

### 225 3.3. *Patient-related factors that influence referral decisions to PR*

226 The main factors that strongly influenced the decision to refer COPD patients to PR from the  
 227 HCPs' perspective included mobility affected by patients' breathlessness (64.10%), followed  
 228 by low activity levels (61.60%), low exercise tolerance (58.20%), patient fatigue related to  
 229 COPD (52.90%), and patient anxiety related to COPD (50.70%) (Figure 1).

### 231 3.4. *PR referral barriers*

232 From the HCPs' perspective, the main barriers that strongly affect the referral process for  
 233 COPD patients included a lack of available PR centres (61.80%), followed by a lack of trained  
 234 HCPs who could manage COPD patients (52.70%) and the lack of authority to refer a patient  
 235 (44.30%). In addition, 43% reported that patients might refuse the referral process (Figure 2).

## 237 4. Discussion

238 To the best of our knowledge, this is the first national study that explores assess non physician  
 239 HCPs attitudes and expectation toward delivering PR to COPD patients and identify factors  
 240 and barriers that might influence referral in Saudi Arabia. Findings show that HCPs perceived  
 241 PR as an effective management strategy in improving clinical outcomes in COPD. While a  
 242 supervised hospital-based program was seen as the preferred mode of delivery, the lack of PR  
 243 centres, well-trained staff, and the authority to refer posed significant barriers to PR referrals.

1  
2  
3 244 HCPs perceived patients' education about COPD disease, smoking cessation and symptoms  
4  
5 245 management as the most essential components of PR program next to exercise component.  
6  
7  
8 246 PR has established a solid position as the cornerstone of the management of patients with  
9  
10 247 COPD. Indeed, current evidence shows that PR alleviates exercise limitations and dyspnoea,  
11  
12 248 improves nutritional status and psychological well-being, and reduces hospitalizations, future  
13  
14 249 COPD exacerbations, and mortality rates[5, 14, 15]. In our study, HCPs perceived mobility  
15  
16 250 affected by breathlessness, low activity levels, and low exercise tolerance as the most common  
17  
18 251 factors that influence referral decision which are in accordance with current international  
19  
20 252 guidelines [16, 17]. According to National Institute for Health and Care Excellence (NICE)  
21  
22 253 and British Thoracic Society (BTS) PR should be offer to patients who are dyspeptic and  
23  
24 254 functionally limited due to breathlessness [16, 17]. All these reported factors that influence  
25  
26 255 referral have been showed to effectively improved in COPD patients who were enrolled in  
27  
28 256 PR[18].  
29  
30  
31  
32  
33 257 Despite the current evidence of PR effectiveness, the global referral rate is currently  
34  
35 258 suboptimal[19-21]. Current international COPD guidelines recommend the involvement of  
36  
37 259 HCPs in the referral of COPD patients; however, referral to PR cannot be performed without  
38  
39 260 physicians' permission in Saudi Arabia[16, 18, 20, 22, 23]. In the current study, nearly half of  
40  
41 261 the participants believed that a lack of authority to refer posed a significant barrier to PR  
42  
43 262 referral. Empowering HCPs who are part of the PR team and COPD management to refer  
44  
45 263 patients in need of PR treatment may increase the referral rate and thus improve clinical  
46  
47 264 outcomes.  
48  
49  
50  
51 265 Reasons for not referring patients with COPD to PR programs are likely to be multifactorial;  
52  
53 266 lack of available PR centres is at top of the list, as shown in this study which is in accordance  
54  
55 267 with recent study included physicians and concluded that limited PR centres was the cause of  
56  
57 268 low PR referral[21]. Saudi Arabia has a limited number of PR centres, and the number of people  
58  
59  
60

1  
2  
3 269 who can access these centres is extremely low[9]. This contrasts, for instance, with the situation  
4  
5 270 in the UK, which has 228 PR services. The gap in the current practice is therefore clear, and  
6  
7  
8 271 the establishment of new PR programs needs to be facilitated across the country. It is however  
9  
10 272 important to mention that PR programs can be offered within the existing infrastructure using  
11  
12 273 the incumbent HCPs in the hospitals[24]. It has been previously demonstrated that an outpatient  
13  
14 274 PR program offered at a small hospital is as effective as a program offered in a large  
15  
16  
17 275 hospital[25]. Current evidence also suggests that PR can be effectively offered using different  
18  
19 276 modalities, including inpatient, community-based, home settings or online[25, 26]. Thus, any  
20  
21 277 of these modes of delivery can be adopted according to the hospital's available resources.

22  
23  
24 278 Participants in this study also perceived the lack of well-trained staff as a major barrier to PR  
25  
26 279 referral, in concordance with the current literature[18, 20, 21]. Studies show that Saudi Arabia  
27  
28 280 suffers from a severe shortage of healthcare professionals and that only limited specialties  
29  
30 281 participate in the management of COPD[27, 28]. Evidence suggests that COPD management  
31  
32 282 is much better if performed by a multidisciplinary team[28, 29], highlighting the need for an  
33  
34  
35 283 integrated approach. It is however important to mention that the number of specialized  
36  
37 284 physicians and healthcare professionals (e.g., respiratory nurses and respiratory  
38  
39 285 physiotherapists) is, overall, low[27, 28], which could affect the quality of COPD care in the  
40  
41 286 country. Therefore, the healthcare authority in Saudi Arabia should take action to reduce the  
42  
43  
44 287 current shortage by providing training incentives to people willing to specialize in respiratory  
45  
46  
47 288 medicine and encouraging the upskilling of current healthcare workers. In addition, offering  
48  
49 289 high-quality education either inside or outside the country could be a useful approach to  
50  
51 290 stimulate this change.

52  
53  
54 291 Almost half of the study participants perceived "patients might refuse the referral" as a major  
55  
56 292 barrier to refer COPD patients to PR which is in accordance with recent study included  
57  
58 293 physicians and concluded that 46% perceived patients refuse referral is a major barrier[21].  
59  
60

1  
2  
3 294 This may be due to the lack of patients' knowledge about the PR and its benefit to their  
4  
5 295 condition as well as travel distance to PR[18, 30, 31]. Therefore, incorporating patients'  
6  
7 296 preferences of PR delivery mode and increasing awareness of PR and its benefit among COPD  
8  
9 297 population are needed.

10  
11  
12 298 Almost 80% of HCPs in this study considered supervised hospital-based programs the  
13  
14 299 preferred mode of PR delivery, despite the limited number of PR centres in the country. This  
15  
16 300 is likely because of a lack of knowledge about PR services in Saudi Arabia, as only a small  
17  
18 301 proportion of HCPs know what PR is[10]. However, utilizing the available resources within  
19  
20 302 the infrastructure of the hospital remains possible for setting up and delivering a PR program.  
21  
22 303 Alternatively, home settings, which are as effective as conventional PR programs in improving  
23  
24 304 exercise capacity and respiratory symptoms[32], could be considered a viable option.

25  
26 305 In this study, most HCPs believed that information about COPD disease, smoking cessation  
27  
28 306 and symptoms management are the most important components of a PR program. Indeed,  
29  
30 307 disease-related education contributes to patients' recognition of their symptoms and worsening  
31  
32 308 disease[33]. However, the content of the PR educational program, who delivers it, and how it  
33  
34 309 is delivered remain unclear. According to the ATS/ERS official consensus, smoking cessation  
35  
36 310 is a major component of a PR program[7, 13]. It is the primary cause of COPD, with the  
37  
38 311 prevalence of COPD smokers ranging from 38% to 77%[34]. In addition, smoking contributes  
39  
40 312 to 73% of COPD-related deaths worldwide[35]. Smoking is also associated with accelerated  
41  
42 313 lung function declines, higher COPD exacerbations[36, 37], and increased dropout rates from  
43  
44 314 PR. Therefore, support for smoking cessation should be offered throughout the PR program.  
45  
46 315 Further research is needed to address COPD patients' attitudes and expectations toward  
47  
48 316 delivering a PR program and identify factors and barriers of referring. Additionally, future  
49  
50 317 research should also focus on suitable mode of delivering PR as well as essential components  
51  
52 318 from patients' perspective.  
53  
54  
55  
56  
57  
58  
59  
60



319

320

#### 4.1. *Strengths and limitations*

Convenience sample techniques were used in the study, which may impose a selection bias.

In this study, we did not survey or interview physicians who are part of COPD management.

Finally, the study was conducted during the COVID-19 pandemic, which may have impacted respondents' opinions.

326

### 5. Conclusion

HCPs across specialties agreed on the effectiveness of PR. A supervised hospital-based program was the preferred mode of PR delivery although limited PR services existed. Lack of PR centres, well-trained staff, and the authority to refer were major barriers to referring COPD patients. Patients' education, smoking cessation and symptoms management were perceived as essential components of the PR program, in addition to the exercise component.

333

#### Contributors

The study was designed by A.A., M.A., and J.S.A. Data collection was performed by A.A.A, I.A.A, H.W, and A.S.A, statistical methodology was performed by A.A, and formal analysis was performed by A.H, Y.S.A and S.M.A. The draft of the manuscript was written by A.M.A, A.A.A, I.A.A, R.A.S, E.M.A and M.A, and reviewed and revised by E.M.A, J.S.A., H.W and S.M.A. All authors approved the paper for publication.

340

**Funding:** This research received no specific grant from any funding agency in the public, commercial or not-for-profit sectors

**Competing interests:** None declared.

**Patient consent for publication:** Not required



1  
2  
3 345 **Ethics approval:** Institutional Review Board approval for the study was obtained from Jazan  
4  
5 346 University, reference number (HAPO-10-Z-001).  
6

7  
8 347 **Provenance and peer review:** Not commissioned; externally peer reviewed.  
9

10 348 **Data availability statement:** Data are available on reasonable request.  
11  
12  
13 349

14  
15  
16  
17  
18  
19  
20  
21  
22  
23  
24  
25  
26  
27  
28  
29  
30  
31  
32  
33  
34  
35  
36  
37  
38  
39  
40  
41  
42  
43  
44  
45  
46  
47  
48  
49  
50  
51  
52  
53  
54  
55  
56  
57  
58  
59  
60

For peer review only

## References

1. Halpin, D.M.G., et al., *Global Initiative for the Diagnosis, Management, and Prevention of Chronic Obstructive Lung Disease. The 2020 GOLD Science Committee Report on COVID-19 and Chronic Obstructive Pulmonary Disease*. Am J Respir Crit Care Med, 2021. **203**(1): p. 24-36.
2. Alqahtani, J.S., et al., *Risk factors for all-cause hospital readmission following exacerbation of COPD: a systematic review and meta-analysis*. Eur Respir Rev, 2020. **29**(156).
3. von Trott, P., S.L. Oei, and C. Ramsenthaler, *Acupuncture for Breathlessness in Advanced Diseases: A Systematic Review and Meta-analysis*. J Pain Symptom Manage, 2020. **59**(2): p. 327-338 e3.
4. Evans, R.A. and S.J. Singh, *Minimum important difference of the incremental shuttle walk test distance in patients with COPD*. Thorax, 2019. **74**(10): p. 994-995.
5. Spruit, M.A., et al., *An official American Thoracic Society/European Respiratory Society statement: key concepts and advances in pulmonary rehabilitation*. Am J Respir Crit Care Med, 2013. **188**(8): p. e13-64.
6. Sahin, H., et al., *Is a pulmonary rehabilitation program effective in COPD patients with chronic hypercapnic failure?* Expert Rev Respir Med, 2016. **10**(5): p. 593-8.
7. Holland, A.E., et al., *Defining Modern Pulmonary Rehabilitation. An Official American Thoracic Society Workshop Report*. Annals of the American Thoracic Society, 2021. **18**(5): p. e12-e29.
8. Alqahtani, J.S., *Prevalence, incidence, morbidity and mortality rates of COPD in Saudi Arabia: Trends in burden of COPD from 1990 to 2019*. PLOS ONE, 2022. **17**(5): p. e0268772.
9. Aldhahir, A.M., et al., *Pulmonary rehabilitation for COPD: A narrative review and call for further implementation in Saudi Arabia*. Ann Thorac Med, 2021. **16**(4): p. 299-305.
10. Alsubaiei, M.E., et al., *Barriers for setting up a pulmonary rehabilitation program in the Eastern Province of Saudi Arabia*. Ann Thorac Med, 2016. **11**(2): p. 121-7.
11. Khan, J.H., et al., *The Saudi Guidelines for the Diagnosis and Management of COPD*. Ann Thorac Med, 2014. **9**(2): p. 55-76.
12. Celli, B.R., et al., *An Official American Thoracic Society/European Respiratory Society Statement: Research questions in chronic obstructive pulmonary disease*. Am J Respir Crit Care Med, 2015. **191**(7): p. e4-e27.
13. Hill, K., I. Vogiatzis, and C. Burtin, *The importance of components of pulmonary rehabilitation, other than exercise training, in COPD*. European Respiratory Review, 2013. **22**(129): p. 405.
14. Vogelmeier, C.F., et al., *Global strategy for the diagnosis, management, and prevention of chronic obstructive lung disease 2017 report*. American Journal of Respiratory and Critical Care Medicine, 2017. **195**(5): p. 557-582.
15. Aldhahir, A.M., et al., *Nutritional supplementation during pulmonary rehabilitation in COPD: A systematic review*. Chron Respir Dis, 2020. **17**: p. 1479973120904953.
16. Bolton, C.E., et al., *British Thoracic Society guideline on pulmonary rehabilitation in adults: accredited by NICE*. Thorax, 2013. **68**(Suppl 2): p. ii1.

17. *National Institute for Health and Care Excellence: Guidelines, in Chronic obstructive pulmonary disease in over 16s: diagnosis and management.* 2019, National Institute for Health and Care Excellence (NICE)  
Copyright © NICE 2018.: London.
18. Rochester, C.L., et al., *An Official American Thoracic Society/European Respiratory Society Policy Statement: Enhancing Implementation, Use, and Delivery of Pulmonary Rehabilitation.* American Journal of Respiratory and Critical Care Medicine, 2015. **192**(11): p. 1373-1386.
19. Milner, S.C., et al., *Rate of, and barriers and enablers to, pulmonary rehabilitation referral in COPD: A systematic scoping review.* Respir Med, 2018. **137**: p. 103-114.
20. Johnston, K.N., et al., *Barriers to, and facilitators for, referral to pulmonary rehabilitation in COPD patients from the perspective of Australian general practitioners: a qualitative study.* Primary Care Respiratory Journal, 2013. **22**(3): p. 319-324.
21. Aldahir, A.M., et al., *Physicians' Attitudes, Beliefs and Barriers to a Pulmonary Rehabilitation for COPD Patients in Saudi Arabia: A Cross-Sectional Study.* Healthcare, 2022. **10**(5).
22. Hogg, L., et al., *Effectiveness, Attendance, and Completion of an Integrated, System-Wide Pulmonary Rehabilitation Service for COPD: Prospective Observational Study.* COPD: Journal of Chronic Obstructive Pulmonary Disease, 2012. **9**(5): p. 546-554.
23. Khan, J.H., et al., *The Saudi Guidelines for the Diagnosis and Management of COPD.* Annals of thoracic medicine, 2014. **9**(2): p. 55-76.
24. Jenkins, S., K. Hill, and N.M. Cecins, *State of the art: how to set up a pulmonary rehabilitation program.* Respirology, 2010. **15**(8): p. 1157-73.
25. Ward, J.A., et al., *Feasibility and effectiveness of a pulmonary rehabilitation programme in a community hospital setting.* Br J Gen Pract, 2002. **52**(480): p. 539-42.
26. Maltais, F., et al., *Effects of home-based pulmonary rehabilitation in patients with chronic obstructive pulmonary disease: a randomized trial.* Ann Intern Med, 2008. **149**(12): p. 869-78.
27. Aboshaiqah, A., *Strategies to address the nursing shortage in Saudi Arabia.* International Nursing Review, 2016. **63**(3): p. 499-506.
28. Alsubaiei, M., et al., *Factors influencing management of chronic respiratory diseases in general and chronic obstructive pulmonary disease in particular in Saudi Arabia: An overview.* Annals of Thoracic Medicine, 2018. **13**(3): p. 144-149.
29. Kuzma, A.M., et al., *Multidisciplinary care of the patient with chronic obstructive pulmonary disease.* Proceedings of the American Thoracic Society, 2008. **5**(4): p. 567-571.
30. Cox, N.S., et al., *Pulmonary rehabilitation referral and participation are commonly influenced by environment, knowledge, and beliefs about consequences: a systematic review using the Theoretical Domains Framework.* Journal of Physiotherapy, 2017. **63**(2): p. 84-93.
31. Lahham, A. and A.E. Holland, *The Need for Expanding Pulmonary Rehabilitation Services.* Life (Basel, Switzerland), 2021. **11**(11): p. 1236.
32. McCarthy, B., et al., *Pulmonary rehabilitation for chronic obstructive pulmonary disease.* Cochrane Database Syst Rev, 2015(2): p. Cd003793.

- 1  
2  
3  
4  
5  
6  
7  
8  
9  
10  
11  
12  
13  
14  
15  
16  
17  
18  
19
33. Crisafulli, E., et al., *Learning impact of education during pulmonary rehabilitation program. An observational short-term cohort study.* Monaldi Arch Chest Dis, 2010. **73**(2): p. 64-71.
  34. Tønnesen, P., *Smoking cessation and COPD.* European Respiratory Review, 2013. **22**(127): p. 37.
  35. MacNee, W., *Chronic obstructive pulmonary disease.* 5 ed. 2010: Oxford University Press. 3311-3344.
  36. Badaran, E., et al., *Smoking and COPD exacerbations.* European Respiratory Journal, 2012. **40**(Suppl 56): p. P1055.
  37. Brown, A.T., et al., *Determinants of successful completion of pulmonary rehabilitation in COPD.* International journal of chronic obstructive pulmonary disease, 2016. **11**: p. 391-397.

20  
21  
22

### Figure legend:

23  
24  
25

**Figure 1:** Patient-related factors that influence referral decision to PR, using strong, some or no influence grading.

26  
27  
28  
29

**Figure 2:** Barriers to referring COPD patients to PR from HCPs perspective, using strong, some or no influence grading.

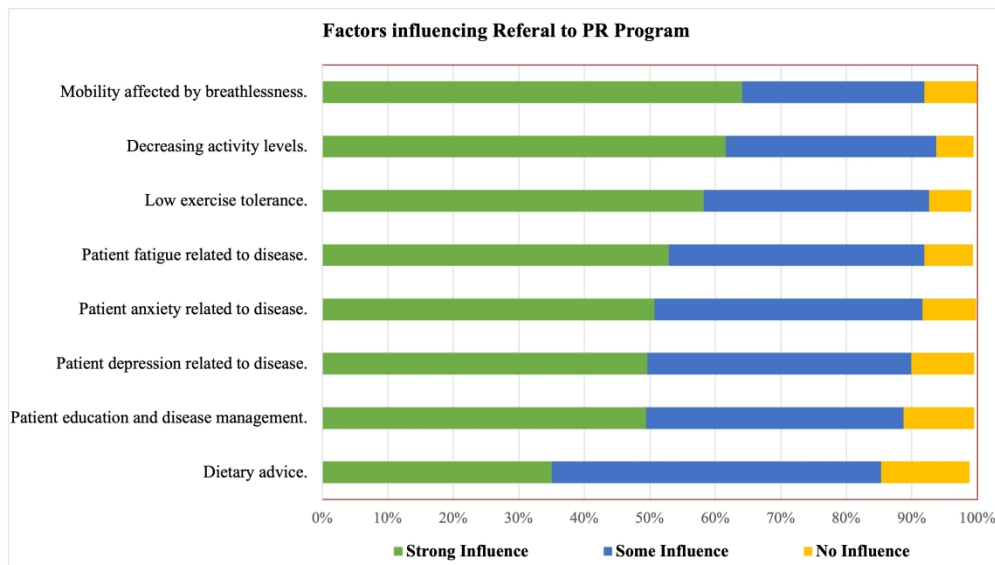

Patient-related factors that influence referral decision to PR, using strong, some or no influence grading.

247x139mm (330 x 330 DPI)

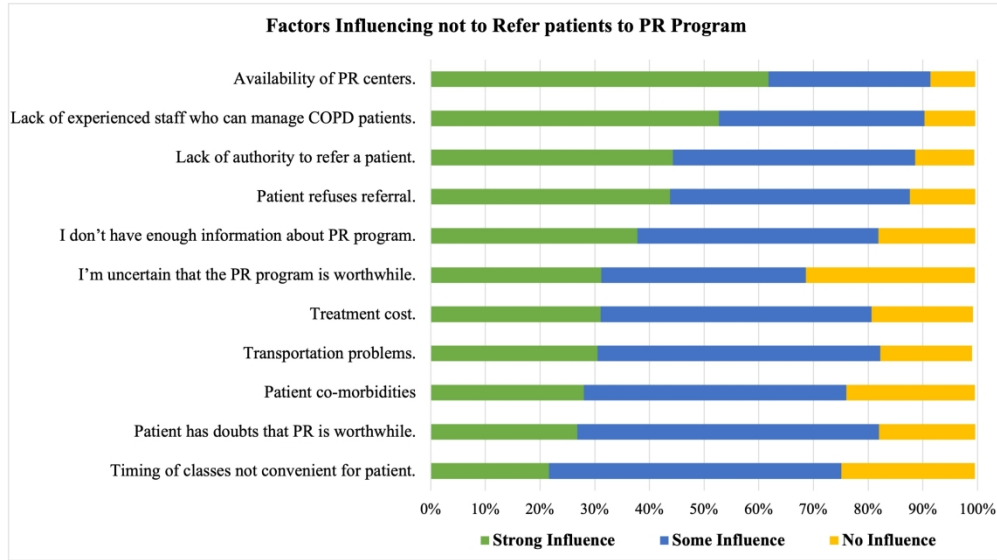

Barriers to referring COPD patients to PR from HCPs perspective, using strong, some or no influence grading.

247x138mm (330 x 330 DPI)

## Staff Attitudes and Expectations regarding a pulmonary rehabilitation for Chronic obstructive pulmonary disease patients.

We are aiming to understand your attitude and expectations toward delivering a Pulmonary rehabilitation programme for patients with Chronic obstructive pulmonary disease (COPD), and it would be great if you could answer this questionnaire.

Please fill out the survey, be informed that your identity will be completely anonymous and no personal identifying information will be collected and there are no consequences for refusing to participate, your participation is voluntary. This survey will only take 5 minutes to complete.

By answering the first question, you voluntarily agree to participate in this study and give your consent to use your anonymous data for research purposes.

### I. Demographic Information

1. Your Gender?

- A. Male
- B. Female

2. Your Profession?

- A. Nurse
- B. Respiratory therapist
- C. Physiotherapist
- D. Other:

3. What responsibilities do you have for the care of people with COPD? Tick all that apply.

- |                                             |                                               |                                                     |
|---------------------------------------------|-----------------------------------------------|-----------------------------------------------------|
| <input type="checkbox"/> Diagnosis          | <input type="checkbox"/> Prescribing          | <input type="checkbox"/> Inpatient treatment        |
| <input type="checkbox"/> Non-urgent care    | <input type="checkbox"/> Ongoing management   | <input type="checkbox"/> Outpatient clinics         |
| <input type="checkbox"/> Urgent assessments | <input type="checkbox"/> Admission prevention | <input type="checkbox"/> Primary care               |
| <input type="checkbox"/> Oxygen therapy     | <input type="checkbox"/> Medication checks    | <input type="checkbox"/> Other: please give details |

4. How many years of experience do you have of caring for people with COPD?

Please enter a whole number.

## II. Perceptions of a rehabilitation programme

5. For each statement please select the answer that best suits your opinion.

|                                                                                                      | Strongly disagree        | Disagree                 | Neutral                  | Agree                    | Strongly agree           |
|------------------------------------------------------------------------------------------------------|--------------------------|--------------------------|--------------------------|--------------------------|--------------------------|
| I believe that pulmonary rehabilitation programme will improve patients exercise capacity.           | <input type="checkbox"/> |
| I believe that pulmonary rehabilitation programme would be beneficial in reducing dyspnea & fatigue. | <input type="checkbox"/> |
| I believe that pulmonary rehabilitation programme will improve patient anxiety and depression        | <input type="checkbox"/> |
| I believe that pulmonary rehabilitation programme will improve health-related quality of life.       | <input type="checkbox"/> |
| I believe that pulmonary rehabilitation programme would help in reducing hospital readmission        | <input type="checkbox"/> |
| I think that pulmonary rehabilitation will reduces the risk of COPD exacerbation                     | <input type="checkbox"/> |
| I believe that pulmonary rehabilitation programme will improve patient nutritional status            | <input type="checkbox"/> |
| I believe that pulmonary rehabilitation programme will improve patient disease self-management       | <input type="checkbox"/> |

6. What do you think that pulmonary rehabilitation programme for individuals with COPD should contain aside from an exercise programme? Tick all that apply.

- |                                                         |                                                      |
|---------------------------------------------------------|------------------------------------------------------|
| <input type="checkbox"/> Information about COPD disease | <input type="checkbox"/> Symptoms management         |
| <input type="checkbox"/> Nutritional counseling         | <input type="checkbox"/> Smoking cessation           |
| <input type="checkbox"/> Psychological support          | <input type="checkbox"/> Others: please give details |
| <input type="checkbox"/> Information about medications  |                                                      |

If other, please give details



7. **What do you think is the best way to deliver a pulmonary rehabilitation programme for this population.**

- At the hospital. Where they can follow a programme supervised by healthcare professionals.
- By using an online programme with support from a healthcare professional to answer their questions.
- At home. Where they can follow a programme manual with the support of healthcare professionals.
- By following a tailored programme with the support of health care professionals through the phone.

**III. Referral to rehabilitation programme**

8. **In your opinion, what factors might influence decision to refer COPD patients to a pulmonary rehabilitation programme?**

|                                          | No influence             | Some influence           | Strong influence         |
|------------------------------------------|--------------------------|--------------------------|--------------------------|
| Mobility, affected by breathlessness     | <input type="checkbox"/> | <input type="checkbox"/> | <input type="checkbox"/> |
| Decreased activity levels                | <input type="checkbox"/> | <input type="checkbox"/> | <input type="checkbox"/> |
| Low exercise tolerance                   | <input type="checkbox"/> | <input type="checkbox"/> | <input type="checkbox"/> |
| Patient anxiety related to disease       | <input type="checkbox"/> | <input type="checkbox"/> | <input type="checkbox"/> |
| Depression related to disease            | <input type="checkbox"/> | <input type="checkbox"/> | <input type="checkbox"/> |
| Patient education and disease management | <input type="checkbox"/> | <input type="checkbox"/> | <input type="checkbox"/> |
| Fatigue related to disease               | <input type="checkbox"/> | <input type="checkbox"/> | <input type="checkbox"/> |
| Dietary advice                           | <input type="checkbox"/> | <input type="checkbox"/> | <input type="checkbox"/> |
| Others please give details               |                          |                          |                          |

9. **In your opinion, what factors might influence decision Not to refer COPD patients to a pulmonary rehabilitation programme ?**

|                                                                                    | No influence             | Some influence           | Strong influence         |
|------------------------------------------------------------------------------------|--------------------------|--------------------------|--------------------------|
| I don't have enough information about pulmonary rehabilitation programme           | <input type="checkbox"/> | <input type="checkbox"/> | <input type="checkbox"/> |
| I'm uncertain that the programme is worthwhile                                     | <input type="checkbox"/> | <input type="checkbox"/> | <input type="checkbox"/> |
| Patient refuses referral                                                           | <input type="checkbox"/> | <input type="checkbox"/> | <input type="checkbox"/> |
| Patient co-morbidities                                                             | <input type="checkbox"/> | <input type="checkbox"/> | <input type="checkbox"/> |
| Patient has doubts that rehabilitation is worthwhile                               | <input type="checkbox"/> | <input type="checkbox"/> | <input type="checkbox"/> |
| Transportation problems                                                            | <input type="checkbox"/> | <input type="checkbox"/> | <input type="checkbox"/> |
| Timing of classes not convenient for patient                                       | <input type="checkbox"/> | <input type="checkbox"/> | <input type="checkbox"/> |
| Lack of authority to refer patients                                                | <input type="checkbox"/> | <input type="checkbox"/> | <input type="checkbox"/> |
| Lack of trained staff who can manage COPD patients during pulmonary rehabilitation | <input type="checkbox"/> | <input type="checkbox"/> | <input type="checkbox"/> |
| Treatment cost                                                                     | <input type="checkbox"/> | <input type="checkbox"/> | <input type="checkbox"/> |
| Availability of pulmonary rehabilitation centers                                   | <input type="checkbox"/> | <input type="checkbox"/> | <input type="checkbox"/> |
| Others please give details                                                         |                          |                          |                          |

1  
2  
3  
4  
5  
6  
7  
8  
9  
10  
11  
12  
13  
14  
15  
16  
17  
18  
19  
20  
21  
22  
23  
24  
25  
26  
27  
28  
29  
30  
31  
32  
33  
34  
35  
36  
37  
38  
39  
40  
41  
42  
43  
44  
45  
46  
47  
48  
49  
50  
51  
52  
53  
54  
55  
56  
57  
58  
59  
60STROBE Statement—Checklist of items that should be included in reports of *cross-sectional studies*

|                              | <b>Item No</b> | <b>Recommendation</b>                                                                                                                                                                             | <b>Page number<br/>Line number</b> |
|------------------------------|----------------|---------------------------------------------------------------------------------------------------------------------------------------------------------------------------------------------------|------------------------------------|
| <b>Title and abstract</b>    | 1              | (a) Indicate the study's design with a commonly used term in the title or the abstract                                                                                                            | P: 1, Line: 3                      |
|                              |                | (b) Provide in the abstract an informative and balanced summary of what was done and what was found                                                                                               | P: 2,<br>Lines:46-73               |
| <b>Introduction</b>          |                |                                                                                                                                                                                                   |                                    |
| Background/rationale         | 2              | Explain the scientific background and rationale for the investigation being reported                                                                                                              | Pages 4 and 5                      |
| Objectives                   | 3              | State specific objectives, including any prespecified hypotheses                                                                                                                                  | Page 5,<br>lines:127-129           |
| <b>Methods</b>               |                |                                                                                                                                                                                                   |                                    |
| Study design                 | 4              | Present key elements of study design early in the paper                                                                                                                                           | Page 5<br>Lines:133-134            |
| Setting                      | 5              | Describe the setting, locations, and relevant dates, including periods of recruitment, exposure, follow-up, and data collection                                                                   | Page 7<br>Lines:163-169            |
| Participants                 | 6              | (a) Give the eligibility criteria, and the sources and methods of selection of participants                                                                                                       | Page 7<br>Lines:163-169            |
| Variables                    | 7              | Clearly define all outcomes, exposures, predictors, potential confounders, and effect modifiers. Give diagnostic criteria, if applicable                                                          | N/A                                |
| Data sources/<br>measurement | 8*             | For each variable of interest, give sources of data and details of methods of assessment (measurement). Describe comparability of assessment methods if there is more than one group              | Page 6<br>Lines:137-160            |
| Bias                         | 9              | Describe any efforts to address potential sources of bias                                                                                                                                         | N/A                                |
| Study size                   | 10             | Explain how the study size was arrived at                                                                                                                                                         | Page 7,<br>Line:175                |
| Quantitative<br>variables    | 11             | Explain how quantitative variables were handled in the analyses. If applicable, describe which groupings were chosen and why                                                                      | N/A                                |
| Statistical methods          | 12             | (a) Describe all statistical methods, including those used to control for confounding                                                                                                             | Page 7<br>Lines:182-185            |
|                              |                | (b) Describe any methods used to examine subgroups and interactions                                                                                                                               | N/A                                |
|                              |                | (c) Explain how missing data were addressed                                                                                                                                                       | N/A                                |
|                              |                | (d) If applicable, describe analytical methods taking account of sampling strategy                                                                                                                | N/A                                |
|                              |                | (e) Describe any sensitivity analyses                                                                                                                                                             | N/A                                |
| <b>Results</b>               |                |                                                                                                                                                                                                   |                                    |
| Participants                 | 13*            | (a) Report numbers of individuals at each stage of study—eg numbers potentially eligible, examined for eligibility, confirmed eligible, included in the study, completing follow-up, and analysed | Page 8<br>Lines:187-188            |
|                              |                | (b) Give reasons for non-participation at each stage                                                                                                                                              | N/A                                |
|                              |                | (c) Consider use of a flow diagram                                                                                                                                                                | N/A                                |
| Descriptive data             | 14*            | (a) Give characteristics of study participants (eg demographic, clinical, social) and information on exposures and potential confounders                                                          | Page 8:<br>Table 1                 |
|                              |                | (b) Indicate number of participants with missing data for each variable of interest                                                                                                               | N/A                                |

|                          |     |                                                                                                                                                                                                              |                              |
|--------------------------|-----|--------------------------------------------------------------------------------------------------------------------------------------------------------------------------------------------------------------|------------------------------|
| Outcome data             | 15* | Report numbers of outcome events or summary measures                                                                                                                                                         | Pages 9-11                   |
| Main results             | 16  | (a) Give unadjusted estimates and, if applicable, confounder-adjusted estimates and their precision (eg, 95% confidence interval). Make clear which confounders were adjusted for and why they were included | N/A                          |
|                          |     | (b) Report category boundaries when continuous variables were categorized                                                                                                                                    | N/A                          |
|                          |     | (c) If relevant, consider translating estimates of relative risk into absolute risk for a meaningful time period                                                                                             | N/A                          |
| Other analyses           | 17  | Report other analyses done—eg analyses of subgroups and interactions, and sensitivity analyses                                                                                                               | N/A                          |
| <b>Discussion</b>        |     |                                                                                                                                                                                                              |                              |
| Key results              | 18  | Summarise key results with reference to study objectives                                                                                                                                                     | Pages 11-12<br>Lines:238-245 |
| Limitations              | 19  | Discuss limitations of the study, taking into account sources of potential bias or imprecision. Discuss both direction and magnitude of any potential bias                                                   | Page:15<br>Lines:318-322     |
| Interpretation           | 20  | Give a cautious overall interpretation of results considering objectives, limitations, multiplicity of analyses, results from similar studies, and other relevant evidence                                   | Pages 11-14<br>Lines:238-315 |
| Generalisability         | 21  | Discuss the generalisability (external validity) of the study results                                                                                                                                        | N/A                          |
| <b>Other information</b> |     |                                                                                                                                                                                                              |                              |
| Funding                  | 22  | Give the source of funding and the role of the funders for the present study and, if applicable, for the original study on which the present article is based                                                | Page 15<br>Line:338          |

\*Give information separately for exposed and unexposed groups.

**Note:** An Explanation and Elaboration article discusses each checklist item and gives methodological background and published examples of transparent reporting. The STROBE checklist is best used in conjunction with this article (freely available on the Web sites of PLoS Medicine at <http://www.plosmedicine.org/>, Annals of Internal Medicine at <http://www.annals.org/>, and Epidemiology at <http://www.epidem.com/>). Information on the STROBE Initiative is available at [www.strobe-statement.org](http://www.strobe-statement.org).

# BMJ Open

## Healthcare Providers' Attitudes, Beliefs and Barriers to Pulmonary Rehabilitation for Chronic Obstructive Pulmonary Disease Patients in Saudi Arabia: A Cross-Sectional Study

|                                 |                                                                                                                                                                                                                                                                                                                                                                                                                                                                                                                                                                                                                                                                                                                                                                                                                                                                                                                                                                                                                                                                                                                                                                                                                                                                                                                                                                                                                                                                                                                                                                                                                                                        |
|---------------------------------|--------------------------------------------------------------------------------------------------------------------------------------------------------------------------------------------------------------------------------------------------------------------------------------------------------------------------------------------------------------------------------------------------------------------------------------------------------------------------------------------------------------------------------------------------------------------------------------------------------------------------------------------------------------------------------------------------------------------------------------------------------------------------------------------------------------------------------------------------------------------------------------------------------------------------------------------------------------------------------------------------------------------------------------------------------------------------------------------------------------------------------------------------------------------------------------------------------------------------------------------------------------------------------------------------------------------------------------------------------------------------------------------------------------------------------------------------------------------------------------------------------------------------------------------------------------------------------------------------------------------------------------------------------|
| Journal:                        | <i>BMJ Open</i>                                                                                                                                                                                                                                                                                                                                                                                                                                                                                                                                                                                                                                                                                                                                                                                                                                                                                                                                                                                                                                                                                                                                                                                                                                                                                                                                                                                                                                                                                                                                                                                                                                        |
| Manuscript ID                   | bmjopen-2022-063900.R2                                                                                                                                                                                                                                                                                                                                                                                                                                                                                                                                                                                                                                                                                                                                                                                                                                                                                                                                                                                                                                                                                                                                                                                                                                                                                                                                                                                                                                                                                                                                                                                                                                 |
| Article Type:                   | Original research                                                                                                                                                                                                                                                                                                                                                                                                                                                                                                                                                                                                                                                                                                                                                                                                                                                                                                                                                                                                                                                                                                                                                                                                                                                                                                                                                                                                                                                                                                                                                                                                                                      |
| Date Submitted by the Author:   | 20-Jul-2022                                                                                                                                                                                                                                                                                                                                                                                                                                                                                                                                                                                                                                                                                                                                                                                                                                                                                                                                                                                                                                                                                                                                                                                                                                                                                                                                                                                                                                                                                                                                                                                                                                            |
| Complete List of Authors:       | <p>Aldhahir, Abdulelah; Jazan University, Faculty of Applied Medical Sciences, Respiratory Therapy Department<br/> Alqahtani , Jaber S. ; Prince Sultan Military College of Health Sciences, Department of Respiratory Care<br/> AlDraiwiesh, Ibrahim; Prince Sultan Military College of Health Sciences, Department of Respiratory Care<br/> Alghamdi, Saeed; Umm Al-Qura University College of Applied Medical Science, Clinical Technology Department, Respiratory Care Program; Imperial College London, National Heart and Lung Institute<br/> Alsulayyim, Abdullah; Imperial College London, National Heart and Lung Institute; Jazan University, Faculty of Applied Medical Sciences<br/> Alqarni, Abdullah; King Abdulaziz University, Department of Respiratory Therapy, Faculty of Medical Rehabilitation Sciences<br/> Alhotye, Munyra; King Saud bin Abdulaziz University for Health Sciences College of Applied Medical Sciences, Department of Respiratory Therapy<br/> Alwafi, Hassan; Umm Al-Qura University College of Medicine, Faculty of Medicine<br/> Siraj, Rayan; King Faisal University, Department of Respiratory Therapy, College of Applied Medical Sciences<br/> Alrajeh, Ahmed; King Faisal University, Department of Respiratory Therapy, College of Applied Medical Sciences<br/> Aldabayan, Yousef; King Faisal University, Department of Respiratory Therapy, College of Applied Medical Sciences<br/> Alzahrani, Eidan ; Prince Sultan Military College of Health Sciences, Department of Physiotherapy<br/> Hakamy, Ali ; Jazan University, Respiratory Therapy Department, Faculty of Applied Medical Sciences</p> |
| <b>Primary Subject Heading</b>: | Rehabilitation medicine                                                                                                                                                                                                                                                                                                                                                                                                                                                                                                                                                                                                                                                                                                                                                                                                                                                                                                                                                                                                                                                                                                                                                                                                                                                                                                                                                                                                                                                                                                                                                                                                                                |
| Secondary Subject Heading:      | Rehabilitation medicine                                                                                                                                                                                                                                                                                                                                                                                                                                                                                                                                                                                                                                                                                                                                                                                                                                                                                                                                                                                                                                                                                                                                                                                                                                                                                                                                                                                                                                                                                                                                                                                                                                |
| Keywords:                       | REHABILITATION MEDICINE, RESPIRATORY MEDICINE (see Thoracic Medicine), Chronic airways disease < THORACIC MEDICINE                                                                                                                                                                                                                                                                                                                                                                                                                                                                                                                                                                                                                                                                                                                                                                                                                                                                                                                                                                                                                                                                                                                                                                                                                                                                                                                                                                                                                                                                                                                                     |
|                                 |                                                                                                                                                                                                                                                                                                                                                                                                                                                                                                                                                                                                                                                                                                                                                                                                                                                                                                                                                                                                                                                                                                                                                                                                                                                                                                                                                                                                                                                                                                                                                                                                                                                        |

1  
2  
3  
4  
5  
6  
7  
8  
9  
10  
11  
12  
13  
14  
15  
16  
17  
18  
19  
20  
21  
22  
23  
24  
25  
26  
27  
28  
29  
30  
31  
32  
33  
34  
35  
36  
37  
38  
39  
40  
41  
42  
43  
44  
45  
46  
47  
48  
49  
50  
51  
52  
53  
54  
55  
56  
57  
58  
59  
60





I, the Submitting Author has the right to grant and does grant on behalf of all authors of the Work (as defined in the below author licence), an exclusive licence and/or a non-exclusive licence for contributions from authors who are: i) UK Crown employees; ii) where BMJ has agreed a CC-BY licence shall apply, and/or iii) in accordance with the terms applicable for US Federal Government officers or employees acting as part of their official duties; on a worldwide, perpetual, irrevocable, royalty-free basis to BMJ Publishing Group Ltd ("BMJ") its licensees and where the relevant Journal is co-owned by BMJ to the co-owners of the Journal, to publish the Work in this journal and any other BMJ products and to exploit all rights, as set out in our [licence](#).

The Submitting Author accepts and understands that any supply made under these terms is made by BMJ to the Submitting Author unless you are acting as an employee on behalf of your employer or a postgraduate student of an affiliated institution which is paying any applicable article publishing charge ("APC") for Open Access articles. Where the Submitting Author wishes to make the Work available on an Open Access basis (and intends to pay the relevant APC), the terms of reuse of such Open Access shall be governed by a Creative Commons licence – details of these licences and which [Creative Commons](#) licence will apply to this Work are set out in our licence referred to above.

Other than as permitted in any relevant BMJ Author's Self Archiving Policies, I confirm this Work has not been accepted for publication elsewhere, is not being considered for publication elsewhere and does not duplicate material already published. I confirm all authors consent to publication of this Work and authorise the granting of this licence.

1  
2  
3 **1 Healthcare Providers' Attitudes, Beliefs and Barriers to Pulmonary**  
4  
5  
6 **2 Rehabilitation for Chronic Obstructive Pulmonary Disease Patients in Saudi**  
7  
8  
9 **3 Arabia: A Cross-Sectional Study**  
10  
11  
12 **4**

13 5 Abdulelah M. Aldhahir <sup>1</sup>

14 6 Jaber S. Alqahtani<sup>2</sup>

15 7 Ibrahim A. AlDraiwiesh<sup>2</sup>

16 8 Saeed M. Alghamdi<sup>3,4</sup>

17 9 Abdullah S. Alsulayyim<sup>1,4</sup>

18 10 Abdullah A. Alqarni <sup>5</sup>

19 11 Munyra Alhotye<sup>6</sup>

20 12 Hassan Alwafi<sup>7</sup>

21 13 Rayan A. Siraj<sup>8</sup>

22 14 Ahmed M. Alrajeh<sup>8</sup>

23 15 Yousef S. Aldabayan<sup>8</sup>

24 16 Edan M. Alzahrani<sup>9</sup>

25 17 Ali Hakamy<sup>1</sup>

26 18  
27 19  
28 20 <sup>1</sup>Respiratory Therapy Department, Faculty of Applied Medical Sciences, Jazan University, Jazan, Saudi  
29 21 Arabia; <sup>2</sup>Department of Respiratory Care, Prince Sultan Military College of Health Sciences, Dammam,  
30 22 Saudi Arabia; <sup>3</sup>Clinical Technology Department, Respiratory Care Program, Faculty of Applied Medical  
31 23 Sciences, Umm Al-Qura University, Makkah, Saudi Arabia; <sup>4</sup>National Heart and Lung Institute, Imperial  
32 24 College London, UK; <sup>5</sup>Department of Respiratory Therapy, Faculty of Medical Rehabilitation Sciences,  
33 25 King Abdulaziz University, Jeddah, Saudi Arabia; <sup>6</sup>Department of Respiratory Therapy, King Saud Bin  
34 26 Abdulaziz University for Health Sciences, Riyadh, Saudi Arabia; <sup>7</sup>Faculty of Medicine, Umm Al-Qura  
35 27 University, Mecca, Saudi Arabia; <sup>8</sup>Department of Respiratory Therapy, College of Applied Medical  
36 28 Sciences, King Faisal University, Al-Hasa, Saudi Arabia; Department of Physiotherapy, Prince Sultan  
37 29 Military College of Health Sciences, Dammam, Saudi Arabia  
38 30

39 31  
40 32  
41 33  
42 34 **Word count: 2675**  
43 35  
44 36  
45 37

46 38 Corresponding Author:

47 39 Abdulelah Mastour Aldhahir, PhD

48 40 Respiratory Therapy Department

49 41 Faculty of Applied Medical Sciences

50 42 Jazan University

51 43 Saudi Arabia

52 44 Phone: +966557775561

53 45 Email: [Aldhahir.abdulelah@hotmail.com](mailto:Aldhahir.abdulelah@hotmail.com)

## Abstract

**Objectives:** To assess Healthcare Providers (HCPs) attitudes toward delivering Pulmonary rehabilitation (PR) to Chronic obstructive pulmonary disease (COPD) patients, and identify factors and barriers that might influence referral.

**Design:** A cross-sectional online survey consisted of nine multiple-choice questions.

**Settings:** Kingdom of Saudi Arabia.

**Participants:** 980 HCPs included nurses, respiratory therapists, and physiotherapists.

**Primary outcome measures:** HCPs attitudes and expectations toward delivering PR to COPD patients and identify factors and barriers that might influence referral in Saudi Arabia

**Results:** Overall, 980 HCPs, (53.1%) male, completed the online survey. Nurses accounted for 40.1% of the total sample size, respiratory therapists and physiotherapists accounted for 32.1% and 16.5%, respectively. The majority of HCPs strongly agreed that PR would improve exercise capacity 589 (60.1%), health-related quality of life 571 (58.3%), and disease self-management in COPD patients 589 (60.1%). Moreover, in-hospital supervised PR program was the preferred method of delivering PR according to 374 (38.16%) HCPs. Around 85% of HCPs perceived information about COPD disease, followed by smoking cessation 787 (80.3%) and symptoms management 749 (76.4%) as essential components of PR next to exercise component. The most common patient-related factor that strongly influenced referral decisions was "mobility affected by breathlessness" (64%), while "availability of PR centres" (61%), "lack of trained HCPs" (52%) and "lack of authority to refer patients" (44%) were the most common barriers for referring.

**Conclusion:** PR is an effective management strategy for COPD patients, but sufficient PR centres, trained staff, and the authority to refer patients are lacking. An in-hospital supervised PR program is the preferred method of delivering PR, with information about COPD disease, smoking cessation and symptoms management being considered essential components of PR in addition to exercise component. Further research is needed to confirm HCP perceptions of patient-related barriers to delivering PR.

73

74

75 Keywords: PR, COPD, pulmonary rehabilitation, Saudi Arabia

76

77

78

79

80



1  
2  
3  
4 79 - **Strengths and limitations of this study**  
5

- 6 80 1. To our knowledge, this is the first national study that explores HCPs' attitudes and beliefs  
7 81 toward delivering PR to COPD patients and identify factors and barriers that might  
8 82 influence referral in Saudi Arabia  
9 83 2. Availability of PR centres, lack of trained HCPs and lack of authority to refer patients were  
10 84 the most common barriers for referring COPD patients to PR program  
11 85 3. The study was conducted during the COVID-19 pandemic, which may have impacted  
12 86 respondents' opinions.  
13  
14  
15  
16  
17  
18  
19  
20  
21  
22  
23  
24  
25  
26  
27  
28  
29  
30  
31  
32  
33  
34  
35  
36  
37  
38  
39  
40  
41  
42  
43  
44  
45  
46  
47  
48  
49  
50  
51  
52  
53  
54  
55  
56  
57  
58  
59  
60

For peer review only

## 1. Introduction

COPD is a common, preventable, and treatable disease characterized by airway and/or alveolar abnormalities, leading to airflow limitation and persistent pulmonary symptoms[1]. Patients with COPD are susceptible to daily respiratory symptoms, reduced exercise capacity and frequent chest infections that could result in deterioration of lung function and acceleration of disease progression, subsequently leading to emergency hospital admissions[1, 2]. In addition to pharmacologic approaches, the International Global Initiative for Obstructive Lung Disease (GOLD) stresses the importance of including non-pharmacologic interventions such as PR in the management of COPD symptoms as PR provides symptomatic improvement[3, 4], thereby reducing unnecessary hospital admissions.

PR is a comprehensive, multidisciplinary, non-pharmacologic intervention aimed at improving quality of life and exercise performance in patients with COPD[4-6]. PR usually consists of patient assessment with an exercise test and dyspnoea assessment, exercise training that includes endurance and resistance training, quality of life measure, nutritional with occupational evaluation and health education and is administered by a group of multidisciplinary healthcare providers[7].

There has been an increasing trend in Saudi Arabia's prevalence and incidence of COPD from 1990 to 2019 [8]. In 2019, it has been estimated that around 434,560 people had COPD in the Kingdom of Saudi Arabia[8]. This study shows that the burden of COPD is increasing, and public health policy is necessary to offset this trend. PR programs are an example of community-based primary care management that must be implemented to lessen such a burden [8]. However, in Saudi Arabia, PR programs are often unavailable or underutilized [9], ] for multiple reasons, including the lack of trained staff who can manage patients with COPD [10]. In addition, PR services across the country must be conducted under close supervision by pulmonologists or internists with an interest in pulmonary medicine, although the number of

1  
2  
3 112 chest physicians in Saudi Arabia is relatively low[11, 12]. Consequently, an inadequate number  
4  
5 113 of services are provided to meet the needs of patients with COPD.  
6  
7  
8 114 International and national COPD management guidelines recommend increasing the  
9  
10 115 implementation of PR programs worldwide by involving well-trained healthcare providers in  
11  
12 116 the PR team[5, 11, 12], considering that COPD is now perceived as a heterogeneous disease  
13  
14 117 with multisystem manifestation that causes systemic consequences[12]. Despite the current  
15  
16 118 contribution and involvement of experienced healthcare providers (e.g., nurses, respiratory  
17  
18 119 therapists, physiotherapists, psychologists, occupational therapists, and dietitians) in Saudi PR  
19  
20 120 programs, awareness of and barriers to healthcare professionals in delivering PR programs in  
21  
22 121 Saudi Arabia are limited. Recently, we have conducted a study to assess pulmonologists',  
23  
24 122 internists', and general practitioners' attitudes toward delivering PR to COPD patients and to  
25  
26 123 identify factors and barriers that might influence PR referral decisions. Our findings showed  
27  
28 124 that referral rate was low among all physicians, which was attributed to a lack of PR centres  
29  
30 125 and trained staff [13]. Giving the fact that our previous study did not survey non-physicians'  
31  
32 126 health care providers attitudes but they were implicated as a barrier to referral, the present study  
33  
34 127 aimed to explore allied healthcare professionals' attitudes and expectations toward delivering  
35  
36 128 a PR program and identify their views on factors and barriers that might influence referral of  
37  
38 129 COPD patients in Saudi Arabia.  
39  
40  
41  
42  
43  
44  
45  
46

## 131 **2. Methods**

### 132 *2.1. Study design*

133 A cross-sectional survey was conducted through an online platform (Survey Monkey) between  
134 September 15, 2021, and January 19, 2022.

### 135 136 *2.2. Questionnaire tool*

1  
2  
3 137 The survey was composed of nine multiple-choice closed questions and free text fields for  
4  
5 138 additional comments; it was structured, formulated, and validated by multidisciplinary experts  
6  
7 139 including nursing, respiratory therapy, physiotherapy, and nutrition in the field of PR based on  
8  
9 140 the currently available literature[5, 7, 14]. Before the initial distribution, content and face  
10  
11 141 validity were assessed after piloting the survey with ten healthcare professionals with a clinical  
12  
13 142 background in COPD management.  
14  
15

16  
17 143 Before participants started to answer the questionnaire, the aim of the study was provided,  
18  
19 144 together with information about the lead investigator. Additionally, no personal information  
20  
21 145 was recorded; voluntary participation was ensured by asking if participants were happy to  
22  
23 146 complete the survey or not. An additional statement was provided in the survey: “By answering  
24  
25 147 ‘yes’ in completing the survey question, you voluntarily agree to participate in this study and  
26  
27 148 give your consent to use your anonymous data for research purposes.” The time required to  
28  
29 149 complete the survey was approximately three to five minutes. The questionnaire consisted of  
30  
31 150 two pages of structured responses that involved multiple-choice answers in three sections.  
32  
33 151 Section 1 requested the respondents' demographic information, including gender, profession,  
34  
35 152 years of experience and responsibilities in the management of COPD. Section 2 consisted of  
36  
37 153 three questions asking about healthcare providers' perceptions of PR. The first question had  
38  
39 154 six statements regarding the effectiveness of PR with COPD patients and used a 5-point Likert  
40  
41 155 scale ranging from 1 = strongly disagree to 5 = strongly agree. The second question asked about  
42  
43 156 additional components of PR aside from the exercise component, and the third question was  
44  
45 157 about the best way to deliver PR for COPD patients. Section 3 included two questions regarding  
46  
47 158 patient-related factors that influence referral decisions and process-related factors that  
48  
49 159 influence the decision not to refer COPD patients. These questions used influence as a grading  
50  
51 160 tool: no influence, some influence and strong influence. (See Appendix 1)  
52  
53  
54  
55  
56  
57  
58  
59  
60

### 162 2.3. *Sampling strategy*

163 Professional committees managing respiratory diseases such as Saudi Society of Respiratory  
164 Care, Saudi Physical Therapy Association and Saudi Nurses Association, and social networks  
165 (Twitter, WhatsApp, and Telegram) were used to distribute the survey to reach a greater  
166 number of HCPs working in Saudi Arabia. Professional committees posted the survey on their  
167 social media as well as sent emails to their members. Additionally, four authors from four  
168 different medical institutions as well as from four different regions of Saudi Arabia have  
169 participated in data collection. Each data collector was responsible for distributing the survey  
170 at his/her region to HCPs to ensure all geographical areas of Saudi Arabia are covered.

### 172 2.4. *Patient and Public Involvement statement*

173 Patients were not involved.

### 175 2.5. *Sample size*

176 Convenience sampling techniques were used to recruit the study participants. nurses,  
177 respiratory therapists, physiotherapists, psychologists, occupational therapists, and nutritionists  
178 involved in managing COPD patients or having potential contact with this population were the  
179 main targets. Sample size calculation was not required, as this was an exploratory study  
180 designed.

### 182 2.6. *Ethical approval*

183 Institutional Review Board approval for the study was obtained from Jazan University,  
184 reference number (HAPO-10-Z-001).

## 186 2.7. Statistical analysis

187 Data were collected and analysed using the Statistical Package for Social Sciences (SPSS  
188 software, Version 25). The categorical variables were reported and presented in percentages  
189 and frequencies. A Chi-square ( $\chi^2$ ) test was used to assess the statistically significant difference  
190 between categorical variables. Statistical significance was considered if the  $p < 0.05$ .

## 191 3. Results

192 Overall, 980 HCPs (53.1% male) participated in the online survey between September 9, 2021,  
193 and January 19, 2022. Nurses accounted for 40.1% of the participants, followed by respiratory  
194 therapists (32.1%), physiotherapists (16.5%) and other healthcare specialties (11.2%) such as  
195 nutritionists and occupational therapists. The majority of respondents had one to two (30%) or  
196 three to four (26%) years of clinical experience in caring for COPD patients, while 15.2% had  
197 five to six years. Oxygen therapy (57%), inpatient treatment (47.1%), ongoing management  
198 (42.1%), diagnosis (38.9%), and outpatient clinics (38.1%) were the main responsibilities for  
199 managing COPD patients (Table 1).

200 **Table 1:** Demographic data and characteristics of all study respondents (n= 980).

| Demographic variables                 | Frequency (%) |
|---------------------------------------|---------------|
| Gender                                |               |
| Male                                  | 520 (53.1%)   |
| Female                                | 460 (46.9%)   |
| Profession                            |               |
| Nursing                               | 393 (40.1%)   |
| Respiratory therapy                   | 315 (32.1%)   |
| Physiotherapy                         | 162 (16.5%)   |
| Others                                | 110 (11.2%)   |
| Year of experience with COPD patients |               |
| < 1 year                              | 96 (9.8%)     |
| 1-2 years                             | 294 (30%)     |
| 3-4 years                             | 255 (26%)     |
| 5-6 years                             | 149 (15.2%)   |
| 7-8 years                             | 75 (7.7%)     |
| 9-10 years                            | 47 (6.5%)     |
| >10 years                             | 47 (4.8%)     |

| Responsibilities for care with COPD patients |             |
|----------------------------------------------|-------------|
| Diagnosis                                    | 381 (38.9%) |
| Urgent assessments                           | 350 (35.7%) |
| Non-urgent care                              | 360 (36.7%) |
| Ongoing management                           | 413 (42.1%) |
| Admission prevention                         | 227 (23.2%) |
| Medication check                             | 360 (36.7%) |
| Prescribing                                  | 106 (10.8%) |
| Oxygen therapy                               | 559 (57%)   |
| In patient treatment                         | 462 (47.1%) |
| Outpatient clinics                           | 373 (38.1%) |
| Primary care                                 | 282 (28.8%) |

Data are presented as frequencies and percentages.

### 3.1. *Healthcare providers' opinions on referring COPD patients*

Most HCPs strongly agreed that PR would improve COPD patients' exercise capacity (589, or 60.1%), and they strongly believed that PR would reduce symptoms of dyspnoea and fatigue (545, or 55.6%). In addition, most HCPs strongly agreed that PR would reduce levels of anxiety and depression (479, or 48.9%), and 571 (58.3%) strongly agreed that PR would improve patients' health-related quality of life. Moreover, 517 (52.8%) strongly agreed that PR would reduce hospital readmission, and 528 (53.9%) strongly agreed that PR would reduce the risk of future COPD exacerbation. Moreover, 440 HCPs (44.9%) strongly agreed that PR would improve patients' nutritional status, and the majority strongly agreed that PR would improve disease self-management in COPD patients (589, or 60.1%) (Table 2).

### 3.2. *Mode of delivery and components of pulmonary rehabilitation*

When asked about the preferred way to deliver a PR program for COPD patients, most HCPs believed that in-hospital supervised PR was the preferred method (748, or 76.3%), followed by delivering the PR at home (557, or 56.8%). However, only 275 (28.1%) believed that tailored PR with healthcare provider support over the phone would be the preferred method. Most HCPs believed that the essential components of PR include information about COPD disease (832,

221 or 84.9%), followed by smoking cessation (787, or 80.3%) and COPD symptoms management  
 222 (749, or 76.4%), aside from the exercise component (Table 3).

223  
 224 **Table 2:** Healthcare providers' perception on referring COPD patients to PR (n=980).

| Item                                                                      | Frequency (%) |
|---------------------------------------------------------------------------|---------------|
| <b>Perception on referring COPD patients to PR</b>                        |               |
| <i>I believe PR will improve patients' exercise capacity</i>              |               |
| Strongly agree                                                            | 589 (60.1%)   |
| Agree                                                                     | 260 (26.5%)   |
| Neutral                                                                   | 32 (3.3%)     |
| Disagree                                                                  | 8 (0.8%)      |
| Strongly disagree                                                         | 91 (9.3%)     |
| <i>I believe PR would reduce dyspnoea and fatigue</i>                     |               |
| Strongly agree                                                            | 545 (55.6%)   |
| Agree                                                                     | 297 (30.3%)   |
| Neutral                                                                   | 62 (6.3%)     |
| Disagree                                                                  | 25 (2.6%)     |
| Strongly disagree                                                         | 51 (5.2%)     |
| <i>I believe PR will improve patients' anxiety and depression</i>         |               |
| Strongly agree                                                            | 479 (48.9%)   |
| Agree                                                                     | 320 (32.7%)   |
| Neutral                                                                   | 105 (10.7%)   |
| Disagree                                                                  | 29 (3%)       |
| Strongly disagree                                                         | 47 (4.8%)     |
| <i>I believe PR will improve patients' health-related quality of life</i> |               |
| Strongly agree                                                            | 571 (58.3%)   |
| Agree                                                                     | 283 (28.9%)   |
| Neutral                                                                   | 57 (5.8%)     |
| Disagree                                                                  | 19 (1.9%)     |
| Strongly disagree                                                         | 50 (5.1%)     |
| <i>I believe PR will reduce the risk hospital readmission</i>             |               |
| Strongly agree                                                            | 517 (52.8%)   |
| Agree                                                                     | 317 (32.3%)   |
| Neutral                                                                   | 70 (7.1%)     |
| Disagree                                                                  | 28 (2.9%)     |
| Strongly disagree                                                         | 48 (4.9%)     |
| <i>I believe PR will reduce the risk of future COPD exacerbation</i>      |               |
| Strongly agree                                                            | 528 (53.9%)   |
| Agree                                                                     | 305 (31.1%)   |
| Neutral                                                                   | 78 (8%)       |
| Disagree                                                                  | 18 (1.8%)     |
| Strongly disagree                                                         | 51 (5.2%)     |
| <i>I believe PR will improve patients' nutritional status</i>             |               |
| Strongly agree                                                            | 440 (44.9%)   |
| Agree                                                                     | 341 (34.8%)   |
| Neutral                                                                   | 117 (11.9%)   |
| Disagree                                                                  | 28 (2.9%)     |
| Strongly disagree                                                         | 54 (5.5%)     |
| <i>I believe PR will improve patients' disease self-management</i>        |               |
| Strongly agree                                                            | 589 (60.1%)   |
| Agree                                                                     | 260 (26.5%)   |
| Neutral                                                                   | 32 (3.3%)     |



|                   |           |
|-------------------|-----------|
| Disagree          | 8 (0.8%)  |
| Strongly disagree | 91 (9.3%) |

Data are presented as frequencies and percentages.

**Table 3:** Mode of delivery and component of PR (n=980).

| Item                                                            | Frequency (%) |
|-----------------------------------------------------------------|---------------|
| <b>The best way to deliver PR program for COPD patients</b>     |               |
| In hospital supervised program                                  | 374 (38.16%)  |
| At home                                                         | 276 (28.16%)  |
| Online program with healthcare provider support                 | 192 (19.59%)  |
| Tailored program with healthcare provider support through phone | 138 (14.08%)  |
| <b>Component of PR program aside from exercise component</b>    |               |
| Information about COPD disease                                  | 832 (84.9%)   |
| Smoking cessation                                               | 787 (80.3%)   |
| Symptoms management                                             | 749 (76.4%)   |
| Psychological support                                           | 671 (68.5%)   |
| Information about medications                                   | 648 (66.1%)   |
| Nutritional counselling                                         | 526 (53.7%)   |

Data are presented as frequencies and percentages.

### 3.3. *Patient-related factors that influence referral decisions to pulmonary rehabilitation*

The main factors that strongly influenced the decision to refer COPD patients to PR from the HCPs' perspective included mobility affected by patients' breathlessness (64.10%), followed by low activity levels (61.60%), low exercise tolerance (58.20%), patient fatigue related to COPD (52.90%), and patient anxiety related to COPD (50.70%) (Figure 1).

### 3.4. *Pulmonary rehabilitation referral barriers*

From the HCPs' perspective, the main barriers that strongly affect the referral process for COPD patients included a lack of available PR centres (61.80%), followed by a lack of trained HCPs who could manage COPD patients (52.70%) and the lack of authority to refer a patient (44.30%). In addition, 43% reported that patients might refuse the referral process (Figure 2).

## 4. Discussion

1  
2  
3 244 To the best of our knowledge, this is the first national study that explores assess non physician  
4  
5 245 HCPs attitudes and expectation toward delivering PR to COPD patients and identify factors  
6  
7  
8 246 and barriers that might influence referral in Saudi Arabia. Findings show that HCPs perceived  
9  
10 247 PR as an effective management strategy in improving clinical outcomes in COPD. While a  
11  
12 248 supervised hospital-based program was seen as the preferred mode of delivery, the lack of PR  
13  
14 249 centres, well-trained staff, and the authority to refer posed significant barriers to PR referrals.  
15  
16  
17 250 HCPs perceived patients' education about COPD disease, smoking cessation and symptoms  
18  
19 251 management as the most essential components of PR program next to exercise component.  
20  
21 252 PR has established a solid position as the cornerstone of the management of patients with  
22  
23 253 COPD. Indeed, current evidence shows that PR alleviates exercise limitations and dyspnoea,  
24  
25 254 improves nutritional status and psychological well-being, and reduces hospitalizations, future  
26  
27 255 COPD exacerbations, and mortality rates[5, 15, 16]. In our study, HCPs perceived mobility  
28  
29 256 affected by breathlessness, low activity levels, and low exercise tolerance as the most common  
30  
31 257 factors that influence referral decision which are in accordance with current international  
32  
33 258 guidelines [17, 18]. According to National Institute for Health and Care Excellence (NICE)  
34  
35 259 and British Thoracic Society (BTS) PR should be offer to patients who are short of breath and  
36  
37 260 functionally limited due to breathlessness [17, 18]. All these reported factors that influence  
38  
39 261 referral have been showed to effectively improved in COPD patients who were enrolled in  
40  
41 262 PR[19].  
42  
43  
44  
45  
46 263 Despite the current evidence of PR effectiveness, the global referral rate is currently  
47  
48 264 suboptimal[13, 20, 21]. Current international COPD guidelines recommend the involvement  
49  
50 265 of experienced HCPs in the referral management of COPD patients; however, referral to PR  
51  
52 266 cannot be performed without physicians' permission in Saudi Arabia[17, 19, 21-23]. In the  
53  
54 267 current study, nearly half of the participants believed that a lack of authority to refer posed a  
55  
56 268 significant barrier to PR referral. Therefore, experienced HCPs who are part of the PR team or  
57  
58  
59  
60

1  
2  
3 269 COPD management should promote physicians' knowledge about PR and its benefit to  
4  
5  
6 270 enhance PR referral rate.  
7  
8 271 Reasons for not referring patients with COPD to PR programs are likely to be multifactorial;  
9  
10 272 lack of available PR centres is at top of the list, as shown in this study which is in accordance  
11  
12 273 with recent study included physicians and concluded that limited PR centres was the cause of  
13  
14 274 low PR referral[13]. Saudi Arabia has a limited number of PR centres, and the number of people  
15  
16 275 who can access these centres is extremely low[9]. This contrasts, for instance, with the situation  
17  
18 276 in the UK, which has 228 PR services. The gap in the current practice is therefore clear, and  
19  
20 277 the establishment of new PR programs needs to be facilitated across the country. It is however  
21  
22 278 important to mention that PR programs can be offered within the existing infrastructure using  
23  
24 279 the incumbent HCPs in the hospitals[24]. It has been previously demonstrated that an outpatient  
25  
26 280 PR program offered at a small hospital is as effective as a program offered in a large  
27  
28 281 hospital[25]. Current evidence also suggests that PR can be effectively offered using different  
29  
30 282 modalities, including inpatient, community-based, home settings or online[25, 26]. Thus, any  
31  
32 283 of these modes of delivery can be adopted according to the hospital's available resources.  
33  
34  
35 284 Participants in this study also perceived the lack of well-trained staff as a major barrier to PR  
36  
37 285 referral, in concordance with the current literature[13, 19, 21]. Studies show that Saudi Arabia  
38  
39 286 suffers from a severe shortage of healthcare professionals and that only limited specialties  
40  
41 287 participate in the management of COPD[27, 28]. Evidence suggests that COPD management  
42  
43 288 is much better if performed by a multidisciplinary team[28, 29], highlighting the need for an  
44  
45 289 integrated approach. It is however important to mention that the number of specialized  
46  
47 290 physicians and healthcare professionals (e.g., respiratory nurses and respiratory  
48  
49 291 physiotherapists) is, overall, low[27, 28], which could affect the quality of COPD care in the  
50  
51 292 country. Therefore, the healthcare authority in Saudi Arabia should take action to reduce the  
52  
53 293 current shortage by providing training incentives to people willing to specialize in respiratory  
54  
55  
56  
57  
58  
59  
60

1  
2  
3 294 medicine and encouraging the upskilling of current healthcare workers. In addition, offering  
4  
5 295 high-quality education either inside or outside the country could be a useful approach to  
6  
7  
8 296 stimulate this change.

9  
10 297 Almost half of the study participants perceived “patients might refuse the referral” as a major  
11  
12 298 barrier to refer COPD patients to PR which is in accordance with recent study included  
13  
14 299 physicians and concluded that 46% perceived patients refuse referral is a major barrier[13].  
15  
16  
17 300 This may be due to the lack of patients’ knowledge about the PR and its benefit to their  
18  
19 301 condition as well as travel distance to PR[19, 30, 31]. Therefore, incorporating patients’  
20  
21 302 preferences of PR delivery mode and increasing awareness of PR and its benefit among COPD  
22  
23 303 population are needed.

24  
25  
26 304 Almost 80% of HCPs in this study considered supervised hospital-based programs the  
27  
28 305 preferred mode of PR delivery, despite the limited number of PR centres in the country. This  
29  
30 306 is likely because of a lack of knowledge about PR services in Saudi Arabia, as only a small  
31  
32 307 proportion of HCPs know what PR is[10]. However, utilizing the available resources within  
33  
34  
35 308 the infrastructure of the hospital remains possible for setting up and delivering a PR program.  
36  
37 309 Alternatively, home settings, which are as effective as conventional PR programs in improving  
38  
39 310 exercise capacity and respiratory symptoms[32], could be considered a viable option.

40  
41  
42 311 In this study, most HCPs believed that information about COPD disease, smoking cessation  
43  
44 312 and symptoms management are the most important components of a PR program. Indeed,  
45  
46 313 disease-related education contributes to patients’ recognition of their symptoms and worsening  
47  
48 314 disease[33]. However, the content of the PR educational program, who delivers it, and how it  
49  
50 315 is delivered remain unclear. According to the ATS/ERS official consensus, smoking cessation  
51  
52 316 is a major component of a PR program[7, 14]. It is the primary cause of COPD, with the  
53  
54 317 prevalence of COPD smokers ranging from 38% to 77%[34]. In addition, smoking contributes  
55  
56 318 to 73% of COPD-related deaths worldwide[35]. Smoking is also associated with accelerated  
57  
58  
59  
60

1  
2  
3 319 lung function declines, higher COPD exacerbations[36, 37], and increased dropout rates from  
4  
5  
6 320 PR. Therefore, support for smoking cessation should be offered throughout the PR program.  
7  
8 321 Further research is needed to address COPD patients' attitudes and expectations toward  
9  
10 322 delivering a PR program and identify factors and barriers of referring. Additionally, future  
11  
12 323 research should also focus on suitable mode of delivering PR as well as essential components  
13  
14  
15 324 from patients' perspective.  
16  
17  
18  
19  
20  
21

#### 22 327 *4.1. limitations*

23  
24 328 Convenience sample techniques were used in the study, which may impose a selection bias.  
25  
26  
27 329 In this study, we did not survey or interview physicians who are part of COPD management.  
28  
29 330 Additionally, we have failed to report the geographic distribution of the respondents.  
30  
31 331 Moreover, the exact number of HCPs' who involved in PR as well as with COPD patients;  
32  
33 332 therefore, the sample of our study may not represent the general population of HCPs. Finally,  
34  
35  
36 333 the study was conducted during the COVID-19 pandemic, which may have impacted  
37  
38 334 respondents' opinions, especially, 28% of the total respondents reported that home PR is the  
39  
40  
41 335 prefer method of delivering PR from their perspective.  
42  
43  
44

## 45 337 **5. Conclusion**

46  
47  
48 338 HCPs across specialties agreed on the effectiveness of PR. A supervised hospital-based  
49  
50 339 program was the preferred mode of PR delivery although limited PR services existed. Lack of  
51  
52 340 PR centres, well-trained staff, and the authority to refer were major barriers to referring COPD  
53  
54  
55 341 patients. Patients' education, smoking cessation and symptoms management were perceived as  
56  
57 342 essential components of the PR program, in addition to the exercise component.  
58  
59  
60 343

1  
2  
3 344 **Contributors**  
4

5  
6 345 The study was designed by A.A., M.A., and J.S.A. Data collection was performed by A.A.A,  
7 346 I.A.A, H.W, and A.S.A, statistical methodology was performed by A.A, and formal analysis  
8  
9 347 was performed by A.H, Y.S.A and S.M.A. The draft of the manuscript was written by A.M.A,  
10  
11 348 A.A.A, I.A.A, R.A.S, E.M.A and M.A, and reviewed and revised by E.M.A, J.S.A., H.W and  
12  
13 349 S.M.A. All authors approved the paper for publication.  
14

15  
16 350

17  
18 351 **Funding:** This research received no specific grant from any funding agency in the public,  
19  
20 352 commercial or not-for-profit sectors

21  
22 353 **Competing interests:** No, there are no competing interests for any author.

23  
24 354 **Patient consent for publication:** Not required

25  
26 355 **Ethics approval:** Institutional Review Board approval for the study was obtained from Jazan  
27  
28 356 University, reference number (HAPO-10-Z-001).

29  
30 357 **Provenance and peer review:** Not commissioned; externally peer reviewed.

31  
32 358 **Data availability statement:** Data are available upon reasonable request.  
33  
34  
35  
36  
37  
38  
39  
40  
41  
42  
43  
44  
45  
46  
47  
48  
49  
50  
51  
52  
53  
54  
55  
56  
57  
58  
59  
60

## References

1. Halpin, D.M.G., et al., *Global Initiative for the Diagnosis, Management, and Prevention of Chronic Obstructive Lung Disease. The 2020 GOLD Science Committee Report on COVID-19 and Chronic Obstructive Pulmonary Disease*. Am J Respir Crit Care Med, 2021. **203**(1): p. 24-36.
2. Alqahtani, J.S., et al., *Risk factors for all-cause hospital readmission following exacerbation of COPD: a systematic review and meta-analysis*. Eur Respir Rev, 2020. **29**(156).
3. von Trott, P., S.L. Oei, and C. Ramsenthaler, *Acupuncture for Breathlessness in Advanced Diseases: A Systematic Review and Meta-analysis*. J Pain Symptom Manage, 2020. **59**(2): p. 327-338 e3.
4. Evans, R.A. and S.J. Singh, *Minimum important difference of the incremental shuttle walk test distance in patients with COPD*. Thorax, 2019. **74**(10): p. 994-995.
5. Spruit, M.A., et al., *An official American Thoracic Society/European Respiratory Society statement: key concepts and advances in pulmonary rehabilitation*. Am J Respir Crit Care Med, 2013. **188**(8): p. e13-64.
6. Sahin, H., et al., *Is a pulmonary rehabilitation program effective in COPD patients with chronic hypercapnic failure?* Expert Rev Respir Med, 2016. **10**(5): p. 593-8.
7. Holland, A.E., et al., *Defining Modern Pulmonary Rehabilitation. An Official American Thoracic Society Workshop Report*. Annals of the American Thoracic Society, 2021. **18**(5): p. e12-e29.
8. Alqahtani, J.S., *Prevalence, incidence, morbidity and mortality rates of COPD in Saudi Arabia: Trends in burden of COPD from 1990 to 2019*. PLOS ONE, 2022. **17**(5): p. e0268772.
9. Aldhahir, A.M., et al., *Pulmonary rehabilitation for COPD: A narrative review and call for further implementation in Saudi Arabia*. Ann Thorac Med, 2021. **16**(4): p. 299-305.
10. Alsubaiei, M.E., et al., *Barriers for setting up a pulmonary rehabilitation program in the Eastern Province of Saudi Arabia*. Ann Thorac Med, 2016. **11**(2): p. 121-7.
11. Khan, J.H., et al., *The Saudi Guidelines for the Diagnosis and Management of COPD*. Ann Thorac Med, 2014. **9**(2): p. 55-76.
12. Celli, B.R., et al., *An Official American Thoracic Society/European Respiratory Society Statement: Research questions in chronic obstructive pulmonary disease*. Am J Respir Crit Care Med, 2015. **191**(7): p. e4-e27.
13. Aldhahir, A.M., et al., *Physicians' Attitudes, Beliefs and Barriers to a Pulmonary Rehabilitation for COPD Patients in Saudi Arabia: A Cross-Sectional Study*. Healthcare, 2022. **10**(5).
14. Hill, K., I. Vogiatzis, and C. Burtin, *The importance of components of pulmonary rehabilitation, other than exercise training, in COPD*. European Respiratory Review, 2013. **22**(129): p. 405.
15. Vogelmeier, C.F., et al., *Global strategy for the diagnosis, management, and prevention of chronic obstructive lung disease 2017 report*. American Journal of Respiratory and Critical Care Medicine, 2017. **195**(5): p. 557-582.
16. Aldhahir, A.M., et al., *Nutritional supplementation during pulmonary rehabilitation in COPD: A systematic review*. Chron Respir Dis, 2020. **17**: p. 1479973120904953.



17. Bolton, C.E., et al., *British Thoracic Society guideline on pulmonary rehabilitation in adults: accredited by NICE*. Thorax, 2013. **68**(Suppl 2): p. ii1.
18. National Institute for Health and Care Excellence: *Guidelines, in Chronic obstructive pulmonary disease in over 16s: diagnosis and management*. 2019, National Institute for Health and Care Excellence (NICE)  
Copyright © NICE 2018.: London.
19. Rochester, C.L., et al., *An Official American Thoracic Society/European Respiratory Society Policy Statement: Enhancing Implementation, Use, and Delivery of Pulmonary Rehabilitation*. American Journal of Respiratory and Critical Care Medicine, 2015. **192**(11): p. 1373-1386.
20. Milner, S.C., et al., *Rate of, and barriers and enablers to, pulmonary rehabilitation referral in COPD: A systematic scoping review*. Respir Med, 2018. **137**: p. 103-114.
21. Johnston, K.N., et al., *Barriers to, and facilitators for, referral to pulmonary rehabilitation in COPD patients from the perspective of Australian general practitioners: a qualitative study*. Primary Care Respiratory Journal, 2013. **22**(3): p. 319-324.
22. Hogg, L., et al., *Effectiveness, Attendance, and Completion of an Integrated, System-Wide Pulmonary Rehabilitation Service for COPD: Prospective Observational Study*. COPD: Journal of Chronic Obstructive Pulmonary Disease, 2012. **9**(5): p. 546-554.
23. Khan, J.H., et al., *The Saudi Guidelines for the Diagnosis and Management of COPD*. Annals of thoracic medicine, 2014. **9**(2): p. 55-76.
24. Jenkins, S., K. Hill, and N.M. Cecins, *State of the art: how to set up a pulmonary rehabilitation program*. Respirology, 2010. **15**(8): p. 1157-73.
25. Ward, J.A., et al., *Feasibility and effectiveness of a pulmonary rehabilitation programme in a community hospital setting*. Br J Gen Pract, 2002. **52**(480): p. 539-42.
26. Maltais, F., et al., *Effects of home-based pulmonary rehabilitation in patients with chronic obstructive pulmonary disease: a randomized trial*. Ann Intern Med, 2008. **149**(12): p. 869-78.
27. Aboshaiqah, A., *Strategies to address the nursing shortage in Saudi Arabia*. International Nursing Review, 2016. **63**(3): p. 499-506.
28. Alsubaiei, M., et al., *Factors influencing management of chronic respiratory diseases in general and chronic obstructive pulmonary disease in particular in Saudi Arabia: An overview*. Annals of Thoracic Medicine, 2018. **13**(3): p. 144-149.
29. Kuzma, A.M., et al., *Multidisciplinary care of the patient with chronic obstructive pulmonary disease*. Proceedings of the American Thoracic Society, 2008. **5**(4): p. 567-571.
30. Cox, N.S., et al., *Pulmonary rehabilitation referral and participation are commonly influenced by environment, knowledge, and beliefs about consequences: a systematic review using the Theoretical Domains Framework*. Journal of Physiotherapy, 2017. **63**(2): p. 84-93.
31. Lahham, A. and A.E. Holland, *The Need for Expanding Pulmonary Rehabilitation Services*. Life (Basel, Switzerland), 2021. **11**(11): p. 1236.
32. McCarthy, B., et al., *Pulmonary rehabilitation for chronic obstructive pulmonary disease*. Cochrane Database Syst Rev, 2015(2): p. Cd003793.



- 1  
2  
3  
4  
5  
6  
7  
8  
9  
10  
11  
12  
13  
14  
15  
16  
17  
18  
19
33. Crisafulli, E., et al., *Learning impact of education during pulmonary rehabilitation program. An observational short-term cohort study*. *Monaldi Arch Chest Dis*, 2010. **73**(2): p. 64-71.
  34. Tønnesen, P., *Smoking cessation and COPD*. *European Respiratory Review*, 2013. **22**(127): p. 37.
  35. MacNee, W., *Chronic obstructive pulmonary disease*. 5 ed. 2010: Oxford University Press. 3311-3344.
  36. Badaran, E., et al., *Smoking and COPD exacerbations*. *European Respiratory Journal*, 2012. **40**(Suppl 56): p. P1055.
  37. Brown, A.T., et al., *Determinants of successful completion of pulmonary rehabilitation in COPD*. *International journal of chronic obstructive pulmonary disease*, 2016. **11**: p. 391-397.

20  
21  
22

### Figure legend:

23  
24  
25

**Figure 1:** Patient-related factors that influence referral decision to PR, using strong, some or no influence grading.

26  
27  
28  
29

**Figure 2:** Barriers to referring COPD patients to PR from HCPs perspective, using strong, some or no influence grading.



Patient-related factors that influence referral decision to PR, using strong, some or no influence grading.

247x139mm (330 x 330 DPI)



Barriers to referring COPD patients to PR from HCPs perspective, using strong, some or no influence grading.

247x138mm (330 x 330 DPI)

## Staff Attitudes and Expectations regarding a pulmonary rehabilitation for Chronic obstructive pulmonary disease patients.

We are aiming to understand your attitude and expectations toward delivering a Pulmonary rehabilitation programme for patients with Chronic obstructive pulmonary disease (COPD), and it would be great if you could answer this questionnaire.

Please fill out the survey, be informed that your identity will be completely anonymous and no personal identifying information will be collected and there are no consequences for refusing to participate, your participation is voluntary. This survey will only take 5 minutes to complete.

By answering the first question, you voluntarily agree to participate in this study and give your consent to use your anonymous data for research purposes.

### I. Demographic Information

1. Your Gender?

- A. Male
- B. Female

2. Your Profession?

- A. Nurse
- B. Respiratory therapist
- C. Physiotherapist
- D. Other:

3. What responsibilities do you have for the care of people with COPD? Tick all that apply.

- |                                             |                                               |                                                     |
|---------------------------------------------|-----------------------------------------------|-----------------------------------------------------|
| <input type="checkbox"/> Diagnosis          | <input type="checkbox"/> Prescribing          | <input type="checkbox"/> Inpatient treatment        |
| <input type="checkbox"/> Non-urgent care    | <input type="checkbox"/> Ongoing management   | <input type="checkbox"/> Outpatient clinics         |
| <input type="checkbox"/> Urgent assessments | <input type="checkbox"/> Admission prevention | <input type="checkbox"/> Primary care               |
| <input type="checkbox"/> Oxygen therapy     | <input type="checkbox"/> Medication checks    | <input type="checkbox"/> Other: please give details |

4. How many years of experience do you have of caring for people with COPD?

Please enter a whole number.

## II. Perceptions of a rehabilitation programme

5. For each statement please select the answer that best suits your opinion.

|                                                                                                      | Strongly disagree        | Disagree                 | Neutral                  | Agree                    | Strongly agree           |
|------------------------------------------------------------------------------------------------------|--------------------------|--------------------------|--------------------------|--------------------------|--------------------------|
| I believe that pulmonary rehabilitation programme will improve patients exercise capacity.           | <input type="checkbox"/> |
| I believe that pulmonary rehabilitation programme would be beneficial in reducing dyspnea & fatigue. | <input type="checkbox"/> |
| I believe that pulmonary rehabilitation programme will improve patient anxiety and depression        | <input type="checkbox"/> |
| I believe that pulmonary rehabilitation programme will improve health-related quality of life.       | <input type="checkbox"/> |
| I believe that pulmonary rehabilitation programme would help in reducing hospital readmission        | <input type="checkbox"/> |
| I think that pulmonary rehabilitation will reduces the risk of COPD exacerbation                     | <input type="checkbox"/> |
| I believe that pulmonary rehabilitation programme will improve patient nutritional status            | <input type="checkbox"/> |
| I believe that pulmonary rehabilitation programme will improve patient disease self-management       | <input type="checkbox"/> |

6. What do you think that pulmonary rehabilitation programme for individuals with COPD should contain aside from an exercise programme? Tick all that apply.

- |                                                         |                                                      |
|---------------------------------------------------------|------------------------------------------------------|
| <input type="checkbox"/> Information about COPD disease | <input type="checkbox"/> Symptoms management         |
| <input type="checkbox"/> Nutritional counseling         | <input type="checkbox"/> Smoking cessation           |
| <input type="checkbox"/> Psychological support          | <input type="checkbox"/> Others: please give details |
| <input type="checkbox"/> Information about medications  |                                                      |

If other, please give details

7. **What do you think is the best way to deliver a pulmonary rehabilitation programme for this population.**

- At the hospital. Where they can follow a programme supervised by healthcare professionals.
- By using an online programme with support from a healthcare professional to answer their questions.
- At home. Where they can follow a programme manual with the support of healthcare professionals.
- By following a tailored programme with the support of health care professionals through the phone.

**III. Referral to rehabilitation programme**

8. **In your opinion, what factors might influence decision to refer COPD patients to a pulmonary rehabilitation programme?**

|                                          | No influence             | Some influence           | Strong influence         |
|------------------------------------------|--------------------------|--------------------------|--------------------------|
| Mobility, affected by breathlessness     | <input type="checkbox"/> | <input type="checkbox"/> | <input type="checkbox"/> |
| Decreased activity levels                | <input type="checkbox"/> | <input type="checkbox"/> | <input type="checkbox"/> |
| Low exercise tolerance                   | <input type="checkbox"/> | <input type="checkbox"/> | <input type="checkbox"/> |
| Patient anxiety related to disease       | <input type="checkbox"/> | <input type="checkbox"/> | <input type="checkbox"/> |
| Depression related to disease            | <input type="checkbox"/> | <input type="checkbox"/> | <input type="checkbox"/> |
| Patient education and disease management | <input type="checkbox"/> | <input type="checkbox"/> | <input type="checkbox"/> |
| Fatigue related to disease               | <input type="checkbox"/> | <input type="checkbox"/> | <input type="checkbox"/> |
| Dietary advice                           | <input type="checkbox"/> | <input type="checkbox"/> | <input type="checkbox"/> |
| Others please give details               |                          |                          |                          |

9. **In your opinion, what factors might influence decision Not to refer COPD patients to a pulmonary rehabilitation programme ?**

|                                                                                    | No influence             | Some influence           | Strong influence         |
|------------------------------------------------------------------------------------|--------------------------|--------------------------|--------------------------|
| I don't have enough information about pulmonary rehabilitation programme           | <input type="checkbox"/> | <input type="checkbox"/> | <input type="checkbox"/> |
| I'm uncertain that the programme is worthwhile                                     | <input type="checkbox"/> | <input type="checkbox"/> | <input type="checkbox"/> |
| Patient refuses referral                                                           | <input type="checkbox"/> | <input type="checkbox"/> | <input type="checkbox"/> |
| Patient co-morbidities                                                             | <input type="checkbox"/> | <input type="checkbox"/> | <input type="checkbox"/> |
| Patient has doubts that rehabilitation is worthwhile                               | <input type="checkbox"/> | <input type="checkbox"/> | <input type="checkbox"/> |
| Transportation problems                                                            | <input type="checkbox"/> | <input type="checkbox"/> | <input type="checkbox"/> |
| Timing of classes not convenient for patient                                       | <input type="checkbox"/> | <input type="checkbox"/> | <input type="checkbox"/> |
| Lack of authority to refer patients                                                | <input type="checkbox"/> | <input type="checkbox"/> | <input type="checkbox"/> |
| Lack of trained staff who can manage COPD patients during pulmonary rehabilitation | <input type="checkbox"/> | <input type="checkbox"/> | <input type="checkbox"/> |
| Treatment cost                                                                     | <input type="checkbox"/> | <input type="checkbox"/> | <input type="checkbox"/> |
| Availability of pulmonary rehabilitation centers                                   | <input type="checkbox"/> | <input type="checkbox"/> | <input type="checkbox"/> |
| Others please give details                                                         |                          |                          |                          |

1  
2  
3  
4  
5  
6  
7  
8  
9  
10  
11  
12  
13  
14  
15  
16  
17  
18  
19  
20  
21  
22  
23  
24  
25  
26  
27  
28  
29  
30  
31  
32  
33  
34  
35  
36  
37  
38  
39  
40  
41  
42  
43  
44  
45  
46  
47  
48  
49  
50  
51  
52  
53  
54  
55  
56  
57  
58  
59  
60STROBE Statement—Checklist of items that should be included in reports of *cross-sectional studies*

|                              | <b>Item No</b> | <b>Recommendation</b>                                                                                                                                                                             | <b>Page number<br/>Line number</b> |
|------------------------------|----------------|---------------------------------------------------------------------------------------------------------------------------------------------------------------------------------------------------|------------------------------------|
| <b>Title and abstract</b>    | 1              | (a) Indicate the study's design with a commonly used term in the title or the abstract                                                                                                            | P: 1, Line: 3                      |
|                              |                | (b) Provide in the abstract an informative and balanced summary of what was done and what was found                                                                                               | P: 2,<br>Lines:46-73               |
| <b>Introduction</b>          |                |                                                                                                                                                                                                   |                                    |
| Background/rationale         | 2              | Explain the scientific background and rationale for the investigation being reported                                                                                                              | Pages 4 and 5                      |
| Objectives                   | 3              | State specific objectives, including any prespecified hypotheses                                                                                                                                  | Page 5,<br>lines:127-129           |
| <b>Methods</b>               |                |                                                                                                                                                                                                   |                                    |
| Study design                 | 4              | Present key elements of study design early in the paper                                                                                                                                           | Page 5<br>Lines:133-134            |
| Setting                      | 5              | Describe the setting, locations, and relevant dates, including periods of recruitment, exposure, follow-up, and data collection                                                                   | Page 7<br>Lines:163-169            |
| Participants                 | 6              | (a) Give the eligibility criteria, and the sources and methods of selection of participants                                                                                                       | Page 7<br>Lines:163-169            |
| Variables                    | 7              | Clearly define all outcomes, exposures, predictors, potential confounders, and effect modifiers. Give diagnostic criteria, if applicable                                                          | N/A                                |
| Data sources/<br>measurement | 8*             | For each variable of interest, give sources of data and details of methods of assessment (measurement). Describe comparability of assessment methods if there is more than one group              | Page 6<br>Lines:137-160            |
| Bias                         | 9              | Describe any efforts to address potential sources of bias                                                                                                                                         | N/A                                |
| Study size                   | 10             | Explain how the study size was arrived at                                                                                                                                                         | Page 7,<br>Line:175                |
| Quantitative<br>variables    | 11             | Explain how quantitative variables were handled in the analyses. If applicable, describe which groupings were chosen and why                                                                      | N/A                                |
| Statistical methods          | 12             | (a) Describe all statistical methods, including those used to control for confounding                                                                                                             | Page 7<br>Lines:182-185            |
|                              |                | (b) Describe any methods used to examine subgroups and interactions                                                                                                                               | N/A                                |
|                              |                | (c) Explain how missing data were addressed                                                                                                                                                       | N/A                                |
|                              |                | (d) If applicable, describe analytical methods taking account of sampling strategy                                                                                                                | N/A                                |
|                              |                | (e) Describe any sensitivity analyses                                                                                                                                                             | N/A                                |
| <b>Results</b>               |                |                                                                                                                                                                                                   |                                    |
| Participants                 | 13*            | (a) Report numbers of individuals at each stage of study—eg numbers potentially eligible, examined for eligibility, confirmed eligible, included in the study, completing follow-up, and analysed | Page 8<br>Lines:187-188            |
|                              |                | (b) Give reasons for non-participation at each stage                                                                                                                                              | N/A                                |
|                              |                | (c) Consider use of a flow diagram                                                                                                                                                                | N/A                                |
| Descriptive data             | 14*            | (a) Give characteristics of study participants (eg demographic, clinical, social) and information on exposures and potential confounders                                                          | Page 8:<br>Table 1                 |
|                              |                | (b) Indicate number of participants with missing data for each variable of interest                                                                                                               | N/A                                |

|                          |     |                                                                                                                                                                                                              |                              |
|--------------------------|-----|--------------------------------------------------------------------------------------------------------------------------------------------------------------------------------------------------------------|------------------------------|
| Outcome data             | 15* | Report numbers of outcome events or summary measures                                                                                                                                                         | Pages 9-11                   |
| Main results             | 16  | (a) Give unadjusted estimates and, if applicable, confounder-adjusted estimates and their precision (eg, 95% confidence interval). Make clear which confounders were adjusted for and why they were included | N/A                          |
|                          |     | (b) Report category boundaries when continuous variables were categorized                                                                                                                                    | N/A                          |
|                          |     | (c) If relevant, consider translating estimates of relative risk into absolute risk for a meaningful time period                                                                                             | N/A                          |
| Other analyses           | 17  | Report other analyses done—eg analyses of subgroups and interactions, and sensitivity analyses                                                                                                               | N/A                          |
| <b>Discussion</b>        |     |                                                                                                                                                                                                              |                              |
| Key results              | 18  | Summarise key results with reference to study objectives                                                                                                                                                     | Pages 11-12<br>Lines:238-245 |
| Limitations              | 19  | Discuss limitations of the study, taking into account sources of potential bias or imprecision. Discuss both direction and magnitude of any potential bias                                                   | Page:15<br>Lines:318-322     |
| Interpretation           | 20  | Give a cautious overall interpretation of results considering objectives, limitations, multiplicity of analyses, results from similar studies, and other relevant evidence                                   | Pages 11-14<br>Lines:238-315 |
| Generalisability         | 21  | Discuss the generalisability (external validity) of the study results                                                                                                                                        | N/A                          |
| <b>Other information</b> |     |                                                                                                                                                                                                              |                              |
| Funding                  | 22  | Give the source of funding and the role of the funders for the present study and, if applicable, for the original study on which the present article is based                                                | Page 15<br>Line:338          |

\*Give information separately for exposed and unexposed groups.

**Note:** An Explanation and Elaboration article discusses each checklist item and gives methodological background and published examples of transparent reporting. The STROBE checklist is best used in conjunction with this article (freely available on the Web sites of PLoS Medicine at <http://www.plosmedicine.org/>, Annals of Internal Medicine at <http://www.annals.org/>, and Epidemiology at <http://www.epidem.com/>). Information on the STROBE Initiative is available at [www.strobe-statement.org](http://www.strobe-statement.org).



# BMJ Open

## Healthcare Providers' Attitudes, Beliefs and Barriers to Pulmonary Rehabilitation for Chronic Obstructive Pulmonary Disease Patients in Saudi Arabia: A Cross-Sectional Study

|                                 |                                                                                                                                                                                                                                                                                                                                                                                                                                                                                                                                                                                                                                                                                                                                                                                                                                                                                                                                                                                                                                                                                                                                                                                                                                                                                                                                                                                                                                                                                                                                                                                                                                                                                                                                                        |
|---------------------------------|--------------------------------------------------------------------------------------------------------------------------------------------------------------------------------------------------------------------------------------------------------------------------------------------------------------------------------------------------------------------------------------------------------------------------------------------------------------------------------------------------------------------------------------------------------------------------------------------------------------------------------------------------------------------------------------------------------------------------------------------------------------------------------------------------------------------------------------------------------------------------------------------------------------------------------------------------------------------------------------------------------------------------------------------------------------------------------------------------------------------------------------------------------------------------------------------------------------------------------------------------------------------------------------------------------------------------------------------------------------------------------------------------------------------------------------------------------------------------------------------------------------------------------------------------------------------------------------------------------------------------------------------------------------------------------------------------------------------------------------------------------|
| Journal:                        | <i>BMJ Open</i>                                                                                                                                                                                                                                                                                                                                                                                                                                                                                                                                                                                                                                                                                                                                                                                                                                                                                                                                                                                                                                                                                                                                                                                                                                                                                                                                                                                                                                                                                                                                                                                                                                                                                                                                        |
| Manuscript ID                   | bmjopen-2022-063900.R3                                                                                                                                                                                                                                                                                                                                                                                                                                                                                                                                                                                                                                                                                                                                                                                                                                                                                                                                                                                                                                                                                                                                                                                                                                                                                                                                                                                                                                                                                                                                                                                                                                                                                                                                 |
| Article Type:                   | Original research                                                                                                                                                                                                                                                                                                                                                                                                                                                                                                                                                                                                                                                                                                                                                                                                                                                                                                                                                                                                                                                                                                                                                                                                                                                                                                                                                                                                                                                                                                                                                                                                                                                                                                                                      |
| Date Submitted by the Author:   | 09-Sep-2022                                                                                                                                                                                                                                                                                                                                                                                                                                                                                                                                                                                                                                                                                                                                                                                                                                                                                                                                                                                                                                                                                                                                                                                                                                                                                                                                                                                                                                                                                                                                                                                                                                                                                                                                            |
| Complete List of Authors:       | <p>Aldhahir, Abdulelah; Jazan University, Faculty of Applied Medical Sciences, Respiratory Therapy Department<br/>         Alqahtani , Jaber S. ; Prince Sultan Military College of Health Sciences, Department of Respiratory Care<br/>         AlDraiwiesh, Ibrahim; Prince Sultan Military College of Health Sciences, Department of Respiratory Care<br/>         Alghamdi, Saeed; Umm Al-Qura University College of Applied Medical Science, Clinical Technology Department, Respiratory Care Program; Imperial College London, National Heart and Lung Institute<br/>         Alsulayyim, Abdullah; Imperial College London, National Heart and Lung Institute; Jazan University, Faculty of Applied Medical Sciences<br/>         Alqarni, Abdullah; King Abdulaziz University, Department of Respiratory Therapy, Faculty of Medical Rehabilitation Sciences<br/>         Alhotye, Munyra; King Saud bin Abdulaziz University for Health Sciences College of Applied Medical Sciences, Department of Respiratory Therapy<br/>         Alwafi, Hassan; Umm Al-Qura University College of Medicine, Faculty of Medicine<br/>         Siraj, Rayan; King Faisal University, Department of Respiratory Therapy, College of Applied Medical Sciences<br/>         Alrajeh, Ahmed; King Faisal University, Department of Respiratory Therapy, College of Applied Medical Sciences<br/>         Aldabayan, Yousef; King Faisal University, Department of Respiratory Therapy, College of Applied Medical Sciences<br/>         Alzahrani, Eidan ; Prince Sultan Military College of Health Sciences, Department of Physiotherapy<br/>         Hakamy, Ali ; Jazan University, Respiratory Therapy Department, Faculty of Applied Medical Sciences</p> |
| <b>Primary Subject Heading</b>: | Rehabilitation medicine                                                                                                                                                                                                                                                                                                                                                                                                                                                                                                                                                                                                                                                                                                                                                                                                                                                                                                                                                                                                                                                                                                                                                                                                                                                                                                                                                                                                                                                                                                                                                                                                                                                                                                                                |
| Secondary Subject Heading:      | Rehabilitation medicine                                                                                                                                                                                                                                                                                                                                                                                                                                                                                                                                                                                                                                                                                                                                                                                                                                                                                                                                                                                                                                                                                                                                                                                                                                                                                                                                                                                                                                                                                                                                                                                                                                                                                                                                |
| Keywords:                       | REHABILITATION MEDICINE, RESPIRATORY MEDICINE (see Thoracic Medicine), Chronic airways disease < THORACIC MEDICINE                                                                                                                                                                                                                                                                                                                                                                                                                                                                                                                                                                                                                                                                                                                                                                                                                                                                                                                                                                                                                                                                                                                                                                                                                                                                                                                                                                                                                                                                                                                                                                                                                                     |
|                                 |                                                                                                                                                                                                                                                                                                                                                                                                                                                                                                                                                                                                                                                                                                                                                                                                                                                                                                                                                                                                                                                                                                                                                                                                                                                                                                                                                                                                                                                                                                                                                                                                                                                                                                                                                        |

1  
2  
3  
4  
5  
6  
7  
8  
9  
10  
11  
12  
13  
14  
15  
16  
17  
18  
19  
20  
21  
22  
23  
24  
25  
26  
27  
28  
29  
30  
31  
32  
33  
34  
35  
36  
37  
38  
39  
40  
41  
42  
43  
44  
45  
46  
47  
48  
49  
50  
51  
52  
53  
54  
55  
56  
57  
58  
59  
60





I, the Submitting Author has the right to grant and does grant on behalf of all authors of the Work (as defined in the below author licence), an exclusive licence and/or a non-exclusive licence for contributions from authors who are: i) UK Crown employees; ii) where BMJ has agreed a CC-BY licence shall apply, and/or iii) in accordance with the terms applicable for US Federal Government officers or employees acting as part of their official duties; on a worldwide, perpetual, irrevocable, royalty-free basis to BMJ Publishing Group Ltd ("BMJ") its licensees and where the relevant Journal is co-owned by BMJ to the co-owners of the Journal, to publish the Work in this journal and any other BMJ products and to exploit all rights, as set out in our [licence](#).

The Submitting Author accepts and understands that any supply made under these terms is made by BMJ to the Submitting Author unless you are acting as an employee on behalf of your employer or a postgraduate student of an affiliated institution which is paying any applicable article publishing charge ("APC") for Open Access articles. Where the Submitting Author wishes to make the Work available on an Open Access basis (and intends to pay the relevant APC), the terms of reuse of such Open Access shall be governed by a Creative Commons licence – details of these licences and which [Creative Commons](#) licence will apply to this Work are set out in our licence referred to above.

Other than as permitted in any relevant BMJ Author's Self Archiving Policies, I confirm this Work has not been accepted for publication elsewhere, is not being considered for publication elsewhere and does not duplicate material already published. I confirm all authors consent to publication of this Work and authorise the granting of this licence.

1  
2  
3 1 **Healthcare Providers' Attitudes, Beliefs and Barriers to Pulmonary**  
4  
5  
6 2 **Rehabilitation for Chronic Obstructive Pulmonary Disease Patients in Saudi**  
7  
8  
9 3 **Arabia: A Cross-Sectional Study**  
10  
11 4

13 5 Abdulelah M. Aldhahir <sup>1</sup>

14 6 Jaber S. Alqahtani<sup>2</sup>

15 7 Ibrahim A. Aldraiwiesh<sup>2</sup>

16 8 Saeed M. Alghamdi<sup>3,4</sup>

17 9 Abdullah S. Alsulayyim<sup>1,4</sup>

18 10 Abdullah A. Alqarni <sup>5</sup>

19 11 Munyra Alhotye<sup>6</sup>

20 12 Hassan Alwafi<sup>7</sup>

21 13 Rayan A. Siraj<sup>8</sup>

22 14 Ahmed M. Alrajeh<sup>8</sup>

23 15 Yousef S. Aldabayan<sup>8</sup>

24 16 Eidan M. Alzahrani<sup>9</sup>

25 17 Ali Hakamy<sup>1</sup>

26 18  
27 19  
28 20 <sup>1</sup>Respiratory Therapy Department, Faculty of Applied Medical Sciences, Jazan University, Jazan, Saudi  
29 21 Arabia; <sup>2</sup>Department of Respiratory Care, Prince Sultan Military College of Health Sciences, Dammam,  
30 22 Saudi Arabia; <sup>3</sup>Clinical Technology Department, Respiratory Care Program, Faculty of Applied Medical  
31 23 Sciences, Umm Al-Qura University, Makkah, Saudi Arabia; <sup>4</sup>National Heart and Lung Institute, Imperial  
32 24 College London, UK; <sup>5</sup>Department of Respiratory Therapy, Faculty of Medical Rehabilitation Sciences,  
33 25 King Abdulaziz University, Jeddah, Saudi Arabia; <sup>6</sup>Department of Respiratory Therapy, King Saud Bin  
34 26 Abdulaziz University for Health Sciences, Riyadh, Saudi Arabia; <sup>7</sup>Faculty of Medicine, Umm Al-Qura  
35 27 University, Mecca, Saudi Arabia; <sup>8</sup>Department of Respiratory Therapy, College of Applied Medical  
36 28 Sciences, King Faisal University, Al-Hasa, Saudi Arabia; Department of Physiotherapy, Prince Sultan  
37 29 Military College of Health Sciences, Dammam, Saudi Arabia  
38 30

39 31  
40 32  
41 33  
42 34 **Word count: 2852**  
43 35  
44 36  
45 37

46 38 Corresponding Author:

47 39 Abdulelah Mastour Aldhahir, PhD

48 40 Respiratory Therapy Department

49 41 Faculty of Applied Medical Sciences

50 42 Jazan University

51 43 Saudi Arabia

52 44 Phone: +966557775561

53 45 Email: [Aldhahir.abdulelah@hotmail.com](mailto:Aldhahir.abdulelah@hotmail.com)  
54  
55  
56  
57  
58  
59  
60

## Abstract

**Objectives:** To assess the attitude of healthcare Providers (HCPs) towards the delivering of pulmonary rehabilitation (PR) to chronic obstructive pulmonary disease (COPD) patients and identify factors and barriers that might influence referral.

**Design:** A cross-sectional online survey consisting of nine multiple-choice questions.

**Settings:** Saudi Arabia.

**Participants:** 980 HCPs including nurses, respiratory therapists (RT), and physiotherapists.

**Primary outcome measures:** HCPs attitudes towards and expectations of the delivery of PR to COPD patients and the identification of factors and barriers that might influence referral in Saudi Arabia.

**Results:** Overall, 980 HCPs, 53.1% of whom were male, completed the survey. Nurses accounted for 40.1% of the total sample size, and RTs and physiotherapists accounted for 32.1% and 16.5%, respectively. The majority of HCPs strongly agreed that PR would improve exercise capacity 589 (60.1%), health-related quality of life 571 (58.3%), and disease self-management in COPD patients 589 (60.1%). Moreover, the in-hospital supervised PR programme was the preferred method of delivering PR, according to 374 (38.16%) HCPs. Around 85% of HCPs perceived information about COPD, followed by smoking cessation 787 (80.3%) as essential components of PR besides the exercise component. The most common patient-related factor that strongly influenced referral decisions was “mobility affected by breathlessness” (64%), while the “availability of PR centres” (61%), the “lack of trained HCPs” (52%) and the “lack of authority to refer patients” (44%) were the most common barriers to referral.

**Conclusion:** PR is perceived as an effective management strategy for COPD patients. A supervised hospital-based programme is the preferred method of delivering PR, with information about COPD and smoking cessation considered essential components of PR besides the exercise component. A lack of PR centres, well-trained staff, and the authority to refer patients were major barriers to referring COPD patients. Further research is needed to confirm HCP perceptions of patient-related barriers.

Keywords: PR, COPD, pulmonary rehabilitation, Saudi Arabia

1  
2  
3  
4 79 - **Strengths and limitations of this study**  
5

- 6 80 1. To our knowledge, this is the first national study that explores HCPs' attitudes and beliefs  
7 81 about the delivery of PR to COPD patients and identifies factors and barriers that might  
8 82 influence referral in Saudi Arabia  
9 83 2. The availability of PR centres, the lack of trained HCPs and the lack of authority to refer  
10 84 patients were the most common barriers preventing the referral of COPD patients to PR  
11 85 programme  
12 86 3. The study was conducted during the COVID-19 pandemic, which may have impacted the  
13 87 respondents' opinions.  
14  
15  
16  
17  
18  
19  
20  
21  
22  
23  
24  
25  
26  
27  
28  
29  
30  
31  
32  
33  
34  
35  
36  
37  
38  
39  
40  
41  
42  
43  
44  
45  
46  
47  
48  
49  
50  
51  
52  
53  
54  
55  
56  
57  
58  
59  
60

For peer review only

## 1. Introduction

COPD is a common, preventable, and treatable disease characterized by airway and/or alveolar abnormalities, leading to airflow limitation and persistent pulmonary symptoms [1]. Patients with COPD are susceptible to daily respiratory symptoms, reduced exercise capacity and frequent chest infections that could result in deterioration of lung function and acceleration of disease progression, subsequently leading to emergency hospital admissions [1, 2]. In addition to pharmacologic approaches, the International Global Initiative for Obstructive Lung Disease (GOLD) stresses the importance of including non-pharmacologic interventions such as PR in the management of COPD symptoms as PR provides symptomatic improvement [3, 4], thereby reducing unnecessary hospital admissions.

PR is a comprehensive, multidisciplinary, non-pharmacologic intervention aimed at improving quality of life and exercise performance in patients with COPD [4-6]. PR usually consists of patient assessment with an exercise test and dyspnoea assessment, exercise training that includes endurance and resistance training, quality of life measure, nutritional with occupational evaluation and health education and is administered by a group of multidisciplinary healthcare providers [7].

There has been an increasing trend in Saudi Arabia's prevalence and incidence of COPD from 1990 to 2019 [8]. In 2019, it has been estimated that around 434,560 people had COPD in the Kingdom of Saudi Arabia [8]. This study shows that the burden of COPD is increasing, and public health policy is necessary to offset this trend. PR programmes are an example of community-based primary care management that must be implemented to lessen such a burden [8]. However, in Saudi Arabia, PR programmes are often unavailable or underutilised [9], ] for multiple reasons, including the lack of trained staff who can manage patients with COPD [10]. In addition, PR services across the country must be conducted under close supervision by pulmonologists or internists with an interest in pulmonary medicine, although the number of

1  
2  
3 113 chest physicians in Saudi Arabia is relatively low [11, 12]. Consequently, an inadequate  
4  
5 114 number of services are provided to meet the needs of patients with COPD.  
6  
7  
8 115 International and national COPD management guidelines recommend increasing the  
9  
10 116 implementation of PR programmes worldwide by involving well-trained healthcare providers  
11  
12 117 in the PR team [5, 11, 12], considering that COPD is now perceived as a heterogeneous disease  
13  
14 118 with multisystem manifestation that causes systemic consequences [12]. Despite the current  
15  
16 119 contribution and involvement of experienced healthcare providers (e.g., nurses, respiratory  
17  
18 120 therapists, physiotherapists, psychologists, occupational therapists, and dietitians) in Saudi PR  
19  
20 121 programmes, awareness of and barriers to healthcare professionals in delivering PR  
21  
22 122 programmes in Saudi Arabia are limited. Recently, we have conducted a study to assess  
23  
24 123 pulmonologists', internists', and general practitioners' attitudes towards the delivery of PR to  
25  
26 124 COPD patients and to identify factors and barriers that might influence PR referral decisions.  
27  
28 125 Our findings showed that the referral rate was low among all physicians, which was attributed  
29  
30 126 to a lack of PR centres and trained staff [13]. Given the fact that our previous study did not  
31  
32 127 survey non-physicians health care providers' attitudes, although they were implicated as a  
33  
34 128 barrier to referral, the present study aimed to explore allied healthcare professionals' attitudes  
35  
36 129 and expectations towards delivering a PR programme and identify their views on factors and  
37  
38 130 barriers that might influence the referral of COPD patients in Saudi Arabia.  
39  
40  
41  
42  
43  
44  
45  
46

## 132 **2. Methods**

### 133 *2.1. Study design*

134 A cross-sectional survey was conducted through an online platform (Survey Monkey) between  
135 September 15, 2021, and January 19, 2022.

### 136 137 *2.2. Questionnaire tool*



1  
2  
3 138 The survey was composed of nine multiple-choice closed questions and free text fields for  
4  
5  
6 139 additional comments; it was structured, formulated, and validated by multidisciplinary experts  
7  
8 140 including nursing, respiratory therapy, physiotherapy, and nutrition in the field of PR based on  
9  
10 141 the currently available literature [5, 7, 14]. Before the initial distribution, content and face  
11  
12 142 validity were assessed after piloting the survey with ten healthcare professionals with a clinical  
13  
14 143 background in COPD management.

16  
17 144 Before participants started to answer the questionnaire, the aim of the study was provided,  
18  
19 145 together with information about the lead investigator. Additionally, no personal information  
20  
21 146 was recorded; voluntary participation was ensured by asking if participants were happy to  
22  
23 147 complete the survey or not. An additional statement was provided in the survey: "By answering  
24  
25 148 'yes' in completing the survey question, you voluntarily agree to participate in this study and  
26  
27 149 give your consent to use your anonymous data for research purposes." The time required to  
28  
29 150 complete the survey was approximately three to five minutes. The questionnaire consisted of  
30  
31 151 two pages of structured responses that involved multiple-choice answers in three sections.  
32  
33 152 Section 1 requested the respondents' demographic information, including gender, profession,  
34  
35 153 years of experience and responsibilities in the management of COPD. Section 2 consisted of  
36  
37 154 three questions asking about healthcare providers' perceptions of PR. The first question had  
38  
39 155 six statements regarding the effectiveness of PR with COPD patients and used a 5-point Likert  
40  
41 156 scale ranging from 1 = strongly disagree to 5 = strongly agree. The second question asked about  
42  
43 157 additional components of PR aside from the exercise component, and the third question was  
44  
45 158 about the best way to deliver PR for COPD patients. Section 3 included two questions regarding  
46  
47 159 patient-related factors that influence referral decisions and process-related factors that  
48  
49 160 influence the decision not to refer COPD patients. These questions used influence as a grading  
50  
51 161 tool: no influence, some influence and strong influence. (See Appendix 1)  
52  
53  
54  
55  
56  
57  
58  
59  
60

### 163 2.3. *Sampling strategy*

164 Professional committees managing respiratory diseases such as Saudi Society of Respiratory  
165 Care, Saudi Physical Therapy Association and Saudi Nurses Association, and social networks  
166 (Twitter, WhatsApp, and Telegram) were used to distribute the survey to reach a greater  
167 number of HCPs working in Saudi Arabia. Professional committees posted the survey on their  
168 social media pages and sent emails to their members. Additionally, four authors from four  
169 different medical institutions in four different regions of Saudi Arabia have participated in the  
170 data collection. Each data collector was responsible for distributing the survey in his/her region  
171 to HCPs to ensure that all the geographical areas of Saudi Arabia were covered.

### 173 2.4. *Patient and Public Involvement statement*

174 Patients were not involved.

### 176 2.5. *Sample size*

177 Convenience sampling techniques were used to recruit the study participants. Nurses,  
178 respiratory therapists, physiotherapists, psychologists, occupational therapists, and nutritionists  
179 involved in managing COPD patients or who had potential contact with this population were  
180 the main targets. Sample size calculation was not required, as this was an exploratory study  
181 designed.

### 183 2.6. *Ethical approval*

184 Institutional Review Board approval for the study was obtained from Jazan University,  
185 reference number (HAPO-10-Z-001).

186

## 187 2.7. Statistical analysis

188 Data were collected and analysed using the Statistical Package for Social Sciences (SPSS  
189 software, Version 25). The categorical variables were reported and presented in percentages  
190 and frequencies. A Chi-square ( $\chi^2$ ) test was used to assess the statistically significant difference  
191 between categorical variables. Statistical significance was considered if the  $p < 0.05$ .

## 193 3. Results

194 Overall, 980 HCPs (53.1% male) participated in the online survey between September 9, 2021,  
195 and January 19, 2022. Nurses accounted for 40.1% of the participants, followed by respiratory  
196 therapists (32.1%), physiotherapists (16.5%) and other healthcare specialties (11.2%) such as  
197 nutritionists and occupational therapists. The majority of respondents had one to two (30%) or  
198 three to four (26%) years of clinical experience in caring for COPD patients, while 15.2% had  
199 five to six years. Oxygen therapy (57%), inpatient treatment (47.1%), ongoing management  
200 (42.1%), diagnosis (38.9%), and outpatient clinics (38.1%) were the main responsibilities for  
201 managing COPD patients (Table 1).

202 **Table 1:** Demographic data and characteristics of all study respondents (n= 980).

| Demographic variables                 | Frequency (%) |
|---------------------------------------|---------------|
| Gender                                |               |
| Male                                  | 520 (53.1%)   |
| Female                                | 460 (46.9%)   |
| Profession                            |               |
| Nursing                               | 393 (40.1%)   |
| Respiratory therapy                   | 315 (32.1%)   |
| Physiotherapy                         | 162 (16.5%)   |
| Others                                | 110 (11.2%)   |
| Year of experience with COPD patients |               |
| < 1 year                              | 96 (9.8%)     |
| 1-2 years                             | 294 (30%)     |
| 3-4 years                             | 255 (26%)     |
| 5-6 years                             | 149 (15.2%)   |
| 7-8 years                             | 75 (7.7%)     |
| 9-10 years                            | 47 (6.5%)     |
| >10 years                             | 47 (4.8%)     |

| Responsibilities for care with COPD patients |             |
|----------------------------------------------|-------------|
| Diagnosis                                    | 381 (38.9%) |
| Urgent assessments                           | 350 (35.7%) |
| Non-urgent care                              | 360 (36.7%) |
| Ongoing management                           | 413 (42.1%) |
| Admission prevention                         | 227 (23.2%) |
| Medication check                             | 360 (36.7%) |
| Prescribing                                  | 106 (10.8%) |
| Oxygen therapy                               | 559 (57%)   |
| In patient treatment                         | 462 (47.1%) |
| Outpatient clinics                           | 373 (38.1%) |
| Primary care                                 | 282 (28.8%) |

204 Data are presented as frequencies and percentages.

205

### 206 3.1. *Healthcare providers' opinions on referring COPD patients*

207 Most HCPs strongly agreed that PR would improve COPD patients' exercise capacity (589, or  
 208 60.1%), and they strongly believed that PR would reduce symptoms of dyspnoea and fatigue  
 209 (545, or 55.6%). In addition, most HCPs strongly agreed that PR would reduce levels of anxiety  
 210 and depression (479, or 48.9%), and 571 (58.3%) strongly agreed that PR would improve  
 211 patients' health-related quality of life. Moreover, 517 (52.8%) strongly agreed that PR would  
 212 reduce hospital readmission, and 528 (53.9%) strongly agreed that PR would reduce the risk  
 213 of future COPD exacerbation. Moreover, 440 HCPs (44.9%) strongly agreed that PR would  
 214 improve patients' nutritional status, and the majority strongly agreed that PR would improve  
 215 disease self-management in COPD patients (589, or 60.1%) (Table 2).

216

### 217 3.2. *Mode of delivery and components of pulmonary rehabilitation*

218 When asked about the preferred way to deliver a PR programme for COPD patients, most HCPs  
 219 believed that in-hospital supervised PR was the preferred method (748, or 76.3%), followed by  
 220 delivering the PR at home (557, or 56.8%). However, only 275 (28.1%) believed that tailored  
 221 PR with healthcare provider support over the phone would be the preferred method. Most HCPs  
 222 believed that the essential components of PR include information about COPD disease (832,

223 or 84.9%), followed by smoking cessation (787, or 80.3%) and COPD symptoms management  
 224 (749, or 76.4%), aside from the exercise component (Table 3).

225  
 226 **Table 2:** Healthcare providers' perception on referring COPD patients to pulmonary  
 227 rehabilitation (n=980).

| Item                                                                      | Frequency (%) |
|---------------------------------------------------------------------------|---------------|
| <b>Perception on referring COPD patients to PR</b>                        |               |
| <i>I believe PR will improve patients' exercise capacity</i>              |               |
| Strongly agree                                                            | 589 (60.1%)   |
| Agree                                                                     | 260 (26.5%)   |
| Neutral                                                                   | 32 (3.3%)     |
| Disagree                                                                  | 8 (0.8%)      |
| Strongly disagree                                                         | 91 (9.3%)     |
| <i>I believe PR would reduce dyspnoea and fatigue</i>                     |               |
| Strongly agree                                                            | 545 (55.6%)   |
| Agree                                                                     | 297 (30.3%)   |
| Neutral                                                                   | 62 (6.3%)     |
| Disagree                                                                  | 25 (2.6%)     |
| Strongly disagree                                                         | 51 (5.2%)     |
| <i>I believe PR will improve patients' anxiety and depression</i>         |               |
| Strongly agree                                                            | 479 (48.9%)   |
| Agree                                                                     | 320 (32.7%)   |
| Neutral                                                                   | 105 (10.7%)   |
| Disagree                                                                  | 29 (3%)       |
| Strongly disagree                                                         | 47 (4.8%)     |
| <i>I believe PR will improve patients' health-related quality of life</i> |               |
| Strongly agree                                                            | 571 (58.3%)   |
| Agree                                                                     | 283 (28.9%)   |
| Neutral                                                                   | 57 (5.8%)     |
| Disagree                                                                  | 19 (1.9%)     |
| Strongly disagree                                                         | 50 (5.1%)     |
| <i>I believe PR will reduce the risk hospital readmission</i>             |               |
| Strongly agree                                                            | 517 (52.8%)   |
| Agree                                                                     | 317 (32.3%)   |
| Neutral                                                                   | 70 (7.1%)     |
| Disagree                                                                  | 28 (2.9%)     |
| Strongly disagree                                                         | 48 (4.9%)     |
| <i>I believe PR will reduce the risk of future COPD exacerbation</i>      |               |
| Strongly agree                                                            | 528 (53.9%)   |
| Agree                                                                     | 305 (31.1%)   |
| Neutral                                                                   | 78 (8%)       |
| Disagree                                                                  | 18 (1.8%)     |
| Strongly disagree                                                         | 51 (5.2%)     |
| <i>I believe PR will improve patients' nutritional status</i>             |               |
| Strongly agree                                                            | 440 (44.9%)   |
| Agree                                                                     | 341 (34.8%)   |
| Neutral                                                                   | 117 (11.9%)   |
| Disagree                                                                  | 28 (2.9%)     |
| Strongly disagree                                                         | 54 (5.5%)     |
| <i>I believe PR will improve patients' disease self-management</i>        |               |
| Strongly agree                                                            | 589 (60.1%)   |
| Agree                                                                     | 260 (26.5%)   |

|                   |           |
|-------------------|-----------|
| Neutral           | 32 (3.3%) |
| Disagree          | 8 (0.8%)  |
| Strongly disagree | 91 (9.3%) |

228 Data are presented as frequencies and percentages.

229

230 **Table 3:** Mode of delivery and component of pulmonary rehabilitation programme (n=980).

| Item                                                              | Frequency (%) |
|-------------------------------------------------------------------|---------------|
| <b>The best way to deliver PR programme for COPD patients</b>     |               |
| In hospital supervised programme                                  | 374 (38.16%)  |
| At home                                                           | 276 (28.16%)  |
| Online programme with healthcare provider support                 | 192 (19.59%)  |
| Tailored programme with healthcare provider support through phone | 138 (14.08%)  |
| <b>Component of PR programme aside from exercise component</b>    |               |
| Information about COPD disease                                    | 832 (84.9%)   |
| Smoking cessation                                                 | 787 (80.3%)   |
| Symptoms management                                               | 749 (76.4%)   |
| Psychological support                                             | 671 (68.5%)   |
| Information about medications                                     | 648 (66.1%)   |
| Nutritional counselling                                           | 526 (53.7%)   |

231 Data are presented as frequencies and percentages.

232

### 233 3.3. *Patient-related factors that influence referral decisions to pulmonary* 234 *rehabilitation*

235 The main factors that strongly influenced the decision to refer COPD patients to PR from the  
236 HCPs' perspective included mobility affected by patients' breathlessness (64.10%), followed  
237 by low activity levels (61.60%), low exercise tolerance (58.20%), patient fatigue related to  
238 COPD (52.90%), and patient anxiety related to COPD (50.70%) (Figure 1).

239

### 240 3.4. *Pulmonary rehabilitation referral barriers*

241 From the HCPs' perspective, the main barriers that strongly affect the referral process for  
242 COPD patients included a lack of available PR centres (61.80%), followed by a lack of trained  
243 HCPs who could manage COPD patients (52.70%) and the lack of authority to refer a patient  
244 (44.30%). In addition, 43% reported that patients might refuse the referral process (Figure 2).

245

## 246 4. Discussion

1  
2  
3 247 To the best of our knowledge, this is the first national study that explores assess non physician  
4  
5 248 HCPs attitudes and expectation toward delivering PR to COPD patients and identify factors  
6  
7  
8 249 and barriers that might influence referral in Saudi Arabia. Findings show that HCPs perceived  
9  
10 250 PR as an effective management strategy in improving clinical outcomes in COPD. While a  
11  
12 251 supervised hospital-based programme was seen as the preferred mode of delivery, the lack of  
13  
14 252 PR centres, well-trained staff, and the authority to refer posed significant barriers to PR  
15  
16 253 referrals. HCPs perceived patients' education about COPD disease, smoking cessation and  
17  
18 254 symptoms management as the most essential components of PR programme next to exercise  
19  
20 255 component.

23  
24 256 PR has established a solid position as the cornerstone of the management of patients with  
25  
26 257 COPD. Indeed, current evidence shows that PR alleviates exercise limitations and dyspnoea,  
27  
28 258 improves nutritional status and psychological well-being, and reduces hospitalizations, future  
29  
30 259 COPD exacerbations, and mortality rates [5, 15, 16]. In our study, HCPs perceived mobility  
31  
32 260 affected by breathlessness, low activity levels, and low exercise tolerance as the most common  
33  
34 261 factors that influence referral decision which are in accordance with current international  
35  
36 262 guidelines [17, 18]. According to National Institute for Health and Care Excellence (NICE)  
37  
38 263 and British Thoracic Society (BTS) PR should be offer to patients who are short of breath and  
39  
40 264 functionally limited due to breathlessness [17, 18]. All these reported factors that influence  
41  
42 265 referral have been showed to effectively improved in COPD patients who were enrolled in PR  
43  
44 266 [19].

47  
48  
49 267 Despite the current evidence of PR effectiveness, the global referral rate is currently suboptimal  
50  
51 268 [13, 20, 21]. Current international COPD guidelines recommend the involvement of  
52  
53 269 experienced HCPs in the referral management of COPD patients; however, referral to PR  
54  
55 270 cannot be performed without physicians' permission in Saudi Arabia [17, 19, 21-23]. In the  
56  
57 271 current study, nearly half of the participants believed that a lack of authority to refer posed a  
58  
59  
60



1  
2  
3 272 significant barrier to PR referral. Therefore, experienced HCPs who are part of the PR team or  
4  
5 273 COPD management should promote physicians' knowledge about PR and its potential to  
6  
7  
8 274 enhance the PR referral rate.

9  
10 275 Reasons for not referring patients with COPD to PR programmes are likely to be multifactorial;  
11  
12 276 lack of available PR centres is at top of the list, as shown in this study which is in accordance  
13  
14 277 with recent study included physicians and concluded that limited PR centres was the cause of  
15  
16  
17 278 low PR referral [13]. Saudi Arabia has a limited number of PR centres, and the number of  
18  
19 279 people who can access these centres is extremely low [9]. This contrasts, for instance, with the  
20  
21 280 situation in the UK, which has 228 PR services. The gap in the current practice is therefore  
22  
23 281 clear, and the establishment of new PR programmes needs to be facilitated across the country.

24  
25  
26 282 It is however important to mention that PR programs can be offered within the existing  
27  
28 283 infrastructure using the incumbent HCPs in the hospitals [24]. It has been previously  
29  
30 284 demonstrated that an outpatient PR programme offered at a small hospital is as effective as a  
31  
32  
33 285 programme offered in a large hospital [25]. Current evidence also suggests that PR can be  
34  
35 286 effectively offered using different modalities, including inpatient, community-based, home  
36  
37 287 settings or online [25, 26]. Thus, any of these modes of delivery can be adopted according to  
38  
39 288 the hospital's available resources.

40  
41  
42 289 Participants in this study also perceived the lack of well-trained staff as a major barrier to PR  
43  
44 290 referral, in concordance with the current literature [13, 19, 21]. Studies show that Saudi Arabia  
45  
46 291 suffers from a severe shortage of healthcare professionals and that only limited specialties  
47  
48 292 participate in the management of COPD [27, 28]. Evidence suggests that COPD management  
49  
50 293 is much better if performed by a multidisciplinary team [28, 29], highlighting the need for an  
51  
52  
53 294 integrated approach. It is however important to mention that the number of specialized  
54  
55 295 physicians and healthcare professionals (e.g., respiratory nurses and respiratory  
56  
57 296 physiotherapists) is, overall, low [27, 28], which could affect the quality of COPD care in the  
58  
59  
60



1  
2  
3 297 country. Therefore, the healthcare authority in Saudi Arabia should take action to reduce the  
4  
5 298 current shortage by providing training incentives to people willing to specialize in respiratory  
6  
7 299 medicine and encouraging the upskilling of current healthcare workers. In addition, offering  
8  
9  
10 300 high-quality education either inside or outside the country could be a useful approach to  
11  
12 301 stimulate this change.

13  
14 302 Almost half of the study participants perceived “patients might refuse the referral” as a major  
15  
16 303 barrier to refer COPD patients to PR which is in accordance with recent study included  
17  
18 304 physicians and concluded that 46% perceived patients refuse referral is a major barrier [13].  
19  
20 305 This may be due to the lack of patients’ knowledge about the PR and its benefit to their  
21  
22 306 condition as well as travel distance to PR [19, 30, 31]. Therefore, incorporating patients’  
23  
24 307 preferences of PR delivery mode and increasing awareness of PR and its benefit among COPD  
25  
26 308 population are needed.

27  
28  
29 309 Almost 80% of HCPs in this study considered supervised hospital-based programmes the  
30  
31 310 preferred mode of PR delivery, despite the limited number of PR centres in the country. This  
32  
33 311 is likely because of a lack of knowledge about PR services in Saudi Arabia, as only a small  
34  
35 312 proportion of HCPs know what PR is [10]. However, utilizing the available resources within  
36  
37 313 the infrastructure of the hospital remains possible for setting up and delivering a PR  
38  
39 314 programme. Alternatively, home settings, which are as effective as conventional PR  
40  
41 315 programmes in improving exercise capacity and respiratory symptoms [32], could be  
42  
43 316 considered a viable option.

44  
45  
46 317 In this study, most HCPs believed that information about COPD disease, smoking cessation  
47  
48 318 and symptoms management are the most important components of a PR programme. Indeed,  
49  
50 319 disease-related education contributes to patients’ recognition of their symptoms and worsening  
51  
52 320 disease [33]. However, the content of the PR educational programme, who delivers it, and how  
53  
54 321 it is delivered remain unclear. According to the ATS/ERS official consensus, smoking  
55  
56  
57  
58  
59  
60

1  
2  
3 322 cessation is a major component of a PR programme [7, 14]. It is the primary cause of COPD,  
4  
5  
6 323 with the prevalence of COPD smokers ranging from 38% to 77% [34]. In addition, smoking  
7  
8 324 contributes to 73% of COPD-related deaths worldwide[35]. Smoking is also associated with  
9  
10  
11 325 accelerated lung function declines, higher COPD exacerbations [36, 37], and increased dropout  
12  
13 326 rates from PR. Therefore, support for smoking cessation should be offered throughout the PR  
14  
15 327 programme.

16  
17 328 Further research is needed to address COPD patients' attitudes and expectations toward  
18  
19 329 delivering a PR programme and identify factors and barriers of referring. Additionally, future  
20  
21 330 research should also focus on suitable mode of delivering PR as well as essential components  
22  
23 331 from patients' perspective.  
24  
25  
26  
27 332  
28  
29 333

#### 30 31 334 *4.1. limitations*

32  
33 335 Convenience sample techniques were used in the study, which may impose a selection bias.  
34  
35 336 In this study, we did not survey or interview physicians who are part of COPD management.  
36  
37 337 Additionally, we have failed to report the geographic distribution of the respondents.  
38  
39 338 Moreover, the exact number of HCPs who involved in PR and with COPD patients is unclear;  
40  
41 339 therefore, the sample of our study may not represent the general population of HCPs. Finally,  
42  
43 340 the study was conducted during the COVID-19 pandemic, which may have impacted  
44  
45 341 respondents' opinions, especially given that 28% of the total number of respondents reported  
46  
47 342 that home PR is their preferred method of PR delivery.  
48  
49  
50  
51 343

## 52 53 54 344 **5. Conclusion**

55  
56 345 HCPs across specialties agreed on the effectiveness of PR for COPD patients. A supervised  
57  
58 346 hospital-based programme is the preferred mode of PR delivery, with information about  
59  
60

1  
2  
3 347 COPD disease and smoking cessation being considered essential components of PR in  
4  
5 348 addition to the exercise component. The lack of PR centres and well-trained staff and the lack  
6  
7 349 of authority to refer patients were major barriers to the referral of COPD patients.  
8  
9

10 350

### 11 351 **Contributors**

12  
13  
14  
15 352 The study was designed by A.A., M.A., and J.S.A. Data collection was performed by A.A.A,  
16  
17 353 I.A.A, H.W, and A.S.A, statistical methodology was performed by A.A, and formal analysis  
18  
19 354 was performed by A.H, Y.S.A and S.M.A. The draft of the manuscript was written by A.M.A,  
20  
21 355 A.A.A, I.A.A, R.A.S, E.M.A and M.A, and reviewed and revised by E.M.A, J.S.A., H.W and  
22  
23 356 S.M.A. All authors approved the paper for publication.  
24

25 357

26 358 **Funding:** This research received no specific grant from any funding agency in the public,  
27  
28 359 commercial or not-for-profit sectors

29  
30 360 **Competing interests:** No, there are no competing interests for any author.

31  
32 361 **Patient consent for publication:** Not required

33  
34 362 **Ethics approval:** Institutional Review Board approval for the study was obtained from Jazan  
35  
36 363 University, reference number (HAPO-10-Z-001).

37  
38  
39 364 **Provenance and peer review:** Not commissioned; externally peer reviewed.

40  
41 365 **Data availability statement:** Data are available upon reasonable request.  
42  
43  
44 366

## References

1. Halpin, D.M.G., et al., *Global Initiative for the Diagnosis, Management, and Prevention of Chronic Obstructive Lung Disease. The 2020 GOLD Science Committee Report on COVID-19 and Chronic Obstructive Pulmonary Disease*. Am J Respir Crit Care Med, 2021. **203**(1): p. 24-36.
2. Alqahtani, J.S., et al., *Risk factors for all-cause hospital readmission following exacerbation of COPD: a systematic review and meta-analysis*. Eur Respir Rev, 2020. **29**(156).
3. von Trott, P., S.L. Oei, and C. Ramsenthaler, *Acupuncture for Breathlessness in Advanced Diseases: A Systematic Review and Meta-analysis*. J Pain Symptom Manage, 2020. **59**(2): p. 327-338 e3.
4. Evans, R.A. and S.J. Singh, *Minimum important difference of the incremental shuttle walk test distance in patients with COPD*. Thorax, 2019. **74**(10): p. 994-995.
5. Spruit, M.A., et al., *An official American Thoracic Society/European Respiratory Society statement: key concepts and advances in pulmonary rehabilitation*. Am J Respir Crit Care Med, 2013. **188**(8): p. e13-64.
6. Sahin, H., et al., *Is a pulmonary rehabilitation program effective in COPD patients with chronic hypercapnic failure?* Expert Rev Respir Med, 2016. **10**(5): p. 593-8.
7. Holland, A.E., et al., *Defining Modern Pulmonary Rehabilitation. An Official American Thoracic Society Workshop Report*. Annals of the American Thoracic Society, 2021. **18**(5): p. e12-e29.
8. Alqahtani, J.S., *Prevalence, incidence, morbidity and mortality rates of COPD in Saudi Arabia: Trends in burden of COPD from 1990 to 2019*. PLOS ONE, 2022. **17**(5): p. e0268772.
9. Aldhahir, A.M., et al., *Pulmonary rehabilitation for COPD: A narrative review and call for further implementation in Saudi Arabia*. Ann Thorac Med, 2021. **16**(4): p. 299-305.
10. Alsubaiei, M.E., et al., *Barriers for setting up a pulmonary rehabilitation program in the Eastern Province of Saudi Arabia*. Ann Thorac Med, 2016. **11**(2): p. 121-7.
11. Khan, J.H., et al., *The Saudi Guidelines for the Diagnosis and Management of COPD*. Ann Thorac Med, 2014. **9**(2): p. 55-76.
12. Celli, B.R., et al., *An Official American Thoracic Society/European Respiratory Society Statement: Research questions in chronic obstructive pulmonary disease*. Am J Respir Crit Care Med, 2015. **191**(7): p. e4-e27.
13. Aldhahir, A.M., et al., *Physicians' Attitudes, Beliefs and Barriers to a Pulmonary Rehabilitation for COPD Patients in Saudi Arabia: A Cross-Sectional Study*. Healthcare, 2022. **10**(5).
14. Hill, K., I. Vogiatzis, and C. Burtin, *The importance of components of pulmonary rehabilitation, other than exercise training, in COPD*. European Respiratory Review, 2013. **22**(129): p. 405.
15. Vogelmeier, C.F., et al., *Global strategy for the diagnosis, management, and prevention of chronic obstructive lung disease 2017 report*. American Journal of Respiratory and Critical Care Medicine, 2017. **195**(5): p. 557-582.
16. Aldhahir, A.M., et al., *Nutritional supplementation during pulmonary rehabilitation in COPD: A systematic review*. Chron Respir Dis, 2020. **17**: p. 1479973120904953.

17. Bolton, C.E., et al., *British Thoracic Society guideline on pulmonary rehabilitation in adults: accredited by NICE*. Thorax, 2013. **68**(Suppl 2): p. ii1.
18. National Institute for Health and Care Excellence: *Guidelines, in Chronic obstructive pulmonary disease in over 16s: diagnosis and management*. 2019, National Institute for Health and Care Excellence (NICE)  
Copyright © NICE 2018.: London.
19. Rochester, C.L., et al., *An Official American Thoracic Society/European Respiratory Society Policy Statement: Enhancing Implementation, Use, and Delivery of Pulmonary Rehabilitation*. American Journal of Respiratory and Critical Care Medicine, 2015. **192**(11): p. 1373-1386.
20. Milner, S.C., et al., *Rate of, and barriers and enablers to, pulmonary rehabilitation referral in COPD: A systematic scoping review*. Respir Med, 2018. **137**: p. 103-114.
21. Johnston, K.N., et al., *Barriers to, and facilitators for, referral to pulmonary rehabilitation in COPD patients from the perspective of Australian general practitioners: a qualitative study*. Primary Care Respiratory Journal, 2013. **22**(3): p. 319-324.
22. Hogg, L., et al., *Effectiveness, Attendance, and Completion of an Integrated, System-Wide Pulmonary Rehabilitation Service for COPD: Prospective Observational Study*. COPD: Journal of Chronic Obstructive Pulmonary Disease, 2012. **9**(5): p. 546-554.
23. Khan, J.H., et al., *The Saudi Guidelines for the Diagnosis and Management of COPD*. Annals of thoracic medicine, 2014. **9**(2): p. 55-76.
24. Jenkins, S., K. Hill, and N.M. Cecins, *State of the art: how to set up a pulmonary rehabilitation program*. Respirology, 2010. **15**(8): p. 1157-73.
25. Ward, J.A., et al., *Feasibility and effectiveness of a pulmonary rehabilitation programme in a community hospital setting*. Br J Gen Pract, 2002. **52**(480): p. 539-42.
26. Maltais, F., et al., *Effects of home-based pulmonary rehabilitation in patients with chronic obstructive pulmonary disease: a randomized trial*. Ann Intern Med, 2008. **149**(12): p. 869-78.
27. Aboshaiqah, A., *Strategies to address the nursing shortage in Saudi Arabia*. International Nursing Review, 2016. **63**(3): p. 499-506.
28. Alsubaiei, M., et al., *Factors influencing management of chronic respiratory diseases in general and chronic obstructive pulmonary disease in particular in Saudi Arabia: An overview*. Annals of Thoracic Medicine, 2018. **13**(3): p. 144-149.
29. Kuzma, A.M., et al., *Multidisciplinary care of the patient with chronic obstructive pulmonary disease*. Proceedings of the American Thoracic Society, 2008. **5**(4): p. 567-571.
30. Cox, N.S., et al., *Pulmonary rehabilitation referral and participation are commonly influenced by environment, knowledge, and beliefs about consequences: a systematic review using the Theoretical Domains Framework*. Journal of Physiotherapy, 2017. **63**(2): p. 84-93.
31. Lahham, A. and A.E. Holland, *The Need for Expanding Pulmonary Rehabilitation Services*. Life (Basel, Switzerland), 2021. **11**(11): p. 1236.
32. McCarthy, B., et al., *Pulmonary rehabilitation for chronic obstructive pulmonary disease*. Cochrane Database Syst Rev, 2015(2): p. Cd003793.

- 1  
2  
3  
4  
5  
6  
7  
8  
9  
10  
11  
12  
13  
14  
15  
16  
17  
18  
19
33. Crisafulli, E., et al., *Learning impact of education during pulmonary rehabilitation program. An observational short-term cohort study.* Monaldi Arch Chest Dis, 2010. **73**(2): p. 64-71.
  34. Tønnesen, P., *Smoking cessation and COPD.* European Respiratory Review, 2013. **22**(127): p. 37.
  35. MacNee, W., *Chronic obstructive pulmonary disease.* 5 ed. 2010: Oxford University Press. 3311-3344.
  36. Badaran, E., et al., *Smoking and COPD exacerbations.* European Respiratory Journal, 2012. **40**(Suppl 56): p. P1055.
  37. Brown, A.T., et al., *Determinants of successful completion of pulmonary rehabilitation in COPD.* International journal of chronic obstructive pulmonary disease, 2016. **11**: p. 391-397.

20  
21  
22

### Figure legend:

23  
24  
25

**Figure 1:** Patient-related factors that influence referral decision to PR, using strong, some or no influence grading (n=980).

26  
27  
28  
29

**Figure 2:** Barriers to referring COPD patients to PR from HCPs perspective, using strong, some or no influence grading (n=980).

1  
2  
3  
4  
5  
6  
7  
8  
9  
10  
11  
12  
13  
14  
15  
16  
17  
18  
19  
20  
21  
22  
23  
24  
25  
26  
27  
28  
29  
30  
31  
32  
33  
34  
35  
36  
37  
38  
39  
40  
41  
42  
43  
44  
45  
46  
47  
48  
49  
50  
51  
52  
53  
54  
55  
56  
57  
58  
59  
60

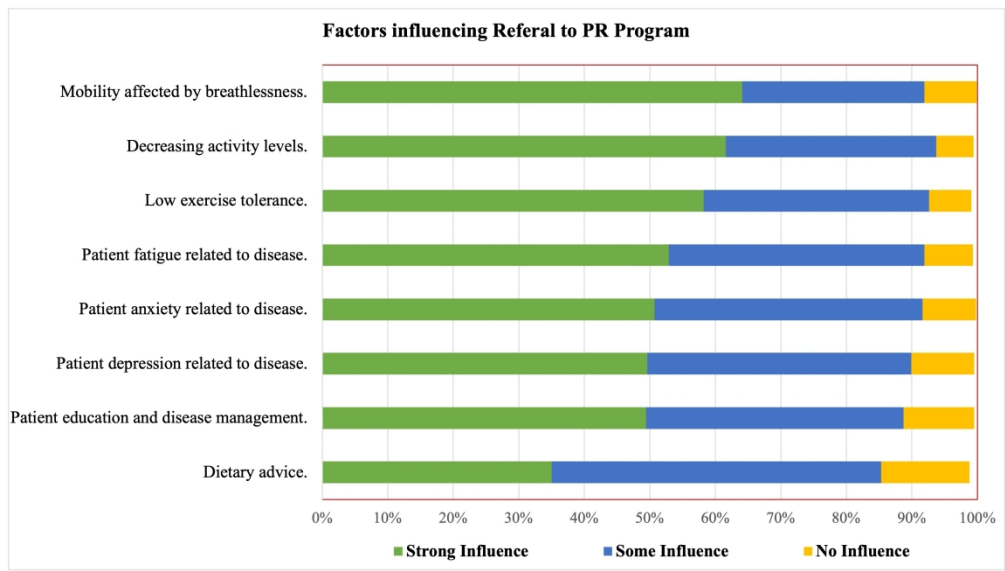

Patient-related factors that influence referral decision to PR, using strong, some or no influence grading.

247x139mm (330 x 330 DPI)



Barriers to referring COPD patients to PR from HCPs perspective, using strong, some or no influence grading.

247x138mm (330 x 330 DPI)



## Staff Attitudes and Expectations regarding a pulmonary rehabilitation for Chronic obstructive pulmonary disease patients.

We are aiming to understand your attitude and expectations toward delivering a Pulmonary rehabilitation programme for patients with Chronic obstructive pulmonary disease (COPD), and it would be great if you could answer this questionnaire.

Please fill out the survey, be informed that your identity will be completely anonymous and no personal identifying information will be collected and there are no consequences for refusing to participate, your participation is voluntary. This survey will only take 5 minutes to complete.

By answering the first question, you voluntarily agree to participate in this study and give your consent to use your anonymous data for research purposes.

### I. Demographic Information

1. Your Gender?

- A. Male
- B. Female

2. Your Profession?

- A. Nurse
- B. Respiratory therapist
- C. Physiotherapist
- D. Other:

3. What responsibilities do you have for the care of people with COPD? Tick all that apply.

- |                                             |                                               |                                                     |
|---------------------------------------------|-----------------------------------------------|-----------------------------------------------------|
| <input type="checkbox"/> Diagnosis          | <input type="checkbox"/> Prescribing          | <input type="checkbox"/> Inpatient treatment        |
| <input type="checkbox"/> Non-urgent care    | <input type="checkbox"/> Ongoing management   | <input type="checkbox"/> Outpatient clinics         |
| <input type="checkbox"/> Urgent assessments | <input type="checkbox"/> Admission prevention | <input type="checkbox"/> Primary care               |
| <input type="checkbox"/> Oxygen therapy     | <input type="checkbox"/> Medication checks    | <input type="checkbox"/> Other: please give details |

4. How many years of experience do you have of caring for people with COPD?

Please enter a whole number.

## II. Perceptions of a rehabilitation programme

5. For each statement please select the answer that best suits your opinion.

|                                                                                                      | Strongly disagree        | Disagree                 | Neutral                  | Agree                    | Strongly agree           |
|------------------------------------------------------------------------------------------------------|--------------------------|--------------------------|--------------------------|--------------------------|--------------------------|
| I believe that pulmonary rehabilitation programme will improve patients exercise capacity.           | <input type="checkbox"/> |
| I believe that pulmonary rehabilitation programme would be beneficial in reducing dyspnea & fatigue. | <input type="checkbox"/> |
| I believe that pulmonary rehabilitation programme will improve patient anxiety and depression        | <input type="checkbox"/> |
| I believe that pulmonary rehabilitation programme will improve health-related quality of life.       | <input type="checkbox"/> |
| I believe that pulmonary rehabilitation programme would help in reducing hospital readmission        | <input type="checkbox"/> |
| I think that pulmonary rehabilitation will reduces the risk of COPD exacerbation                     | <input type="checkbox"/> |
| I believe that pulmonary rehabilitation programme will improve patient nutritional status            | <input type="checkbox"/> |
| I believe that pulmonary rehabilitation programme will improve patient disease self-management       | <input type="checkbox"/> |

6. What do you think that pulmonary rehabilitation programme for individuals with COPD should contain aside from an exercise programme? Tick all that apply.

- |                                                         |                                                      |
|---------------------------------------------------------|------------------------------------------------------|
| <input type="checkbox"/> Information about COPD disease | <input type="checkbox"/> Symptoms management         |
| <input type="checkbox"/> Nutritional counseling         | <input type="checkbox"/> Smoking cessation           |
| <input type="checkbox"/> Psychological support          | <input type="checkbox"/> Others: please give details |
| <input type="checkbox"/> Information about medications  |                                                      |

If other, please give details

7. **What do you think is the best way to deliver a pulmonary rehabilitation programme for this population.**

- At the hospital. Where they can follow a programme supervised by healthcare professionals.
- By using an online programme with support from a healthcare professional to answer their questions.
- At home. Where they can follow a programme manual with the support of healthcare professionals.
- By following a tailored programme with the support of health care professionals through the phone.

**III. Referral to rehabilitation programme**

8. **In your opinion, what factors might influence decision to refer COPD patients to a pulmonary rehabilitation programme?**

|                                          | No influence             | Some influence           | Strong influence         |
|------------------------------------------|--------------------------|--------------------------|--------------------------|
| Mobility, affected by breathlessness     | <input type="checkbox"/> | <input type="checkbox"/> | <input type="checkbox"/> |
| Decreased activity levels                | <input type="checkbox"/> | <input type="checkbox"/> | <input type="checkbox"/> |
| Low exercise tolerance                   | <input type="checkbox"/> | <input type="checkbox"/> | <input type="checkbox"/> |
| Patient anxiety related to disease       | <input type="checkbox"/> | <input type="checkbox"/> | <input type="checkbox"/> |
| Depression related to disease            | <input type="checkbox"/> | <input type="checkbox"/> | <input type="checkbox"/> |
| Patient education and disease management | <input type="checkbox"/> | <input type="checkbox"/> | <input type="checkbox"/> |
| Fatigue related to disease               | <input type="checkbox"/> | <input type="checkbox"/> | <input type="checkbox"/> |
| Dietary advice                           | <input type="checkbox"/> | <input type="checkbox"/> | <input type="checkbox"/> |
| Others please give details               |                          |                          |                          |

9. **In your opinion, what factors might influence decision Not to refer COPD patients to a pulmonary rehabilitation programme ?**

|                                                                                    | No influence             | Some influence           | Strong influence         |
|------------------------------------------------------------------------------------|--------------------------|--------------------------|--------------------------|
| I don't have enough information about pulmonary rehabilitation programme           | <input type="checkbox"/> | <input type="checkbox"/> | <input type="checkbox"/> |
| I'm uncertain that the programme is worthwhile                                     | <input type="checkbox"/> | <input type="checkbox"/> | <input type="checkbox"/> |
| Patient refuses referral                                                           | <input type="checkbox"/> | <input type="checkbox"/> | <input type="checkbox"/> |
| Patient co-morbidities                                                             | <input type="checkbox"/> | <input type="checkbox"/> | <input type="checkbox"/> |
| Patient has doubts that rehabilitation is worthwhile                               | <input type="checkbox"/> | <input type="checkbox"/> | <input type="checkbox"/> |
| Transportation problems                                                            | <input type="checkbox"/> | <input type="checkbox"/> | <input type="checkbox"/> |
| Timing of classes not convenient for patient                                       | <input type="checkbox"/> | <input type="checkbox"/> | <input type="checkbox"/> |
| Lack of authority to refer patients                                                | <input type="checkbox"/> | <input type="checkbox"/> | <input type="checkbox"/> |
| Lack of trained staff who can manage COPD patients during pulmonary rehabilitation | <input type="checkbox"/> | <input type="checkbox"/> | <input type="checkbox"/> |
| Treatment cost                                                                     | <input type="checkbox"/> | <input type="checkbox"/> | <input type="checkbox"/> |
| Availability of pulmonary rehabilitation centers                                   | <input type="checkbox"/> | <input type="checkbox"/> | <input type="checkbox"/> |
| Others please give details                                                         |                          |                          |                          |

1  
2  
3  
4  
5  
6  
7  
8  
9  
10  
11  
12  
13  
14  
15  
16  
17  
18  
19  
20  
21  
22  
23  
24  
25  
26  
27  
28  
29  
30  
31  
32  
33  
34  
35  
36  
37  
38  
39  
40  
41  
42  
43  
44  
45  
46  
47  
48  
49  
50  
51  
52  
53  
54  
55  
56  
57  
58  
59  
60STROBE Statement—Checklist of items that should be included in reports of *cross-sectional studies*

|                              | <b>Item No</b> | <b>Recommendation</b>                                                                                                                                                                             | <b>Page number<br/>Line number</b> |
|------------------------------|----------------|---------------------------------------------------------------------------------------------------------------------------------------------------------------------------------------------------|------------------------------------|
| <b>Title and abstract</b>    | 1              | (a) Indicate the study's design with a commonly used term in the title or the abstract                                                                                                            | P: 1, Line: 3                      |
|                              |                | (b) Provide in the abstract an informative and balanced summary of what was done and what was found                                                                                               | P: 2,<br>Lines:46-73               |
| <b>Introduction</b>          |                |                                                                                                                                                                                                   |                                    |
| Background/rationale         | 2              | Explain the scientific background and rationale for the investigation being reported                                                                                                              | Pages 4 and 5                      |
| Objectives                   | 3              | State specific objectives, including any prespecified hypotheses                                                                                                                                  | Page 5,<br>lines:127-129           |
| <b>Methods</b>               |                |                                                                                                                                                                                                   |                                    |
| Study design                 | 4              | Present key elements of study design early in the paper                                                                                                                                           | Page 5<br>Lines:133-134            |
| Setting                      | 5              | Describe the setting, locations, and relevant dates, including periods of recruitment, exposure, follow-up, and data collection                                                                   | Page 7<br>Lines:163-169            |
| Participants                 | 6              | (a) Give the eligibility criteria, and the sources and methods of selection of participants                                                                                                       | Page 7<br>Lines:163-169            |
| Variables                    | 7              | Clearly define all outcomes, exposures, predictors, potential confounders, and effect modifiers. Give diagnostic criteria, if applicable                                                          | N/A                                |
| Data sources/<br>measurement | 8*             | For each variable of interest, give sources of data and details of methods of assessment (measurement). Describe comparability of assessment methods if there is more than one group              | Page 6<br>Lines:137-160            |
| Bias                         | 9              | Describe any efforts to address potential sources of bias                                                                                                                                         | N/A                                |
| Study size                   | 10             | Explain how the study size was arrived at                                                                                                                                                         | Page 7,<br>Line:175                |
| Quantitative<br>variables    | 11             | Explain how quantitative variables were handled in the analyses. If applicable, describe which groupings were chosen and why                                                                      | N/A                                |
| Statistical methods          | 12             | (a) Describe all statistical methods, including those used to control for confounding                                                                                                             | Page 7<br>Lines:182-185            |
|                              |                | (b) Describe any methods used to examine subgroups and interactions                                                                                                                               | N/A                                |
|                              |                | (c) Explain how missing data were addressed                                                                                                                                                       | N/A                                |
|                              |                | (d) If applicable, describe analytical methods taking account of sampling strategy                                                                                                                | N/A                                |
|                              |                | (e) Describe any sensitivity analyses                                                                                                                                                             | N/A                                |
| <b>Results</b>               |                |                                                                                                                                                                                                   |                                    |
| Participants                 | 13*            | (a) Report numbers of individuals at each stage of study—eg numbers potentially eligible, examined for eligibility, confirmed eligible, included in the study, completing follow-up, and analysed | Page 8<br>Lines:187-188            |
|                              |                | (b) Give reasons for non-participation at each stage                                                                                                                                              | N/A                                |
|                              |                | (c) Consider use of a flow diagram                                                                                                                                                                | N/A                                |
| Descriptive data             | 14*            | (a) Give characteristics of study participants (eg demographic, clinical, social) and information on exposures and potential confounders                                                          | Page 8:<br>Table 1                 |
|                              |                | (b) Indicate number of participants with missing data for each variable of interest                                                                                                               | N/A                                |

|                          |     |                                                                                                                                                                                                              |                              |
|--------------------------|-----|--------------------------------------------------------------------------------------------------------------------------------------------------------------------------------------------------------------|------------------------------|
| Outcome data             | 15* | Report numbers of outcome events or summary measures                                                                                                                                                         | Pages 9-11                   |
| Main results             | 16  | (a) Give unadjusted estimates and, if applicable, confounder-adjusted estimates and their precision (eg, 95% confidence interval). Make clear which confounders were adjusted for and why they were included | N/A                          |
|                          |     | (b) Report category boundaries when continuous variables were categorized                                                                                                                                    | N/A                          |
|                          |     | (c) If relevant, consider translating estimates of relative risk into absolute risk for a meaningful time period                                                                                             | N/A                          |
| Other analyses           | 17  | Report other analyses done—eg analyses of subgroups and interactions, and sensitivity analyses                                                                                                               | N/A                          |
| <b>Discussion</b>        |     |                                                                                                                                                                                                              |                              |
| Key results              | 18  | Summarise key results with reference to study objectives                                                                                                                                                     | Pages 11-12<br>Lines:238-245 |
| Limitations              | 19  | Discuss limitations of the study, taking into account sources of potential bias or imprecision. Discuss both direction and magnitude of any potential bias                                                   | Page:15<br>Lines:318-322     |
| Interpretation           | 20  | Give a cautious overall interpretation of results considering objectives, limitations, multiplicity of analyses, results from similar studies, and other relevant evidence                                   | Pages 11-14<br>Lines:238-315 |
| Generalisability         | 21  | Discuss the generalisability (external validity) of the study results                                                                                                                                        | N/A                          |
| <b>Other information</b> |     |                                                                                                                                                                                                              |                              |
| Funding                  | 22  | Give the source of funding and the role of the funders for the present study and, if applicable, for the original study on which the present article is based                                                | Page 15<br>Line:338          |

\*Give information separately for exposed and unexposed groups.

**Note:** An Explanation and Elaboration article discusses each checklist item and gives methodological background and published examples of transparent reporting. The STROBE checklist is best used in conjunction with this article (freely available on the Web sites of PLoS Medicine at <http://www.plosmedicine.org/>, Annals of Internal Medicine at <http://www.annals.org/>, and Epidemiology at <http://www.epidem.com/>). Information on the STROBE Initiative is available at [www.strobe-statement.org](http://www.strobe-statement.org).
